# Supplementary material for: Self-management interventions for people with pulmonary fibrosis: a scoping review
Source: PubMed Central journal article supplement — Eur Respir Rev. 2023 Nov 1;32(170):230092. doi: 10.1183/16000617.0092-2023 (PMC10618910; doi:10.1183/16000617.0092-2023), 2023-11-01
Supplement: ERR-0092-2023.SUPPLEMENT.pdf [file ERR-0092-2023.SUPPLEMENT.pdf]

## Supplement 1. Search strategy (Ovid Medline)

|    |                                                                                                                                                         |
|----|---------------------------------------------------------------------------------------------------------------------------------------------------------|
| 1  | exp lung diseases, interstitial/ or exp pulmonary fibrosis/                                                                                             |
| 2  | ((pulmon* or lung or alveol* or bronchopulmon* or bronchi*2 or airway*) adj2 fibro*4).mp.                                                               |
| 3  | (fibro* adj2 lung disease).mp.                                                                                                                          |
| 4  | (interstitial adj (pulmon* or lung or alveol* or bronchopulmon* or bronchi*2 or airway*)).mp.                                                           |
| 5  | 1 or 2 or 3 or 4                                                                                                                                        |
| 6  | exp self care/ or exp self-management/                                                                                                                  |
| 7  | exp disease management/                                                                                                                                 |
| 8  | (disease management or disease cent* management or symptom management or symptom cent* management).mp.                                                  |
| 9  | (self adj (manag* or care or maint* or help or regulat* or control or monitor* or health or confidence or efficacy or concept)).mp.                     |
| 10 | (self adj (educat* or learn* or aware* or knowledge* or involv* or engage* or empower*)).mp.                                                            |
| 11 | (patient* adj1 (participat* or activat* or empower* or engag* or involv* or collaborat* or cooperat* or co-operat* or autonomy or decision making)).mp. |
| 12 | (patient* adj3 (manag* or care or caring or maint* or help* or control* or monitor*) adj3 themsel*).mp.                                                 |
| 13 | "look after themsel*".mp.                                                                                                                               |
| 14 | exp health education/ or exp consumer health information/ or exp health literacy/ or exp health promotion/ or exp patient education as topic/           |
| 15 | ((health or medical or patient or disease) adj (education or knowledge or information)).mp.                                                             |
| 16 | exp "treatment adherence and compliance"/ or exp patient compliance/ or exp medication adherence/                                                       |
| 17 | (patient* adj (adhere* or comply or complian* or acceptance*)).mp.                                                                                      |
| 18 | ((treatment* or therap* or program* or protocol* or regimen*) adj (adhere* or comply or complian* or acceptance*)).mp.                                  |
| 19 | (manage* adj2 (medic* or treatment* or therap* or side effect* or comorbidit* or co morbidit* or symptom*)).mp.                                         |
| 20 | ((identif* or recogni* or manag* or prevent*) adj3 (exacerbation* or "flare up*" or flareup* or infection*)).mp.                                        |
| 21 | action plan*.mp.                                                                                                                                        |

|    |                                                                                                                                                                                                                  |
|----|------------------------------------------------------------------------------------------------------------------------------------------------------------------------------------------------------------------|
| 22 | exp Vaccination/ or Vaccination*.mp.                                                                                                                                                                             |
| 23 | quality of life.mp. or exp "Quality of Life"/                                                                                                                                                                    |
| 24 | ((lifestyle* or life style*) adj2 (chang* or adjust* or modif* or intervention*)).mp.                                                                                                                            |
| 25 | exp Exercise/ or exp Exercise Movement Techniques/ or exp Exercise Therapy/                                                                                                                                      |
| 26 | (pulmonary rehabilitation or respiratory rehabilitation or telerehabilitation or tele-rehabilitation or physical activit* or strength train* or endurance train* or stretch* exercise* or resistance train*).mp. |
| 27 | exp nutrition therapy/ or exp diet therapy/                                                                                                                                                                      |
| 28 | ((nutrition* or diet*) adj1 (chang* or adjust* or modif* or therap* or intervention* or education or knowledge)).mp.                                                                                             |
| 29 | exp Smoking/ or exp Smoking Cessation/                                                                                                                                                                           |
| 30 | ((stop* or quit* or reduc*) adj smoking).mp.                                                                                                                                                                     |
| 31 | exp adaptation, psychological/ or exp health knowledge, attitudes, practice/                                                                                                                                     |
| 32 | ((psycholog* or mental*) adj1 (adapt* or adjust)).mp.                                                                                                                                                            |
| 33 | Attitude to Health/                                                                                                                                                                                              |
| 34 | (health attitude* or attitude* to health).mp.                                                                                                                                                                    |
| 35 | (health* behavio?r* or adapt* behavio?r* or coping behavio?r* or social behavio?r*).mp.                                                                                                                          |
| 36 | (behavio?r* adj (change* or adjust* or modif* or therap* or intervention)).mp.                                                                                                                                   |
| 37 | (self cope or self coping).mp.                                                                                                                                                                                   |
| 38 | exp Self-Help Groups/                                                                                                                                                                                            |
| 39 | (support group* or peer group* or group therapy).mp.                                                                                                                                                             |
| 40 | exp mental health services/ or exp counseling/ or exp psychotherapy/                                                                                                                                             |
| 41 | ((mental health or mental or psycholog* or psychosocial or psycho-social or emotional) adj (support or program* or intervention* or well being or wellbeing or care)).mp.                                        |
| 42 | (mental adj (well being or wellbeing)).mp.                                                                                                                                                                       |
| 43 | exp advance care planning/ or exp advance directives/ or exp palliative care/ or exp terminal care/                                                                                                              |
| 44 | (palliative adj (care or approach or treatment or therapy)).mp.                                                                                                                                                  |
| 45 | (advance care plan* or advanced directive*).mp.                                                                                                                                                                  |
| 46 | or/6-45                                                                                                                                                                                                          |
| 47 | 5 and 46                                                                                                                                                                                                         |

|    |                                                                                                                                                                                                                                                    |
|----|----------------------------------------------------------------------------------------------------------------------------------------------------------------------------------------------------------------------------------------------------|
| 48 | limit 47 to ("all infant (birth to 23 months)" or "all child (0 to 18 years)" or "newborn infant (birth to 1 month)" or "infant (1 to 23 months)" or "preschool child (2 to 5 years)" or "child (6 to 12 years)" or "adolescent (13 to 18 years)") |
| 49 | 47 not 48                                                                                                                                                                                                                                          |
| 50 | limit 49 to (case reports or comment or editorial or letter)                                                                                                                                                                                       |
| 51 | 49 not 50                                                                                                                                                                                                                                          |
| 52 | limit 51 to humans                                                                                                                                                                                                                                 |
| 53 | limit 52 to english language                                                                                                                                                                                                                       |
