# Supplementary material for: Self-management interventions for people with pulmonary fibrosis: a scoping review
Source: PubMed Central journal article supplement — Eur Respir Rev. 2023 Nov 1;32(170):230092. doi: 10.1183/16000617.0092-2023 (PMC10618910; doi:10.1183/16000617.0092-2023), 2023-11-01
Supplement: ERR-0092-2023.SUPPLEMENT2.pdf [file ERR-0092-2023.SUPPLEMENT2.pdf]

**Supplement 2.1. Comprehensive information of included studies that reported quantitative results**

| Study (year)<br>Country                     | Study aim<br>Study period                                                                                                                                                | Design<br>Comparison<br>(where relevant)                                                                        | Target population<br>Sample size<br>Age (years)                                                                                | Intervention description                                                                                                                                                                                                                                                                                                                                                                 | Setting<br>Delivery format                                                                                                          | Study outcomes and results                                                                                                                                                                                                                                                                                                                                                                                                                                                                                                         |
|---------------------------------------------|--------------------------------------------------------------------------------------------------------------------------------------------------------------------------|-----------------------------------------------------------------------------------------------------------------|--------------------------------------------------------------------------------------------------------------------------------|------------------------------------------------------------------------------------------------------------------------------------------------------------------------------------------------------------------------------------------------------------------------------------------------------------------------------------------------------------------------------------------|-------------------------------------------------------------------------------------------------------------------------------------|------------------------------------------------------------------------------------------------------------------------------------------------------------------------------------------------------------------------------------------------------------------------------------------------------------------------------------------------------------------------------------------------------------------------------------------------------------------------------------------------------------------------------------|
| Al Moamary (2012) (1)<br>Saudi Arabia       | Examine the effects of a PR program on healthcare utilisation.<br><br>1 Jul 2004 – 15 Jan 2008                                                                           | Pre-post study (retrospective audit)                                                                            | ILD, bronchiectasis, severe asthma, scoliosis<br><br>32<br>ILD=21<br><br>Mean age (SD):<br>ILD=61.0 (9.4)                      | PR program <ul style="list-style-type: none"> <li>Duration: 8-12 weeks</li> <li>Frequency: 2-3 times/week</li> <li>Number of sessions: 18-24</li> </ul> Components: <ul style="list-style-type: none"> <li>Supervised exercise training</li> <li>Patient education</li> <li>Psychosocial support</li> </ul>                                                                              | Outpatient <ul style="list-style-type: none"> <li>In person</li> </ul> <i>Unclear whether it was in group or individual setting</i> | Healthcare utilisation: <ul style="list-style-type: none"> <li>ED visits – change not significant.</li> <li>Pulmonary outpatient department visits – number reduced 12 months after PR compared to 12 months pre-PR.</li> </ul>                                                                                                                                                                                                                 |
|                                             |                                                                                                                                                                          |                                                                                                                 |                                                                                                                                |                                                                                                                                                                                                                                                                                                                                                                                          |                                                                                                                                     | Exercise/functional capacity: <ul style="list-style-type: none"> <li>6MWD – improved following PR.</li> <li>Distances logged on treadmill, arm ergometer and bicycle – improved following PR.</li> </ul>                                                                                                                                                                                                                                        |
|                                             |                                                                                                                                                                          |                                                                                                                 |                                                                                                                                |                                                                                                                                                                                                                                                                                                                                                                                          |                                                                                                                                     | Treatments: <ul style="list-style-type: none"> <li>Short-acting bronchodilator inhalers – change not significant.</li> <li>Cumulative prednisone dose – change not significant.</li> <li>Antibiotics courses – change not significant.</li> </ul>                                                                                                                                                                                               |
| Archibald <i>et al</i> (2021) (2)<br>Canada | Examine the effects of participant characteristics, components and timing of palliative care, and carer engagement on location of death.<br><br>1 Jan 2012 – 25 Apr 2019 | Cohort study (retrospective audit)<br><br>Participants died at home/hospice vs<br>Participants died at hospital | Various ILD<br><br>92<br>Died at home/hospice=57<br>Died at hospital=35<br><br>Mean age (SD):<br>Died at home/hospice=73 (8.9) | Palliative care bundle including clinic/home visits and teleconferences <ul style="list-style-type: none"> <li>Days between first visit and death: participants died at home/hospice= median 318 (ranged 121-728); participants died at hospital= median 492 (ranged 237-1001)</li> <li>Number of visits: mean 4.5 (4.2) visits at home/hospice; 4.3 (3.5) visits at hospital</li> </ul> | Inpatient / outpatient / home <ul style="list-style-type: none"> <li>In person/remote</li> <li>Individual</li> </ul>                | Treatments: <ul style="list-style-type: none"> <li>Use of OT and opioids at death – significantly more of those who died at home/hospice used opioids for dyspnoea before death (88% vs 60%); but no difference between groups for OT (95% vs 91%).</li> <li>Time of OT initiation – those who died at home/hospice initiated OT 5 months earlier than those died at hospital, however, difference between groups not significant.</li> </ul>  |

|                                          |                                                                                                                                       |                                                 |                                                                       |                                                                                                                                                                                                                                                                                       |                                                                                           |                                                                                                                                                                                                                                                                                                                                                                                                         |                                                                                                                                                                                                                                                                         |
|------------------------------------------|---------------------------------------------------------------------------------------------------------------------------------------|-------------------------------------------------|-----------------------------------------------------------------------|---------------------------------------------------------------------------------------------------------------------------------------------------------------------------------------------------------------------------------------------------------------------------------------|-------------------------------------------------------------------------------------------|---------------------------------------------------------------------------------------------------------------------------------------------------------------------------------------------------------------------------------------------------------------------------------------------------------------------------------------------------------------------------------------------------------|-------------------------------------------------------------------------------------------------------------------------------------------------------------------------------------------------------------------------------------------------------------------------|
|                                          |                                                                                                                                       |                                                 | Died at hospital=68 (10.5)                                            | <p>Components:</p> <ul style="list-style-type: none"> <li>• Palliative care</li> <li>• Advance care planning</li> <li>• Allied health home care program</li> </ul>                                                                                                                    |                                                                                           | <ul style="list-style-type: none"> <li>• Time of opioids initiation – those who died at home/hospice initiated opioids 2 months earlier than those died at hospital, however, difference between groups not significant.</li> </ul>                                                                                                                                                                     |                                                                                                                                                                                                                                                                         |
|                                          |                                                                                                                                       |                                                 |                                                                       |                                                                                                                                                                                                                                                                                       |                                                                                           | <p>Healthcare utilisation:</p> <ul style="list-style-type: none"> <li>• Home care enrolment – significantly more of those who died at home/hospice used home care before death (100% vs 86%).</li> <li>• Time of home care enrolment – those who died at hospital enrolled in home care 1 month earlier than those died at home/hospice, however, difference between groups not significant.</li> </ul> |                                                                                                                                                                                      |
|                                          |                                                                                                                                       |                                                 |                                                                       |                                                                                                                                                                                                                                                                                       |                                                                                           | <p>EOL planning:</p> <ul style="list-style-type: none"> <li>• ACP – significantly more of those who died at home/hospice discussed ACP, goals of care designation, place of care, place of death, and had carer engaging in ACP discussion compared to those who died at hospital.</li> <li>• Time of ACP initiation – difference between groups not significant.</li> </ul>                            |                                                                                                                                                                                      |
| Arizono <i>et al</i> (2017) (3)<br>Japan | Compare the effects of a PR program in people with COPD and IPF on exercise capacity, dyspnoea and HR-QoL.<br><br>Apr 2008 - Mar 2012 | Pre-post study (prospective)<br><br>IPF vs COPD | IPF, COPD<br><br>52<br>IPF=24<br><br>Mean age (SD):<br>IPF=70.5 (5.9) | PR program <ul style="list-style-type: none"> <li>• Duration: 10 weeks</li> <li>• Frequency: twice/week</li> <li>• Number of sessions: 20</li> </ul> <p>Components:</p> <ul style="list-style-type: none"> <li>• Supervised exercise training</li> <li>• Patient education</li> </ul> | Outpatient <ul style="list-style-type: none"> <li>• In person</li> <li>• Group</li> </ul> | <p>Exercise/functional capacity:</p> <ul style="list-style-type: none"> <li>• 6MWD, ISWD, Wmax, endurance time, QF – improved following PR.</li> </ul> <p>Symptoms:</p> <ul style="list-style-type: none"> <li>• BDI – improved following PR.</li> </ul> <p>HR-QoL:</p> <ul style="list-style-type: none"> <li>• SGRQ – improved following PR.</li> </ul>                                               | <br><br> |

|                                              |                                                                                                                                                                                |                                                                                                                                                                                                                  |                                                                                                                                                                                                                                                                                      |                                                                                                                                                                                                                                                                                                                                                                                                                                                                                                                                                          |                                                                                          |                                                                                                                                                                                                                                                                                                                                                                                                                                                                                                                                                                                                                                                                                                                    |                                                                                       |
|----------------------------------------------|--------------------------------------------------------------------------------------------------------------------------------------------------------------------------------|------------------------------------------------------------------------------------------------------------------------------------------------------------------------------------------------------------------|--------------------------------------------------------------------------------------------------------------------------------------------------------------------------------------------------------------------------------------------------------------------------------------|----------------------------------------------------------------------------------------------------------------------------------------------------------------------------------------------------------------------------------------------------------------------------------------------------------------------------------------------------------------------------------------------------------------------------------------------------------------------------------------------------------------------------------------------------------|------------------------------------------------------------------------------------------|--------------------------------------------------------------------------------------------------------------------------------------------------------------------------------------------------------------------------------------------------------------------------------------------------------------------------------------------------------------------------------------------------------------------------------------------------------------------------------------------------------------------------------------------------------------------------------------------------------------------------------------------------------------------------------------------------------------------|---------------------------------------------------------------------------------------|
| <p>Bajwah <i>et al</i> (2015) (4)<br/>UK</p> | <p>Examine the effects of Hospital2Home program on palliative care concerns and evaluate the feasibility and acceptability of the intervention.</p> <p>Oct 2011 - Dec 2013</p> | <p>Mixed methods:</p> <ul style="list-style-type: none"> <li>Phase II fast-track RCT</li> <li>Semi-structured interviews</li> </ul> <p>Case conference within 1 week (IG) vs Case conference at 4 weeks (CG)</p> | <p>IPF (82% in CG; 85% in IG), fibrotic non-specific interstitial pneumonia</p> <p>98</p> <p>CG – patients=27; carers=26<br/>IG – patients=26; carers=19</p> <p>Mean age (SD):<br/>CG – patients=70.6 (10.3); carers=60.3 (13.1)<br/>IG – patients=67.1 (10.9); carers=61.3 (14)</p> | <p>One case conference with 3 follow ups (Hospital2Home)</p> <ul style="list-style-type: none"> <li>Duration of intervention: 2 months</li> <li>Frequency of follow ups: at 2 weeks, 1 month and 2 months</li> <li>Duration of case conference: approximately 90min</li> </ul> <p>Components:</p> <ul style="list-style-type: none"> <li>Palliative care</li> <li>Discussions of physical, psychological, social, spiritual concerns</li> <li>Individualised care plan</li> <li>EOL planning</li> <li>Goal setting</li> <li>Patient education</li> </ul> | <p>Home</p> <ul style="list-style-type: none"> <li>Remote</li> <li>Individual</li> </ul> | <p>HR-QoL:</p> <ul style="list-style-type: none"> <li>Palliative care outcome scale – palliative care concerns (symptom control, psychosocial needs, practical needs, communication and information needs) improved in IG following intervention; improvement sustained at week 8; also improved in CG once intervention was delivered.</li> <li>K-BILD – improved in IG following intervention; improvement sustained at week 8; also improved in CG once intervention was delivered.</li> <li>SGRQ – impact and total scores improved in IG following intervention; symptoms, impact and total scores also improved in CG once intervention was delivered; change in activity scores not significant.</li> </ul> |     |
|                                              |                                                                                                                                                                                |                                                                                                                                                                                                                  |                                                                                                                                                                                                                                                                                      |                                                                                                                                                                                                                                                                                                                                                                                                                                                                                                                                                          |                                                                                          | <p>Symptoms:</p> <ul style="list-style-type: none"> <li>D12 – change not significant in IG; scores improved in CG once intervention was delivered.</li> <li>MMRC – change not significant in both groups.</li> <li>Zarit Burden Inventory (measuring carer burden) – change not significant at week 4; but improved in CG once intervention was delivered.</li> </ul>                                                                                                                                                                                                                                                                                                                                              |    |
|                                              |                                                                                                                                                                                |                                                                                                                                                                                                                  |                                                                                                                                                                                                                                                                                      |                                                                                                                                                                                                                                                                                                                                                                                                                                                                                                                                                          |                                                                                          | <p>Psychological wellbeing:</p> <ul style="list-style-type: none"> <li>HADS – anxiety and depression improved in patients in IG following intervention; improvement</li> </ul>                                                                                                                                                                                                                                                                                                                                                                                                                                                                                                                                     |  |

|                                        |                                                                                                                                                         |                                                                   |                                                                                                                      |                                                                                                                                                                                                                                                                                                                                                                                                                                                                                                                                                               |                                                                                                              |                                                                                                                                                                                                                                                                         |                                                                                       |
|----------------------------------------|---------------------------------------------------------------------------------------------------------------------------------------------------------|-------------------------------------------------------------------|----------------------------------------------------------------------------------------------------------------------|---------------------------------------------------------------------------------------------------------------------------------------------------------------------------------------------------------------------------------------------------------------------------------------------------------------------------------------------------------------------------------------------------------------------------------------------------------------------------------------------------------------------------------------------------------------|--------------------------------------------------------------------------------------------------------------|-------------------------------------------------------------------------------------------------------------------------------------------------------------------------------------------------------------------------------------------------------------------------|---------------------------------------------------------------------------------------|
|                                        |                                                                                                                                                         |                                                                   |                                                                                                                      |                                                                                                                                                                                                                                                                                                                                                                                                                                                                                                                                                               |                                                                                                              | <p>sustained at week 8; also improved in CG once intervention was delivered. For carers: borderline improvement in both groups.</p>                                                                                                                                     |                                                                                       |
|                                        |                                                                                                                                                         |                                                                   |                                                                                                                      |                                                                                                                                                                                                                                                                                                                                                                                                                                                                                                                                                               |                                                                                                              | <p>EOL planning:</p> <ul style="list-style-type: none"> <li>• Preferred place of care – achieved in 100% of participants in IG compared to 84% in CG.</li> <li>• Preferred place of death – achieved in 88% of participants in IG compared to 77% in CG.</li> </ul>     |    |
| Bassi <i>et al</i> (2021) (5)<br>Italy | <p>Examine the effects of a multidisciplinary palliative care program on physical and psychological symptoms and HR-QoL.</p> <p>Oct 2016 – Sep 2019</p> | <p>RCT</p> <p>Palliative care (IG) vs No palliative care (CG)</p> | <p>Various ILD (36% IPF)</p> <p>50<br/>CG=25<br/>IG=25</p> <p>Mean age (SD):<br/>CG=77.4 (6.9)<br/>IG=74.4 (8.6)</p> | <p>Multidisciplinary palliative care with rehabilitation program</p> <ul style="list-style-type: none"> <li>• Duration: 12 months</li> <li>• Frequency: meeting with HCPs every 6 weeks</li> </ul> <p>Components:</p> <ul style="list-style-type: none"> <li>• Palliative care</li> <li>• Discussion regarding understanding of disease and prognosis</li> <li>• Establishing goals of care</li> <li>• Supervised exercise training</li> <li>• Breathing control techniques</li> <li>• Unsupervised home exercise with individualised instructions</li> </ul> | <p>Outpatient</p> <ul style="list-style-type: none"> <li>• In person/remote</li> <li>• Individual</li> </ul> | <p>Symptoms:</p> <ul style="list-style-type: none"> <li>• Borg scale – change not significant at 6 and 12 months in IG; significantly declined in CG at both time points.</li> <li>• Cough (VAS) – declined in both IG and CG at 12 months.</li> </ul>                  |    |
|                                        |                                                                                                                                                         |                                                                   |                                                                                                                      |                                                                                                                                                                                                                                                                                                                                                                                                                                                                                                                                                               |                                                                                                              | <p>Psychological wellbeing:</p> <ul style="list-style-type: none"> <li>• CES-D - change not significant at 6 and 12 months in IG; declined in CG at both time points.</li> </ul>                                                                                        |    |
|                                        |                                                                                                                                                         |                                                                   |                                                                                                                      |                                                                                                                                                                                                                                                                                                                                                                                                                                                                                                                                                               |                                                                                                              | <p>HR-QoL:</p> <ul style="list-style-type: none"> <li>• Mageri Respiratory Questionnaire – change not significant at 6 and 12 months in IG; declined in CG at 12 months.</li> </ul>                                                                                     |    |
|                                        |                                                                                                                                                         |                                                                   |                                                                                                                      |                                                                                                                                                                                                                                                                                                                                                                                                                                                                                                                                                               |                                                                                                              | <p>Exercise/functional capacity:</p> <ul style="list-style-type: none"> <li>• Chair sit-and-reach test (lower body flexibility) – change not significant in both groups.</li> <li>• 30s chair-stand test (strength) – change not significant in both groups.</li> </ul> |  |

|                                                   |                                                                                                                                                               |                                                                                                                                                              |                                                                                     |                                                                                                                                                                                                                                                                                                                                                                                                                                                                                                                                                                                                                                                                                                        |                                                                                                                     |                                                                                                                                                                                                                                                                                                                                                                                           |                                                                                                                                                                              |
|---------------------------------------------------|---------------------------------------------------------------------------------------------------------------------------------------------------------------|--------------------------------------------------------------------------------------------------------------------------------------------------------------|-------------------------------------------------------------------------------------|--------------------------------------------------------------------------------------------------------------------------------------------------------------------------------------------------------------------------------------------------------------------------------------------------------------------------------------------------------------------------------------------------------------------------------------------------------------------------------------------------------------------------------------------------------------------------------------------------------------------------------------------------------------------------------------------------------|---------------------------------------------------------------------------------------------------------------------|-------------------------------------------------------------------------------------------------------------------------------------------------------------------------------------------------------------------------------------------------------------------------------------------------------------------------------------------------------------------------------------------|------------------------------------------------------------------------------------------------------------------------------------------------------------------------------|
| <p>Bischoff <i>et al</i> (2021) (6)<br/>USA</p>   | <p>Examine the effects of a multidisciplinary palliative care model on access to palliative care including treatments and ACP.</p> <p>May 2018 – Feb 2020</p> | <p>Mixed methods:</p> <ul style="list-style-type: none"> <li>• Longitudinal</li> <li>• Open-ended interviews</li> <li>• Focus group of clinicians</li> </ul> | <p>Various ILD (15% IPF)</p> <p>31</p> <p>Mean age (95% CI): 75.8 (72.4 – 79.2)</p> | <p>Multidisciplinary specialty palliative care model including meeting with a multidisciplinary healthcare team and follow up telephone calls</p> <ul style="list-style-type: none"> <li>• Duration: median 9.9 months (ranged 2.7-19.7)</li> <li>• Number of visits: median 3 (ranged 1-9)</li> </ul> <p>Components:</p> <ul style="list-style-type: none"> <li>• Palliative care</li> <li>• Managing physical and psychological symptoms</li> <li>• Assessing and promoting function including referral to PR</li> <li>• Discussion of the disease, treatment options and prognosis</li> <li>• Psychosocial support</li> <li>• Managing medications</li> <li>• ACP and advance directives</li> </ul> | <p>Outpatient / home</p> <ul style="list-style-type: none"> <li>• In person/remote</li> <li>• Individual</li> </ul> | <p>EOL planning:</p> <ul style="list-style-type: none"> <li>• ACP and advance directives – documentation of ACP, advance directives and physician orders for life sustaining treatment increased following the intervention.</li> </ul> <p>Treatments:</p> <ul style="list-style-type: none"> <li>• Opioids – prescription of opioids for dyspnoea increased from 0% to 51.6%.</li> </ul> |                                                                                           |
| <p>Brunetti <i>et al</i> (2021) (7)<br/>Italy</p> | <p>Identify predictors of success from a PR program.</p> <p>2010 -2019</p>                                                                                    | <p>Pre-post study (retrospective audit)</p>                                                                                                                  | <p>Various ILD (45.8% IPF)</p> <p>240</p> <p>Mean age (SD): 71 (8.7)</p>            | <p>PR program</p> <ul style="list-style-type: none"> <li>• Duration: 3-4 weeks</li> <li>• Frequency: 5 times/week, ≥2 sessions/day</li> <li>• Number of sessions: mean 23 (11.3)</li> </ul> <p>Components:</p> <ul style="list-style-type: none"> <li>• Supervised exercise training</li> <li>• Patient education</li> <li>• Nutritional program</li> <li>• Psychosocial counselling</li> </ul>                                                                                                                                                                                                                                                                                                        | <p>Inpatient</p> <ul style="list-style-type: none"> <li>• In person</li> <li>• Individual</li> </ul>                | <p>Exercise/functional capacity:</p> <ul style="list-style-type: none"> <li>• 6MWD – improved following PR; improvement sustained in only 14 participants 10.3 (3.5) months after PR.</li> </ul> <p>Symptoms:</p> <ul style="list-style-type: none"> <li>• Borg scale – dyspnoea and leg fatigue improved following PR.</li> <li>• MMRC – improved following PR.</li> </ul>               | <br> |

|                                                        |                                                                                                                                                     |                                                                                                 |                                                                                               |                                                                                                                                                                                                                                                                                                                                                                                                                                                                                                                                                                                                                                                 |                                                                                                       |                                                                                                                                                                                                                                                                                                                                                                    |                                                                                       |
|--------------------------------------------------------|-----------------------------------------------------------------------------------------------------------------------------------------------------|-------------------------------------------------------------------------------------------------|-----------------------------------------------------------------------------------------------|-------------------------------------------------------------------------------------------------------------------------------------------------------------------------------------------------------------------------------------------------------------------------------------------------------------------------------------------------------------------------------------------------------------------------------------------------------------------------------------------------------------------------------------------------------------------------------------------------------------------------------------------------|-------------------------------------------------------------------------------------------------------|--------------------------------------------------------------------------------------------------------------------------------------------------------------------------------------------------------------------------------------------------------------------------------------------------------------------------------------------------------------------|---------------------------------------------------------------------------------------|
| Cerdán-de-las-Heras <i>et al</i> (2021) (8)<br>Denmark | Investigate the effect of a tele-rehabilitation program on exercise capacity.<br><br>Sep 2017 - Apr 2018                                            | RCT<br><br>Tele-rehabilitation program (IG)<br>vs<br>No tele-rehabilitation program (CG)        | IPF<br><br>29<br>CG=14<br>IG=15<br><br>Mean age (SD):<br>CG=72.4 (7.6)<br>IG=70.1 (8.8)       | Tele-rehabilitation program<br><ul style="list-style-type: none"><li>• Duration: 12 weeks</li><li>• Frequency: 3-5 times/week</li><li>• Number of sessions: 36-60</li></ul><br>Components:<br><ul style="list-style-type: none"><li>• Exercise training supervised by a virtual autonomous physiotherapist agent</li><li>• Recording of physical data and access to patient digital files</li><li>• Video consultation and chat sessions with a physiotherapist</li><li>• Patient education</li></ul><br>Materials used:<br><ul style="list-style-type: none"><li>• Mobile application</li><li>• Tablet</li><li>• E-learning packages</li></ul> | Home<br><ul style="list-style-type: none"><li>• Remote</li><li>• Individual</li></ul>                 | Exercise/functional capacity:<br><ul style="list-style-type: none"><li>• 6MWD – within group difference not significant in IG but declined in CG over the 9-month observation period. Between groups differences were significant at 3 and 6 months.</li></ul>                                                                                                     |    |
|                                                        |                                                                                                                                                     |                                                                                                 |                                                                                               |                                                                                                                                                                                                                                                                                                                                                                                                                                                                                                                                                                                                                                                 |                                                                                                       | Physical activity:<br><ul style="list-style-type: none"><li>• 7-day pedometry – difference between groups not significant over the observation period.</li><li>• 7-day vector magnitude counts per minute – difference between groups not significant over the observation period.</li></ul>                                                                       |    |
|                                                        |                                                                                                                                                     |                                                                                                 |                                                                                               |                                                                                                                                                                                                                                                                                                                                                                                                                                                                                                                                                                                                                                                 |                                                                                                       | Psychological wellbeing:<br><ul style="list-style-type: none"><li>• GAD-7 – difference between groups not significant over the observation period.</li></ul>                                                                                                                                                                                                       |    |
|                                                        |                                                                                                                                                     |                                                                                                 |                                                                                               |                                                                                                                                                                                                                                                                                                                                                                                                                                                                                                                                                                                                                                                 |                                                                                                       | HR-QoL:<br><ul style="list-style-type: none"><li>• SGRQ – difference between groups not significant over the observation period.</li><li>• K-BILD – difference between groups not significant over the observation period.</li></ul>                                                                                                                               |    |
| Chai <i>et al</i> (2022) (9)<br>Singapore              | Examine the effect of a palliative care model on healthcare utilisation, allied healthcare referrals, ACP uptake and use of palliative medications. | Cohort study (retrospective audit)<br><br>Palliative care (IG)<br>vs<br>No palliative care (CG) | Various ILD (51% IPF)<br><br>63<br>CG=37<br>IG=26<br><br>Median age (range):<br>CG=76 (69-81) | Palliative care model including visits at a palliative care clinic and home care services<br><br>Duration: 1 year<br>Frequency of visits: <i>unclear</i><br><br>Components:<br><ul style="list-style-type: none"><li>• Palliative care</li><li>• Self-management strategies for</li></ul>                                                                                                                                                                                                                                                                                                                                                       | Outpatient / home<br><ul style="list-style-type: none"><li>• In person</li><li>• Individual</li></ul> | Healthcare utilisation:<br><ul style="list-style-type: none"><li>• Hospitalisation – difference between the numbers of participants with ≥1 hospitalisation in both groups not significant.</li><li>• Referral to allied healthcare support – significantly more participants in IG were referred to dieticians, medical social workers and PR services.</li></ul> |  |

|                                         |                                                                                                                                                            |                              |                                                                  |                                                                                                                                                                                                                                                                                                                                                                                                                                                                                                                                         |                                                                                      |                                                                                                                                                                                                                                                |                                                                                     |
|-----------------------------------------|------------------------------------------------------------------------------------------------------------------------------------------------------------|------------------------------|------------------------------------------------------------------|-----------------------------------------------------------------------------------------------------------------------------------------------------------------------------------------------------------------------------------------------------------------------------------------------------------------------------------------------------------------------------------------------------------------------------------------------------------------------------------------------------------------------------------------|--------------------------------------------------------------------------------------|------------------------------------------------------------------------------------------------------------------------------------------------------------------------------------------------------------------------------------------------|-------------------------------------------------------------------------------------|
|                                         | Feb 2016 – Mar 2021                                                                                                                                        |                              | IG=72 (67-78)                                                    | <p>managing physical symptoms</p> <ul style="list-style-type: none"> <li>Understanding of disease</li> </ul>                                                                                                                                                                                                                                                                                                                                                                                                                            |                                                                                      | <p>EOL planning:</p> <ul style="list-style-type: none"> <li>ACP – significantly more participants in IG completed ACP discussions.</li> <li>Do not resuscitate order – significantly more participants in IG had an order in place.</li> </ul> |  |
|                                         |                                                                                                                                                            |                              |                                                                  |                                                                                                                                                                                                                                                                                                                                                                                                                                                                                                                                         |                                                                                      | <p>Treatments:</p> <ul style="list-style-type: none"> <li>Opioids and benzodiazepines – significantly more participants in IG started on opioids and benzodiazepines during the study period.</li> </ul>                                       |  |
| Chèhère <i>et al</i> (2019) (10) France | Investigate changes in cardiorespiratory responses during 6MWT; and identify characteristics of non-responders of a PR program.<br><br>Sep 2014 - Jun 2016 | Pre-post study (prospective) | Fibrotic IIP (63% IPF)<br><br>19<br><br>Mean age (SD):<br>65 (9) | <p>PR program</p> <ul style="list-style-type: none"> <li>Duration: 8 weeks</li> <li>Frequency: weekly</li> <li>Number of home visits: 8</li> </ul> <p>Components:</p> <ul style="list-style-type: none"> <li>Supervised exercise training</li> <li>Therapeutic patient educational sessions</li> <li>Psychosocial support</li> <li>Goal setting</li> </ul> <p>Materials used:</p> <ul style="list-style-type: none"> <li>Interactive presentations with Q &amp; A</li> <li>Card games</li> <li>Illustrated printed materials</li> </ul> | Home <ul style="list-style-type: none"> <li>In person</li> <li>Individual</li> </ul> | <p>Exercise/functional capacity:</p> <ul style="list-style-type: none"> <li>6MWD – improved following PR.</li> </ul>                                                                                                                           |  |
|                                         |                                                                                                                                                            |                              |                                                                  |                                                                                                                                                                                                                                                                                                                                                                                                                                                                                                                                         |                                                                                      | <p>Symptoms:</p> <ul style="list-style-type: none"> <li>BDI/TDI – improved following PR.</li> </ul>                                                                                                                                            |  |
|                                         |                                                                                                                                                            |                              |                                                                  |                                                                                                                                                                                                                                                                                                                                                                                                                                                                                                                                         |                                                                                      | <p>Psychological wellbeing:</p> <ul style="list-style-type: none"> <li>HADS – change not significant in anxiety and depression.</li> </ul>                                                                                                     |  |
|                                         |                                                                                                                                                            |                              |                                                                  |                                                                                                                                                                                                                                                                                                                                                                                                                                                                                                                                         |                                                                                      | <p>HR-QoL:</p> <ul style="list-style-type: none"> <li>SF-36 – physical functioning improved following PR.</li> </ul>                                                                                                                           |  |

|                                                |                                                                                                                                            |                                      |                                                                                          |                                                                                                                                                                                                                                                                                                                                                                                                                                   |                                                                                           |                                                                                                                                                                                                                                                                                                                              |                                                                                       |
|------------------------------------------------|--------------------------------------------------------------------------------------------------------------------------------------------|--------------------------------------|------------------------------------------------------------------------------------------|-----------------------------------------------------------------------------------------------------------------------------------------------------------------------------------------------------------------------------------------------------------------------------------------------------------------------------------------------------------------------------------------------------------------------------------|-------------------------------------------------------------------------------------------|------------------------------------------------------------------------------------------------------------------------------------------------------------------------------------------------------------------------------------------------------------------------------------------------------------------------------|---------------------------------------------------------------------------------------|
| da Fontoura <i>et al</i> (2018) (11)<br>Brazil | Assess completion rate of a PR program and investigate the characteristics of PR completers and non-completers.<br><br>Jan 2008 - Oct 2010 | Pre-post study (retrospective audit) | Advanced IPF referred to lung transplantation<br><br>48<br><br>Mean age (SD): 57.1 (9.7) | PR program <ul style="list-style-type: none"> <li>• Duration: 12 weeks</li> <li>• Frequency: 3 times/week</li> <li>• Number of sessions: 36 (exercise training); 6 (patient education)</li> </ul> Components: <ul style="list-style-type: none"> <li>• Supervised exercise training</li> <li>• Patient education</li> </ul>                                                                                                       | Outpatient <ul style="list-style-type: none"> <li>• In person</li> <li>• Group</li> </ul> | Exercise/functional capacity: <ul style="list-style-type: none"> <li>• 6MWD – improved following PR.</li> </ul>                                                                                                                                                                                                              |     |
|                                                |                                                                                                                                            |                                      |                                                                                          |                                                                                                                                                                                                                                                                                                                                                                                                                                   |                                                                                           | Symptoms: <ul style="list-style-type: none"> <li>• Borg scale – dyspnoea and leg fatigue improved following PR.</li> <li>• MMRC – improved following PR.</li> </ul>                                                                                                                                                          |    |
|                                                |                                                                                                                                            |                                      |                                                                                          |                                                                                                                                                                                                                                                                                                                                                                                                                                   |                                                                                           | HR-QoL: <ul style="list-style-type: none"> <li>• SF-36 – physical functioning, general health, vitality, role emotional, mental health and physical component summary scores improved following PR; change not significant in role physical, bodily pain, social functioning and mental component summary scores.</li> </ul> |    |
| Deniz <i>et al</i> (2018) (12)<br>Turkey       | Examine the impacts of PR and determine whether disease severity influences gains from a PR program.<br><br>Study period: <i>unclear</i>   | Pre-post study (prospective)         | Various ILD (66% IPF)<br><br>57<br><br>Mean age (SD): 60 (10)                            | PR program <ul style="list-style-type: none"> <li>• Duration: 8 weeks</li> <li>• Frequency: twice/week</li> <li>• Number of sessions: 16</li> </ul> Components: <ul style="list-style-type: none"> <li>• Supervised exercise training</li> <li>• Breathing, relaxation and stretching exercises</li> <li>• Patient education</li> </ul> Materials used: <ul style="list-style-type: none"> <li>• Educational materials</li> </ul> | Outpatient <ul style="list-style-type: none"> <li>• In person</li> <li>• Group</li> </ul> | Exercise/functional capacity: <ul style="list-style-type: none"> <li>• 6MWD – improved following PR.</li> </ul>                                                                                                                                                                                                              |    |
|                                                |                                                                                                                                            |                                      |                                                                                          |                                                                                                                                                                                                                                                                                                                                                                                                                                   |                                                                                           | Symptoms: <ul style="list-style-type: none"> <li>• MMRC – improved following PR.</li> <li>• Borg scale – total scores improved following PR.</li> </ul>                                                                                                                                                                      |    |
|                                                |                                                                                                                                            |                                      |                                                                                          |                                                                                                                                                                                                                                                                                                                                                                                                                                   |                                                                                           | HR-QoL: <ul style="list-style-type: none"> <li>• SGRQ – all domains improved following PR.</li> <li>• SF-36 – physical functioning, role physical, role emotional, mental health, bodily pain and vitality scores improved following PR; changes in social functioning and general health scores not significant.</li> </ul> |    |
|                                                |                                                                                                                                            |                                      |                                                                                          |                                                                                                                                                                                                                                                                                                                                                                                                                                   |                                                                                           | Psychological wellbeing: <ul style="list-style-type: none"> <li>• HADS – anxiety and depression improved following PR.</li> </ul>                                                                                                                                                                                            |  |





|                                                |                                                                                              |                              |                                                                 |                                                                                                                                                                                                                                                                                                                                                                                                                                                                                                                                                                                                                                                                                                                                                                                                                                                                                                                                                                       |                                                                                                              |                                                                                                                                                                                                                                                                                                                                                                                                                                                                                                                                                            |     |
|------------------------------------------------|----------------------------------------------------------------------------------------------|------------------------------|-----------------------------------------------------------------|-----------------------------------------------------------------------------------------------------------------------------------------------------------------------------------------------------------------------------------------------------------------------------------------------------------------------------------------------------------------------------------------------------------------------------------------------------------------------------------------------------------------------------------------------------------------------------------------------------------------------------------------------------------------------------------------------------------------------------------------------------------------------------------------------------------------------------------------------------------------------------------------------------------------------------------------------------------------------|--------------------------------------------------------------------------------------------------------------|------------------------------------------------------------------------------------------------------------------------------------------------------------------------------------------------------------------------------------------------------------------------------------------------------------------------------------------------------------------------------------------------------------------------------------------------------------------------------------------------------------------------------------------------------------|-----|
|                                                |                                                                                              |                              |                                                                 |                                                                                                                                                                                                                                                                                                                                                                                                                                                                                                                                                                                                                                                                                                                                                                                                                                                                                                                                                                       |                                                                                                              | subgroup following PR. <ul style="list-style-type: none"> <li>• UCSD-SOBQ score – change not significant.</li> <li>• Perceived symptom improvement – 50% of participants in IG reported improvement compared to 12% in CG.</li> </ul>                                                                                                                                                                                                                                                                                                                      |     |
| Duck <i>et al</i> (2015) (15)<br>UK<br>Austria | Describe the structure and benefits of IPF Care program in two countries.<br><br>2013 - 2014 | Post intervention evaluation | IPF<br><br>UK=465<br>Austria=27<br><br>Mean age: <i>unclear</i> | Patient support program for people prescribed pirfenidone including meeting with a HCP and follow up telephone calls <ul style="list-style-type: none"> <li>• Frequency:<br/>UK – 1 initial telephone call; then weekly or fortnightly for month 1; tailored to the participant thereafter.<br/>Austria – 1 initial telephone call and 1 in person meeting; then weekly or fortnightly for month 1; monthly for month 2-4; once every 4-6 weeks thereafter with additional in person meeting once every 6-8 weeks as required</li> </ul> Components: <ul style="list-style-type: none"> <li>• Patient education and support</li> <li>• IPF care meeting with other patients, family and friends, and IPF experts (Austria only)</li> </ul> Materials used: <ul style="list-style-type: none"> <li>• Information booklets</li> <li>• 'My health journal' booklet</li> <li>• Visit log (completed by nurse to document issues with the disease or treatment;</li> </ul> | Outpatient / home <ul style="list-style-type: none"> <li>• In person/remote</li> <li>• Individual</li> </ul> | Treatments: <ul style="list-style-type: none"> <li>• Participant remaining on treatment – 49% of those in the UK successfully titrated treatment to a stable dose at 19 months; 96% of those in Austria stayed on treatment for ≥ 3 months.</li> </ul> Self-efficacy: <ul style="list-style-type: none"> <li>• Participants reported higher rating on statements: 'I feel in control of my condition'; 'I know what to expect from treatment'; and 'I feel confident about how my disease is managed' 4 weeks after taking part in the program.</li> </ul> | N/A |

|                                                   |                                                                                                                                                                                            |                              |                                                                                                                  |                                                                                                                                                                                                                                                                                                                                                                                                                                                                                                                                                                                                                 |                                                                                                                                     |                                                                                                                                                                                                                                                                  |                                                                                       |
|---------------------------------------------------|--------------------------------------------------------------------------------------------------------------------------------------------------------------------------------------------|------------------------------|------------------------------------------------------------------------------------------------------------------|-----------------------------------------------------------------------------------------------------------------------------------------------------------------------------------------------------------------------------------------------------------------------------------------------------------------------------------------------------------------------------------------------------------------------------------------------------------------------------------------------------------------------------------------------------------------------------------------------------------------|-------------------------------------------------------------------------------------------------------------------------------------|------------------------------------------------------------------------------------------------------------------------------------------------------------------------------------------------------------------------------------------------------------------|---------------------------------------------------------------------------------------|
|                                                   |                                                                                                                                                                                            |                              |                                                                                                                  | participants encouraged to bring the log to their clinic appointments)                                                                                                                                                                                                                                                                                                                                                                                                                                                                                                                                          |                                                                                                                                     |                                                                                                                                                                                                                                                                  |                                                                                       |
| Edwards <i>et al</i> (2020) (16)<br>US<br>Ireland | Test the acceptability of using the patientMpower application with home spirometry and explore participants' 1-year experience of the intervention.<br><br>Study period:<br><i>unclear</i> | Post intervention evaluation | Fibrotic lung disease<br><br>US=27<br>Ireland=13<br><br>Mean age (range):<br>US=62 (31-79)<br>Ireland=64 (33-91) | Digital platform (patientMpower) to facilitate home-based spirometry and symptom monitoring <ul style="list-style-type: none"> <li>Duration: ≥ 6 weeks</li> <li>Frequency: daily spirometry</li> </ul> Components: <ul style="list-style-type: none"> <li>Self-monitoring and recording of FVC, breathlessness, step count, medication adherence, symptoms and impact of IPF on daily life</li> <li>Home spirometry</li> </ul> Materials used: <ul style="list-style-type: none"> <li>Mobile application</li> <li>Spirometer</li> <li>YouTube video training on using the application and spirometer</li> </ul> | Home <ul style="list-style-type: none"> <li>Remote</li> <li>Individual</li> </ul>                                                   | Treatments: <ul style="list-style-type: none"> <li>66% reported that the intervention helped them take the correct dose of medication at the prescribed time and achieve personal exercise goals.</li> </ul>                                                     | N/A                                                                                   |
|                                                   |                                                                                                                                                                                            |                              |                                                                                                                  |                                                                                                                                                                                                                                                                                                                                                                                                                                                                                                                                                                                                                 |                                                                                                                                     | HR-QoL: <ul style="list-style-type: none"> <li>93% reported positive effect of using the intervention on wellbeing and daily life.</li> <li>86% reported that the intervention was useful for recording the impact of PF on wellbeing and daily life.</li> </ul> | N/A                                                                                   |
| Elganady <i>et al</i> (2020) (17)<br>Egypt        | Investigate the impact of a PR program on functional capacity, dyspnoea and HR-QoL.<br><br>Study period:<br><i>unclear</i>                                                                 | Pre-post study (prospective) | Various ILD<br><br>20<br><br>Mean age (SD):<br>50.3 (8.7)                                                        | PR program <ul style="list-style-type: none"> <li>Duration: 6 weeks</li> <li>Frequency: 3 times/week</li> <li>Number of sessions: 18</li> </ul> Components: <ul style="list-style-type: none"> <li>Supervised exercise training</li> <li>Breathing exercise</li> <li>Patient education</li> <li>Instructions for disease self-management including</li> </ul>                                                                                                                                                                                                                                                   | Outpatient <ul style="list-style-type: none"> <li>In person</li> </ul> <i>Unclear whether it was in group or individual setting</i> | Exercise/functional capacity: <ul style="list-style-type: none"> <li>6MWD – improved following PR.</li> <li>Peripheral muscle strength and endurance – improved following PR.</li> </ul>                                                                         |   |
|                                                   |                                                                                                                                                                                            |                              |                                                                                                                  |                                                                                                                                                                                                                                                                                                                                                                                                                                                                                                                                                                                                                 |                                                                                                                                     | Symptoms: <ul style="list-style-type: none"> <li>MMRC – improved following PR.</li> </ul>                                                                                                                                                                        |  |
|                                                   |                                                                                                                                                                                            |                              |                                                                                                                  |                                                                                                                                                                                                                                                                                                                                                                                                                                                                                                                                                                                                                 |                                                                                                                                     | HR-QoL: <ul style="list-style-type: none"> <li>SGRQ – improved following PR.</li> </ul>                                                                                                                                                                          |  |

|                                          |                                                                                                                                                                            |                                                         |                                                                                                                                           |                                                                                                                                                                                                                                                                                                                                                       |                                                                                                                                    |                                                                                                                                                      |                                                                                       |
|------------------------------------------|----------------------------------------------------------------------------------------------------------------------------------------------------------------------------|---------------------------------------------------------|-------------------------------------------------------------------------------------------------------------------------------------------|-------------------------------------------------------------------------------------------------------------------------------------------------------------------------------------------------------------------------------------------------------------------------------------------------------------------------------------------------------|------------------------------------------------------------------------------------------------------------------------------------|------------------------------------------------------------------------------------------------------------------------------------------------------|---------------------------------------------------------------------------------------|
|                                          |                                                                                                                                                                            |                                                         |                                                                                                                                           | prevention and early recognition of an exacerbation                                                                                                                                                                                                                                                                                                   |                                                                                                                                    |                                                                                                                                                      |                                                                                       |
| Ferreira <i>et al</i> (2006) (18) USA    | Compare outcomes of a PR program in participants with or without COPD to determine whether disease aetiology influences gains from the program.<br><br>Jan 2003 - Mar 2008 | Pre-post study (retrospective audit)<br><br>ILD vs COPD | ILD, non-COPD airway disease, COPD<br><br>422<br>Non-COPD=133<br>ILD=28 (included in pre/post analysis)<br><br>Mean age:<br>Non-COPD=65.7 | PR program <ul style="list-style-type: none"> <li>Duration: 8 weeks</li> <li>Frequency: 3 times/week</li> <li>Number of sessions: 24</li> </ul> Components: <ul style="list-style-type: none"> <li>Supervised exercise training</li> <li>Patient education</li> <li>Psychosocial support</li> </ul>                                                   | Outpatient <ul style="list-style-type: none"> <li>In person</li> <li>Group/individual</li> </ul>                                   | Exercise/functional capacity: <ul style="list-style-type: none"> <li>6MWD – improved following PR.</li> </ul>                                        |    |
|                                          |                                                                                                                                                                            |                                                         |                                                                                                                                           |                                                                                                                                                                                                                                                                                                                                                       |                                                                                                                                    | HR-QoL: <ul style="list-style-type: none"> <li>CRQ – all domains improved following PR.</li> </ul>                                                   |    |
| Ferreira <i>et al</i> (2009) (19) USA    | Test whether a PR program improves functional capacity and dyspnoea, and whether certain participant's characteristics predict improvement.<br><br>Aug 1999 - Apr 2004     | Pre-post study (retrospective audit)                    | Various ILD (44% IPF)<br><br>113<br><br>Mean age (SD):<br>66 (13)                                                                         | PR program <ul style="list-style-type: none"> <li>Duration: 6-8 weeks</li> <li>Frequency: 2-3 times/week</li> <li>Number of sessions: 12-24</li> </ul> Components: <ul style="list-style-type: none"> <li>Supervised exercise training</li> <li>Pacing and breathing techniques</li> <li>Patient education</li> </ul>                                 | Outpatient <ul style="list-style-type: none"> <li>In person</li> <li>Group</li> </ul>                                              | Exercise/functional capacity: <ul style="list-style-type: none"> <li>6MWD – improved following PR.</li> </ul>                                        |    |
|                                          |                                                                                                                                                                            |                                                         |                                                                                                                                           |                                                                                                                                                                                                                                                                                                                                                       |                                                                                                                                    | Symptoms: <ul style="list-style-type: none"> <li>UCSD-SOBQ – improved following PR.</li> <li>Borg score – dyspnoea improved following PR.</li> </ul> |    |
|                                          |                                                                                                                                                                            |                                                         |                                                                                                                                           |                                                                                                                                                                                                                                                                                                                                                       |                                                                                                                                    | Psychological wellbeing: <ul style="list-style-type: none"> <li>CES-D – improved following PR.</li> </ul>                                            |    |
| Fuschillo <i>et al</i> (2018) (20) Italy | Investigate the effects of a PR program on exercise capacity measured by 6MWT and arterial blood gas analysis.<br><br>2012 - 2015                                          | Pre-post study (retrospective audit)                    | Various ILD (79% IPF)<br><br>38<br><br>Mean age (SD):<br>68.4 (9)                                                                         | PR program <ul style="list-style-type: none"> <li>Duration: 4-6 weeks</li> <li>Frequency: 5 times/week</li> <li>Number of sessions: 20-30 (exercise training); 4-6 (patient education)</li> </ul> Components: <ul style="list-style-type: none"> <li>Supervised exercise training</li> <li>Breathing techniques</li> <li>Patient education</li> </ul> | Inpatient <ul style="list-style-type: none"> <li>In person</li> </ul> <i>Unclear whether it was in group or individual setting</i> | Exercise/functional capacity: <ul style="list-style-type: none"> <li>6MWD – improved following PR.</li> </ul>                                        |   |
|                                          |                                                                                                                                                                            |                                                         |                                                                                                                                           |                                                                                                                                                                                                                                                                                                                                                       |                                                                                                                                    | Symptoms: <ul style="list-style-type: none"> <li>Borg scale – dyspnoea and leg fatigue improved following PR.</li> </ul>                             |  |

|                                                |                                                                                                                                                               |                                        |                                                                                 |                                                                                                                                                                                                                                                                                                                                                                                                                                                                                             |                                                                                                            |                                                                                                                                                                                                                                            |                                                                                       |
|------------------------------------------------|---------------------------------------------------------------------------------------------------------------------------------------------------------------|----------------------------------------|---------------------------------------------------------------------------------|---------------------------------------------------------------------------------------------------------------------------------------------------------------------------------------------------------------------------------------------------------------------------------------------------------------------------------------------------------------------------------------------------------------------------------------------------------------------------------------------|------------------------------------------------------------------------------------------------------------|--------------------------------------------------------------------------------------------------------------------------------------------------------------------------------------------------------------------------------------------|---------------------------------------------------------------------------------------|
| Gaunaurd <i>et al</i> (2014) (21)<br>USA       | Test whether a PR program increases physical activity and improves symptoms and HR-QoL.                                                                       | RCT<br><br>PR (IG)<br>vs<br>No PR (CG) | IPF<br><br>21<br>CG=10<br>IG=11<br><br>Mean age (SD):<br>CG=66 (7)<br>IG=71 (6) | PR program<br><ul style="list-style-type: none"> <li>Duration: 3 months</li> <li>Frequency: twice/week</li> <li>Number of sessions: 24 (exercise training); 10 (educational lectures)</li> </ul><br>Components:<br><ul style="list-style-type: none"> <li>Supervised exercise training</li> <li>Unsupervised home exercise program</li> <li>Patient education</li> </ul><br>Materials used:<br><ul style="list-style-type: none"> <li>Handouts</li> <li>PowerPoint presentations</li> </ul> | Outpatient<br><ul style="list-style-type: none"> <li>In person/remote</li> <li>Group/individual</li> </ul> | Physical activity:<br><ul style="list-style-type: none"> <li>IPAQ – physical activity levels significantly higher in IG during the intervention period; however difference between groups not significant at 3-month follow-up.</li> </ul> |    |
|                                                |                                                                                                                                                               |                                        |                                                                                 |                                                                                                                                                                                                                                                                                                                                                                                                                                                                                             |                                                                                                            | Symptoms:<br><ul style="list-style-type: none"> <li>BDI – change not significant.</li> </ul>                                                                                                                                               |    |
|                                                |                                                                                                                                                               |                                        |                                                                                 |                                                                                                                                                                                                                                                                                                                                                                                                                                                                                             |                                                                                                            | HR-QoL:<br><ul style="list-style-type: none"> <li>SGRQ – symptom scores improved in IG following PR while scores worsened in CG; change not significant in other domains.</li> </ul>                                                       |    |
| Grongstad <i>et al</i> (2020) (22)<br>Norway   | Examine the impact of a PR program on exercise capacity and fatigue; and examine the relationship between baseline fatigue and changes in peak oxygen uptake. | Pre-post study (prospective)           | Sarcoidosis<br><br>41<br><br>Mean age (SD):<br>53 (11)                          | PR program<br><ul style="list-style-type: none"> <li>Duration: 4 weeks</li> <li>Frequency: 2-4 times/week</li> <li>Number of sessions: 20 (individual exercise training); 16 (group exercise training); 19 (group education)</li> </ul><br>Components:<br><ul style="list-style-type: none"> <li>Individual exercise training (supervision provided ≥ once/week)</li> <li>Group exercise training</li> <li>Group education and discussions</li> </ul>                                       | Inpatient<br><ul style="list-style-type: none"> <li>In person</li> <li>Group/individual</li> </ul>         | Exercise/functional capacity:<br><ul style="list-style-type: none"> <li>6MWD – improved following PR.</li> </ul>                                                                                                                           |    |
|                                                |                                                                                                                                                               |                                        |                                                                                 |                                                                                                                                                                                                                                                                                                                                                                                                                                                                                             |                                                                                                            | Symptoms:<br><ul style="list-style-type: none"> <li>Borg scale – dyspnoea improved following PR.</li> <li>FAS – fatigue improved following PR.</li> </ul>                                                                                  |    |
| Guler <i>et al</i> (2022) (23)<br>Canada, USA, | Determine the relationship between improvement in                                                                                                             | Cohort study (retrospective audit)     | Fibrotic ILD (64% IPF)<br><br>701                                               | PR programs across 12 international sites<br><ul style="list-style-type: none"> <li>Duration: 2-4 weeks</li> </ul>                                                                                                                                                                                                                                                                                                                                                                          | Inpatient / outpatient                                                                                     | Exercise/functional capacity:<br><ul style="list-style-type: none"> <li>6MWD – improved in all PR programs with larger change from</li> </ul>                                                                                              |  |

|                                               |                                                                                                                                                                                                                                     |                                        |                                                                                                    |                                                                                                                                                                                                                                                                                                                                                                                                                                            |                                                                                                                               |                                                                                                                                                                                                                                                                                                                                                                                                                                                                                                                                                                              |                                                                                                                                                                                                                                                                     |
|-----------------------------------------------|-------------------------------------------------------------------------------------------------------------------------------------------------------------------------------------------------------------------------------------|----------------------------------------|----------------------------------------------------------------------------------------------------|--------------------------------------------------------------------------------------------------------------------------------------------------------------------------------------------------------------------------------------------------------------------------------------------------------------------------------------------------------------------------------------------------------------------------------------------|-------------------------------------------------------------------------------------------------------------------------------|------------------------------------------------------------------------------------------------------------------------------------------------------------------------------------------------------------------------------------------------------------------------------------------------------------------------------------------------------------------------------------------------------------------------------------------------------------------------------------------------------------------------------------------------------------------------------|---------------------------------------------------------------------------------------------------------------------------------------------------------------------------------------------------------------------------------------------------------------------|
| Australia, Germany and Switzerland            | 6MWT following a PR program and survival.<br><br>2000 – 2022                                                                                                                                                                        |                                        | Inpatient=196<br>Outpatient=505<br><br>Mean age (SD):<br>Inpatient=70 (11)<br>Outpatient=69 (12)   | (inpatient); 6-12 weeks (outpatient)<br><ul style="list-style-type: none"><li>• Frequency: 2-3 sessions/day; 5-6 days/week (inpatient); 2-3 sessions/week (outpatient)</li></ul> Components:<br><ul style="list-style-type: none"><li>• Supervised exercise training</li><li>• Educational sessions</li><li>• Psychological support</li><li>• Counselling on smoking cessation</li><li>• Nutritional support</li></ul>                     | <i>Unclear whether each program was delivered In person or remotely; and whether it was in an individual or group setting</i> | baseline following inpatient PR.                                                                                                                                                                                                                                                                                                                                                                                                                                                                                                                                             |                                                                                                                                                                                                                                                                     |
| Holland <i>et al</i> (2008) (24)<br>Australia | Assess the safety of an exercise training program; examine its effects on exercise capacity, HR-QoL and dyspnoea; and determine whether training response differs between those with IPF and other ILDs.<br><br>Feb 2005 - Nov 2006 | RCT<br><br>PR (IG)<br>vs<br>No PR (CG) | Various ILD (60% IPF)<br><br>57<br>CG=27<br>IG=30<br><br>Mean age (SD):<br>CG=67 (13)<br>IG=70 (8) | PR program<br><ul style="list-style-type: none"><li>• Duration: 8 weeks</li><li>• Frequency: twice/week</li><li>• Number of sessions: 16</li></ul> Components:<br><ul style="list-style-type: none"><li>• Supervised exercise training</li><li>• Unsupervised home exercise program</li><li>• Optional education and self-management program</li></ul> Materials used:<br><ul style="list-style-type: none"><li>• Exercise diary</li></ul> | Outpatient<br><ul style="list-style-type: none"><li>• In person/remote</li><li>• Group/individual</li></ul>                   | Exercise/functional capacity:<br><ul style="list-style-type: none"><li>• 6MWD, walk velocity – improved in IG.</li><li>• Wmax – change not significant.</li><li>• Perceived walking ability – 68% of participants in IG reported improvement compared to 20% in CG.</li></ul> HR-QoL:<br><ul style="list-style-type: none"><li>• SF-36 – vitality scores improved in IG.</li><li>• CRQ – dyspnoea and fatigue improved in IG; change in emotion and mastery not significant.</li></ul> Symptoms:<br><ul style="list-style-type: none"><li>• MMRC – improved in IG.</li></ul> | <br><br> |
| Holland <i>et al</i> (2012) (25)<br>Australia | Investigate the impact of disease aetiology and severity on                                                                                                                                                                         | Pre-post study (prospective)           | Various ILD (57% IPF)<br><br>44                                                                    | PR program<br><ul style="list-style-type: none"><li>• Duration: 8 weeks</li><li>• Frequency: twice/week</li></ul>                                                                                                                                                                                                                                                                                                                          | Outpatient<br><ul style="list-style-type: none"><li>• In person/remote</li></ul>                                              | Exercise/functional capacity:<br><ul style="list-style-type: none"><li>• 6MWD – improved following PR; improvement not significant 6 months after PR compared to</li></ul>                                                                                                                                                                                                                                                                                                                                                                                                   |                                                                                                                                                                                |

|                                              |                                                                                                                                                                                |                                                                                                                                   |                                                                      |                                                                                                                                                                                                                                                                                                                                                                                                                            |                                                                                                   |                                                                                                                                                                                                                                                                                                                                                                                                 |                                                                                                                                                                                                                                                                   |
|----------------------------------------------|--------------------------------------------------------------------------------------------------------------------------------------------------------------------------------|-----------------------------------------------------------------------------------------------------------------------------------|----------------------------------------------------------------------|----------------------------------------------------------------------------------------------------------------------------------------------------------------------------------------------------------------------------------------------------------------------------------------------------------------------------------------------------------------------------------------------------------------------------|---------------------------------------------------------------------------------------------------|-------------------------------------------------------------------------------------------------------------------------------------------------------------------------------------------------------------------------------------------------------------------------------------------------------------------------------------------------------------------------------------------------|-------------------------------------------------------------------------------------------------------------------------------------------------------------------------------------------------------------------------------------------------------------------|
|                                              | response to a PR program.<br><br>Jan 2007 - Dec 2008                                                                                                                           |                                                                                                                                   | Mean age (SD):<br>IPF subgroup=72.9 (6.8)<br>Other ILD=68.1 (8.4)    | <ul style="list-style-type: none"> <li>Number of sessions: 16</li> </ul> Components: <ul style="list-style-type: none"> <li>Supervised exercise training</li> <li>Unsupervised home exercise program</li> <li>Optional education and self-management program</li> </ul> Materials used: <ul style="list-style-type: none"> <li>Exercise diary</li> </ul>                                                                   | <ul style="list-style-type: none"> <li>Group/individual</li> </ul>                                | <p>baseline.</p> <p>HR-QoL:</p> <ul style="list-style-type: none"> <li>CRQ – dyspnoea improved following PR; improvement not significant 6 months after PR compared to baseline.</li> </ul>                                                                                                                                                                                                     |                                                                                                                                                                                |
| Huppmann <i>et al</i> (2013) (26)<br>Germany | Investigate the effect of a PR program on functional capacity and QoL.<br><br>Jan 1999 - May 2010                                                                              | Pre-post study (prospective)                                                                                                      | Various ILD (50% IPF)<br><br>402<br><br>Mean age (SE):<br>59.9 (0.6) | PR program <ul style="list-style-type: none"> <li>Duration: 30 days</li> <li>Frequency: 4-5 times/week (exercise training); 3 times/week (patient education)</li> <li>Number of sessions: 17-21 (individual exercise training); 12 (group patient education)</li> </ul> Components: <ul style="list-style-type: none"> <li>Supervised exercise training</li> <li>Breathing exercises</li> <li>Patient education</li> </ul> | Inpatient <ul style="list-style-type: none"> <li>In person</li> <li>Group/individual</li> </ul>   | <p>Exercise/functional capacity:</p> <ul style="list-style-type: none"> <li>6MWD – improved following PR.</li> </ul> <p>HR-QoL:</p> <ul style="list-style-type: none"> <li>SF-36 – all domains improved following PR.</li> </ul> <p>Symptoms:</p> <ul style="list-style-type: none"> <li>VAS (pre/post 6MWT) – change in dyspnoea rating not significant.</li> </ul>                            | <br><br> |
| Igai <i>et al</i> (2022) (27)<br>Japan       | Evaluate the effects of a dignity-centred palliative care program on self-esteem, QoL, anxiety, depression, dyspnoea, cough, program satisfaction and the acceptability of the | Mixed methods: <ul style="list-style-type: none"> <li>Pre-post study (prospective)</li> <li>Semi-structured interviews</li> </ul> | IPF<br><br>12<br><br>Mean age (SD):<br>77.3 (4.6)                    | Dignity-centred palliative care program including clinic and home visits <ul style="list-style-type: none"> <li>Duration: 45 days</li> <li>Frequency: 2 clinic visits; 1 home visit</li> </ul> Components: <ul style="list-style-type: none"> <li>Palliative care</li> <li>Discussion of various topics</li> </ul>                                                                                                         | Outpatient / home <ul style="list-style-type: none"> <li>In person</li> <li>Individual</li> </ul> | <p>Psychological wellbeing:</p> <ul style="list-style-type: none"> <li>Rosenberg Self-esteem scale – change not significant.</li> <li>HADS – change in anxiety and depressions not significant.</li> </ul> <p>HR-QoL:</p> <ul style="list-style-type: none"> <li>SGRQ – symptom scores improved; change not significant in other domains.</li> <li>Scoring for the program – highest</li> </ul> | <br>                                                                                    |

|                                            |                                                                                                                                          |                                                                    |                                                                                             |                                                                                                                                                                                                                                                                                                                                                              |                                                            |                                                                                                                                                                                                                                                                                  |                                                                                       |
|--------------------------------------------|------------------------------------------------------------------------------------------------------------------------------------------|--------------------------------------------------------------------|---------------------------------------------------------------------------------------------|--------------------------------------------------------------------------------------------------------------------------------------------------------------------------------------------------------------------------------------------------------------------------------------------------------------------------------------------------------------|------------------------------------------------------------|----------------------------------------------------------------------------------------------------------------------------------------------------------------------------------------------------------------------------------------------------------------------------------|---------------------------------------------------------------------------------------|
|                                            | program.<br><br>18 Apr 2018 – 18 Mar 2019                                                                                                |                                                                    |                                                                                             | including self-management, symptom management and observation, daily activities and life review<br><br>Materials used:<br>• Booklet                                                                                                                                                                                                                          |                                                            | rating in question 1) this program relieves the suffering of my illness; 2) this program will make my life better; 3) this program makes me aware of the meaning of life.<br><br>Symptoms:<br>• MMRC – change not significant.<br>• CAT– change in cough domain not significant. |    |
| Igarashi <i>et al</i> (2018) (28)<br>Japan | Evaluate the effects of a PR program and compare absolute 6MWD and percentage of the predicted value of 6MWD.<br><br>Jul 2014 – Jun 2016 | Non-randomised controlled study<br><br>PR (IG)<br>vs<br>No PR (CG) | Various ILD<br><br>40<br>CG=23<br>IG=17<br><br>Mean age (SD):<br>CG=72.8 (5)<br>IG=75 (6.4) | PR program<br>• Duration: 3 months<br>• Frequency: weekly (exercise training); monthly (patient education)<br>• Number of sessions: 12 (exercise training); 3 (patient education)<br><br>Components:<br>• Supervised exercise training<br>• Unsupervised home exercise program<br>• Patient education<br><br>Materials used:<br>• Exercise and symptom diary | Outpatient<br><br>• In person/remote<br>• Group/individual | Exercise/functional capacity:<br>• 6MWD – change in absolute distance not significant different between groups; improvement in 6MWD %predicted significantly larger in IG.<br>• Muscle strength – change not significant.                                                        |    |
|                                            |                                                                                                                                          |                                                                    |                                                                                             |                                                                                                                                                                                                                                                                                                                                                              |                                                            | Symptoms:<br>• MMRC – improved in IG.                                                                                                                                                                                                                                            |    |
|                                            |                                                                                                                                          |                                                                    |                                                                                             |                                                                                                                                                                                                                                                                                                                                                              |                                                            | HR-QoL:<br>• SGRQ – symptom scores improved in IG; no significant difference between groups in other domains.                                                                                                                                                                    |    |
| Jackson <i>et al</i> (2014) (29)<br>USA    | Test whether a PR program is effective in improving 6MWD, treadmill                                                                      | RCT<br><br>PR (IG)                                                 | *Same sample as Gaunard <i>et al</i> (2014)                                                 | * Same intervention as Gaunard <i>et al</i> (2014)<br><br>PR program                                                                                                                                                                                                                                                                                         | Outpatient<br><br>• In person/remote                       | Exercise/functional capacity:<br>• Treadmill exercise intensity – improved in IG.<br>• 6MWD – change not significant.                                                                                                                                                            |  |



|                                         |                                                                                                                                                    |                                                                                  |                                                                                       |                                                                                                                                                                                                                                                                                                                                                                                                                                                                                    |                                                                                            |                                                                                                                                                                                                                                                                                                             |                                                                                       |
|-----------------------------------------|----------------------------------------------------------------------------------------------------------------------------------------------------|----------------------------------------------------------------------------------|---------------------------------------------------------------------------------------|------------------------------------------------------------------------------------------------------------------------------------------------------------------------------------------------------------------------------------------------------------------------------------------------------------------------------------------------------------------------------------------------------------------------------------------------------------------------------------|--------------------------------------------------------------------------------------------|-------------------------------------------------------------------------------------------------------------------------------------------------------------------------------------------------------------------------------------------------------------------------------------------------------------|---------------------------------------------------------------------------------------|
|                                         | exercise, dyspnoea, exercise oxygen uptake and respiratory muscle strength.<br><br>2014                                                            | vs<br>No PR (CG)                                                                 | IPF<br><br>21<br>CG=10<br>IG=11<br><br>Mean age (SD):<br>CG=66 (7)<br>IG=71 (6)       | <ul style="list-style-type: none"> <li>Duration: 3 months</li> <li>Frequency: twice/week</li> <li>Number of sessions: 24 (exercise training); 10 (educational lectures)</li> </ul> <p>Components:</p> <ul style="list-style-type: none"> <li>Supervised exercise training</li> <li>Unsupervised home exercise program</li> <li>Patient education</li> </ul> <p>Materials used:</p> <ul style="list-style-type: none"> <li>Handouts</li> <li>PowerPoint presentations</li> </ul>    | <ul style="list-style-type: none"> <li>Group/individual</li> </ul>                         | Symptoms: <ul style="list-style-type: none"> <li>BDI – change not significant.</li> </ul>                                                                                                                                                                                                                   |    |
| Janssen <i>et al</i> (2020) (30)<br>USA | Assess the feasibility of conducting a RCT to investigate the effect of palliative care on QoL, anxiety and depression.<br><br>Sep 2017 - Jul 2018 | RCT<br><br>Palliative care program (IG)<br>vs<br>No palliative care program (CG) | IPF<br><br>22<br>CG=11<br>IG=11<br><br>Mean age (SD):<br>CG=69.5 (7.2)<br>IG=72.7 (8) | Palliative care program <ul style="list-style-type: none"> <li>Duration: 6 months</li> <li>Frequency: 1 initial clinic visit; 1 follow up visit at 3 months; ≥1 visit in between</li> <li>Number of visits: ≥3</li> </ul> <p>Components:</p> <ul style="list-style-type: none"> <li>Palliative care</li> <li>Discussions of symptoms, QoL, support network and understanding of disease</li> <li>Future planning</li> <li>Care goals setting</li> <li>Patient education</li> </ul> | Outpatient <ul style="list-style-type: none"> <li>In person</li> <li>Individual</li> </ul> | HR-QoL: <ul style="list-style-type: none"> <li>SGRQ – difference between groups not significant in impact, activity and total scores; symptom scores trended towards significant worsening in IG but not CG at 6 months.</li> <li>PHQ-9 – difference between groups not significant at 6 months.</li> </ul> |    |
|                                         |                                                                                                                                                    |                                                                                  |                                                                                       |                                                                                                                                                                                                                                                                                                                                                                                                                                                                                    |                                                                                            | Psychological wellbeing: <ul style="list-style-type: none"> <li>HADS – difference in anxiety and depression between groups not significant.</li> </ul>                                                                                                                                                      |  |
|                                         |                                                                                                                                                    |                                                                                  |                                                                                       |                                                                                                                                                                                                                                                                                                                                                                                                                                                                                    |                                                                                            | Healthcare utilisation: <ul style="list-style-type: none"> <li>Hospitalisation – no difference between groups.</li> </ul>                                                                                                                                                                                   |  |
|                                         |                                                                                                                                                    |                                                                                  |                                                                                       |                                                                                                                                                                                                                                                                                                                                                                                                                                                                                    |                                                                                            | Treatments: <ul style="list-style-type: none"> <li>Lung transplantation – no difference between groups.</li> </ul>                                                                                                                                                                                          |  |

|                                                     |                                                                                                                                                                                   |                                                                                                                |                                                                                                                 |                                                                                                                                                                                                                                                                                                                                                                                                                                                                                                                                                                                                                    |                                                                                                              |                                                                                                                                                                                                                                                                                                                                                                                                                                                                                                                                                                                                                                                                                                                                                                                                                         |                                                                                                                                                                                                                                                                                                                                                                      |
|-----------------------------------------------------|-----------------------------------------------------------------------------------------------------------------------------------------------------------------------------------|----------------------------------------------------------------------------------------------------------------|-----------------------------------------------------------------------------------------------------------------|--------------------------------------------------------------------------------------------------------------------------------------------------------------------------------------------------------------------------------------------------------------------------------------------------------------------------------------------------------------------------------------------------------------------------------------------------------------------------------------------------------------------------------------------------------------------------------------------------------------------|--------------------------------------------------------------------------------------------------------------|-------------------------------------------------------------------------------------------------------------------------------------------------------------------------------------------------------------------------------------------------------------------------------------------------------------------------------------------------------------------------------------------------------------------------------------------------------------------------------------------------------------------------------------------------------------------------------------------------------------------------------------------------------------------------------------------------------------------------------------------------------------------------------------------------------------------------|----------------------------------------------------------------------------------------------------------------------------------------------------------------------------------------------------------------------------------------------------------------------------------------------------------------------------------------------------------------------|
| <p>Jarosch <i>et al</i> (2020) (31)<br/>Germany</p> | <p>Evaluate the short term and 3-month effect of a PR program on exercise capacity and HR-QoL</p> <p>Study period:<br/><i>unclear</i></p>                                         | <p>RCT</p> <p>PR (IG)<br/>vs<br/>No PR (CG)</p>                                                                | <p>IPF</p> <p>54<br/>CG=18<br/>IG=36</p> <p>Mean age (SD):<br/>CG=65 (10)<br/>IG=68 (9)</p>                     | <p>PR program</p> <ul style="list-style-type: none"> <li>• Duration: 3 weeks</li> <li>• Frequency: 5-6 days/week (exercise training); twice/week (patient education)</li> <li>• Number of sessions: 15-18 (exercise training); 6 (patient education)</li> </ul> <p>Components:</p> <ul style="list-style-type: none"> <li>• Supervised exercise training</li> <li>• Breathing therapy</li> <li>• Patient education</li> <li>• Psychological support</li> <li>• Goal setting</li> </ul> <p>Materials used:</p> <ul style="list-style-type: none"> <li>• Handouts to facilitate physical activity at home</li> </ul> | <p>Inpatient</p> <ul style="list-style-type: none"> <li>• In person</li> <li>• Group</li> </ul>              | <p>Exercise/functional capacity:</p> <ul style="list-style-type: none"> <li>• 6MWD – improved in IG following PR; difference between groups not significant 3 months after PR.</li> </ul> <p>HR-QoL</p> <ul style="list-style-type: none"> <li>• CRQ – all domains improved in IG; improvement sustained 3 months after PR.</li> <li>• SF-36 – difference between groups in physical component not significant. Mental component improved in IG following PR; different between groups not significant 3 months after PR.</li> </ul> <p>Psychological wellbeing:</p> <ul style="list-style-type: none"> <li>• HADS – difference between groups not significant in anxiety.</li> </ul> <p>Physical activity:</p> <ul style="list-style-type: none"> <li>• Steps/day – change not significant 1 week after PR.</li> </ul> | <br><br><br><br><br><br> |
| <p>Kalluri <i>et al</i> (2018) (32)<br/>Canada</p>  | <p>Explore the relationship between the use of early integrated palliative care and acute care utilisation in the last year of life and location of death.</p> <p>2009 - 2016</p> | <p>Cohort study (retrospective audit)</p> <p>Multidisciplinary care (MDC; IG)<br/>vs<br/>Non-MDC care (CG)</p> | <p>IPF</p> <p>32<br/>IG=22<br/>CG=10</p> <p>Mean age at first visit (SD):<br/>IG=73 (12.3)<br/>CG=66 (11.4)</p> | <p>Multidisciplinary care model that adopts an early integrated palliative approach focusing on early symptom management and ACP with emphasis on community-based care</p> <ul style="list-style-type: none"> <li>• Duration: mean month between first visit and death (SD) – IG=14.4 (13.3); CG=17.4 (17)</li> <li>• Frequency: once every 3 months (clinic visits); in between clinic visits (community care team visits)</li> </ul> <p>Components:</p>                                                                                                                                                          | <p>Outpatient / home</p> <ul style="list-style-type: none"> <li>• In person</li> <li>• Individual</li> </ul> | <p>Healthcare utilisation:</p> <ul style="list-style-type: none"> <li>• ER visits and hospitalisation – IG were 24.2 times and 2.32 times less likely to have respiratory-related ER visits and hospitalisation compared to CG respectively.</li> </ul> <p>EOL planning:</p> <ul style="list-style-type: none"> <li>• ACP – 100% of IG compared to 40% of CG completed ACP.</li> <li>• Location of death – 85% of IG died in their preferred location; 90% of CG did not document preferred place of death.</li> </ul>                                                                                                                                                                                                                                                                                                  | <br><br>                                                                                                                                                                                     |

|                                            |                                                                                                                                                                             |                                                                                                                |                                                                                                                                          |                                                                                                                                                                                  |                                                                                                              |                                                                                                                                                                                                                                                                                                                                                                                                                                                                                                                                                                                                                                                                                                                                                                                                                                                                                                                                                                     |                                                                                       |
|--------------------------------------------|-----------------------------------------------------------------------------------------------------------------------------------------------------------------------------|----------------------------------------------------------------------------------------------------------------|------------------------------------------------------------------------------------------------------------------------------------------|----------------------------------------------------------------------------------------------------------------------------------------------------------------------------------|--------------------------------------------------------------------------------------------------------------|---------------------------------------------------------------------------------------------------------------------------------------------------------------------------------------------------------------------------------------------------------------------------------------------------------------------------------------------------------------------------------------------------------------------------------------------------------------------------------------------------------------------------------------------------------------------------------------------------------------------------------------------------------------------------------------------------------------------------------------------------------------------------------------------------------------------------------------------------------------------------------------------------------------------------------------------------------------------|---------------------------------------------------------------------------------------|
|                                            |                                                                                                                                                                             |                                                                                                                |                                                                                                                                          | <ul style="list-style-type: none"> <li>• Palliative care</li> <li>• Patient education</li> <li>• ACP</li> <li>• Action plans (written/verbal)</li> <li>• Goal setting</li> </ul> |                                                                                                              |                                                                                                                                                                                                                                                                                                                                                                                                                                                                                                                                                                                                                                                                                                                                                                                                                                                                                                                                                                     |                                                                                       |
| Kalluri <i>et al</i> (2020) (33)<br>Canada | Compare healthcare resource use and costs of EOL care between those receiving early integrated palliative care, specialist care and non-specialist care.<br><br>2012 - 2018 | Cohort study (retrospective audit)<br><br>MDC<br>vs<br>Specialist care (SC)<br>vs<br>Non-specialist care (NSC) | IPF<br><br>2768<br>MDC=78<br>SC=2166<br>NSC=524<br><br>Median age at death (range):<br>MDC=73 (67-83)<br>SC=79 (71-86)<br>NSC=86 (80-91) | * Same intervention as Kalluri <i>et al</i> (2018)                                                                                                                               | Outpatient / home<br><br><ul style="list-style-type: none"> <li>• In person</li> <li>• Individual</li> </ul> | Healthcare utilisation: <ul style="list-style-type: none"> <li>• Hospitalisation – MDC group was 33% less likely to die in hospital compared to SC and NSC group; but differences in length of stay were not significant between groups.</li> <li>• Time in intensive care units – lower in MDC group compared to SC group.</li> <li>• ED visits – MDC group had the smallest increase in quarterly rate of ED visit; highest in NSC group.</li> <li>• Outpatient visit – highest in MDC group.</li> <li>• General practitioner claims – lowest in MDC group.</li> <li>• EOL associated costs – median costs in the last 3 months of life and for terminal hospitalisation were lowest in MDC group.</li> <li>• PR – MDC group was almost 2 times more likely to have undergone PR compared to NSC group (81% vs 37%).</li> <li>• Long term care – MDC group was one-third as likely to be in long term care facility compared to NSC group (9% vs 30%).</li> </ul> |    |
|                                            |                                                                                                                                                                             |                                                                                                                |                                                                                                                                          |                                                                                                                                                                                  |                                                                                                              | Treatments: <ul style="list-style-type: none"> <li>• Antifibrotic – MDC group was 3 times more likely to have received</li> </ul>                                                                                                                                                                                                                                                                                                                                                                                                                                                                                                                                                                                                                                                                                                                                                                                                                                   |  |

|                                            |                                                                                                                                                                              |                                                                                                                                   |                                                                                                   |                                                                                                                                                                                                                                                                                                                                                                                                                                                  |                                                                                                         |                                                                                                                                                                                                                                                                                                                          |                                                                                       |
|--------------------------------------------|------------------------------------------------------------------------------------------------------------------------------------------------------------------------------|-----------------------------------------------------------------------------------------------------------------------------------|---------------------------------------------------------------------------------------------------|--------------------------------------------------------------------------------------------------------------------------------------------------------------------------------------------------------------------------------------------------------------------------------------------------------------------------------------------------------------------------------------------------------------------------------------------------|---------------------------------------------------------------------------------------------------------|--------------------------------------------------------------------------------------------------------------------------------------------------------------------------------------------------------------------------------------------------------------------------------------------------------------------------|---------------------------------------------------------------------------------------|
|                                            |                                                                                                                                                                              |                                                                                                                                   |                                                                                                   |                                                                                                                                                                                                                                                                                                                                                                                                                                                  |                                                                                                         | antifibrotic treatment compared to SC group.<br><ul style="list-style-type: none"> <li>Opioid – MDC group was 40% more likely to be prescribed opiates during their last year of life.</li> </ul>                                                                                                                        |                                                                                       |
| Kalluri <i>et al</i> (2021) (34)<br>Canada | Explore the effects of self-management education and action planning on self-efficacy, perceptions of symptoms and symptom management strategies.<br><br>Aug 2018 - Jan 2019 | Mixed methods: <ul style="list-style-type: none"> <li>Post intervention evaluation</li> <li>Semi-structured interviews</li> </ul> | IPF<br><br>Questionnaires=12<br>Semi-structured interviews=13<br><br>Mean age (range): 71 (59-83) | * Same intervention as Kalluri <i>et al</i> (2018) with additional focus on patient education and action planning                                                                                                                                                                                                                                                                                                                                | Outpatient / home <ul style="list-style-type: none"> <li>In person</li> <li>Individual</li> </ul>       | Self-efficacy: <ul style="list-style-type: none"> <li>COPD self-efficacy scale – 80% reported being confident in self-management; 43% reported being confident in managing or avoiding breathing difficulties; 20% reported not feeling confident.</li> </ul>                                                            | N/A                                                                                   |
|                                            |                                                                                                                                                                              |                                                                                                                                   |                                                                                                   |                                                                                                                                                                                                                                                                                                                                                                                                                                                  |                                                                                                         | Symptoms: <ul style="list-style-type: none"> <li>Measure Yourself Medical Outcome Profile – majority reported mild to moderate symptoms; 5 reported dyspnoea, 3 reported fatigue and dyspnoea, 1 reported fatigue only, 1 reported cough only, and 5 reported symptoms other than dyspnoea, cough or fatigue.</li> </ul> | N/A                                                                                   |
| Kaymaz <i>et al</i> (2013) (35)<br>Turkey  | Evaluate the effects of a PR program on exercise capacity, dyspnoea perception, HR-QoL and body composition.<br><br>2006-2009                                                | Pre-post study (retrospective audit)                                                                                              | Various ILD (50% IPF)<br><br>10<br><br>Mean age (SD): 51.3 (16.5)                                 | PR program <ul style="list-style-type: none"> <li>Duration: 8 weeks</li> <li>Frequency: twice/week (exercise training); monthly (patient education)</li> <li>Number of sessions: 16 (exercise training); 2 (patient education)</li> </ul><br>Components: <ul style="list-style-type: none"> <li>Supervised exercise training</li> <li>Unsupervised home exercise program</li> <li>Patient education</li> <li>Nutritional intervention</li> </ul> | Outpatient <ul style="list-style-type: none"> <li>In person/remote</li> <li>Group/individual</li> </ul> | Exercise/functional capacity: <ul style="list-style-type: none"> <li>ISWD, ESWD – change not significant.</li> </ul>                                                                                                                                                                                                     |    |
|                                            |                                                                                                                                                                              |                                                                                                                                   |                                                                                                   |                                                                                                                                                                                                                                                                                                                                                                                                                                                  |                                                                                                         | Symptoms: <ul style="list-style-type: none"> <li>MRC – improved following PR.</li> </ul>                                                                                                                                                                                                                                 |   |
|                                            |                                                                                                                                                                              |                                                                                                                                   |                                                                                                   |                                                                                                                                                                                                                                                                                                                                                                                                                                                  |                                                                                                         | HR-QoL: <ul style="list-style-type: none"> <li>SGRQ – impact domain improved following PR; change not significant in other domains.</li> </ul>                                                                                                                                                                           |  |
|                                            |                                                                                                                                                                              |                                                                                                                                   |                                                                                                   |                                                                                                                                                                                                                                                                                                                                                                                                                                                  |                                                                                                         | Psychological wellbeing: <ul style="list-style-type: none"> <li>HADS – anxiety and depression improved following PR.</li> </ul>                                                                                                                                                                                          |  |

|                                            |                                                                                                                                                                  |                                                                                                                                                      |                                                                                                                                                           |                                                                                                                                                                                                                                                                                                                                      |                                                                                               |                                                                                                                                                                                                                                                                                                                                                                                                                                                              |                                                                                                                                                                                                                                                                                                                                                                  |
|--------------------------------------------|------------------------------------------------------------------------------------------------------------------------------------------------------------------|------------------------------------------------------------------------------------------------------------------------------------------------------|-----------------------------------------------------------------------------------------------------------------------------------------------------------|--------------------------------------------------------------------------------------------------------------------------------------------------------------------------------------------------------------------------------------------------------------------------------------------------------------------------------------|-----------------------------------------------------------------------------------------------|--------------------------------------------------------------------------------------------------------------------------------------------------------------------------------------------------------------------------------------------------------------------------------------------------------------------------------------------------------------------------------------------------------------------------------------------------------------|------------------------------------------------------------------------------------------------------------------------------------------------------------------------------------------------------------------------------------------------------------------------------------------------------------------------------------------------------------------|
|                                            |                                                                                                                                                                  |                                                                                                                                                      |                                                                                                                                                           | <ul style="list-style-type: none"> <li>Psychological counselling</li> </ul>                                                                                                                                                                                                                                                          |                                                                                               |                                                                                                                                                                                                                                                                                                                                                                                                                                                              |                                                                                                                                                                                                                                                                                                                                                                  |
| Kerti <i>et al</i> (2018) (36)<br>Hungary  | Assess the relationship between exercise capacity and other functional markers as a response to a PR program in ILD and IPF.<br><br>Study period: <i>unclear</i> | Pre-post study (prospective)<br><br>IPF vs Non-IPF ILD                                                                                               | Various ILD (43% IPF)<br><br>53<br>ILD subgroup (excluding IPF)=30<br>IPF subgroup=23<br><br>Mean age (SD):<br>ILD subgroup=54 (8)<br>IPF subgroup=45 (9) | PR program <ul style="list-style-type: none"> <li>Duration: 4 weeks</li> <li>Frequency: 2-3 times/day</li> <li>Number of sessions: 56-84</li> </ul> Components: <ul style="list-style-type: none"> <li>Supervised exercise training</li> <li>Breathing and stretching techniques</li> </ul>                                          | Inpatient <ul style="list-style-type: none"> <li>In person</li> <li>Individual</li> </ul>     | Exercise/functional capacity: <ul style="list-style-type: none"> <li>6MWD – improved following PR in both groups.</li> <li>Grip strength – improved in ILD subgroup excluding IPF; change not significant in IPF subgroup.</li> </ul> HR-QoL: <ul style="list-style-type: none"> <li>CAT – improved following PR in both groups.</li> </ul>                                                                                                                  |                                                                                                                                                                                                                                                                               |
|                                            |                                                                                                                                                                  |                                                                                                                                                      |                                                                                                                                                           |                                                                                                                                                                                                                                                                                                                                      |                                                                                               | Symptoms: <ul style="list-style-type: none"> <li>MMRC – improved following PR in both groups.</li> </ul>                                                                                                                                                                                                                                                                                                                                                     |                                                                                                                                                                                                                                                                               |
| Keyser <i>et al</i> (2015) (37)<br>USA     | Investigate the cardiorespiratory response to a PR program including aerobic exercise training.<br><br>Feb 2009 - Jul 2012                                       | Pre-post study (prospective)                                                                                                                         | Various ILD (23% IPF)<br><br>13<br><br>Mean age (SD):<br>57 (9.1)                                                                                         | PR program <ul style="list-style-type: none"> <li>Duration: 10 weeks</li> <li>Frequency: 3 times/week</li> <li>Number of sessions: 24-30</li> </ul> Components: <ul style="list-style-type: none"> <li>Supervised exercise training</li> <li>Educational lectures</li> </ul>                                                         | Outpatient <ul style="list-style-type: none"> <li>In person</li> <li>Group</li> </ul>         | Exercise/functional capacity: <ul style="list-style-type: none"> <li>6MWD, treadmill CPET duration, Wmax – improved following PR.</li> </ul>                                                                                                                                                                                                                                                                                                                 |                                                                                                                                                                                                                                                                               |
| Khor <i>et al</i> (2021) (38)<br>Australia | Test the feasibility and acceptability of conducting a RCT to evaluate the use of a hand-held fan for dyspnoea management.<br><br>Study period: <i>unclear</i>   | Mixed methods: <ul style="list-style-type: none"> <li>RCT</li> <li>Semi-structured interviews</li> </ul> Hand-held fan (IG) vs No hand-held fan (CG) | Fibrotic ILD (33% IPF)<br><br>30<br>CG=15<br>IG=15<br><br>Mean age (SD):<br>CG=71.7 (7.3)<br>IG=73.7 (10.5)                                               | Use of hand-held fan <ul style="list-style-type: none"> <li>Duration: 2 weeks</li> </ul> <i>Frequency and number of times use depends on the participant</i><br><br>Components: <ul style="list-style-type: none"> <li>Participants received instructions to use the fan at home and during outing for symptom management</li> </ul> | Community / Home <ul style="list-style-type: none"> <li>Remote</li> <li>Individual</li> </ul> | Symptoms: <ul style="list-style-type: none"> <li>D12 – change not significant.</li> </ul> HR-QoL: <ul style="list-style-type: none"> <li>K-BILD – change not significant.</li> </ul> Self-efficacy: <ul style="list-style-type: none"> <li>Self-efficacy for Managing Chronic Disease 6-item scale – change not significant.</li> </ul> Exercise/functional capacity: <ul style="list-style-type: none"> <li>Manchester Respiratory Activities of</li> </ul> | <br><br><br> |

|                                                |                                                                                                                                                                                             |                                                        |                                                                                                                  |                                                                                                                                                                                                                                                                                                                                                                                                                                                     |                                                                                                                |                                                                                                                                                                                                                                                                                                                                          |                                                                                       |
|------------------------------------------------|---------------------------------------------------------------------------------------------------------------------------------------------------------------------------------------------|--------------------------------------------------------|------------------------------------------------------------------------------------------------------------------|-----------------------------------------------------------------------------------------------------------------------------------------------------------------------------------------------------------------------------------------------------------------------------------------------------------------------------------------------------------------------------------------------------------------------------------------------------|----------------------------------------------------------------------------------------------------------------|------------------------------------------------------------------------------------------------------------------------------------------------------------------------------------------------------------------------------------------------------------------------------------------------------------------------------------------|---------------------------------------------------------------------------------------|
|                                                |                                                                                                                                                                                             |                                                        |                                                                                                                  | <p>Materials used:</p> <ul style="list-style-type: none"> <li>Hand-held fan</li> </ul>                                                                                                                                                                                                                                                                                                                                                              |                                                                                                                | <p>Daily Living questionnaire – change not significant.</p> <ul style="list-style-type: none"> <li>UAB Study of Aging Life-Space Assessment – change not significant.</li> </ul>                                                                                                                                                         |                                                                                       |
|                                                |                                                                                                                                                                                             |                                                        |                                                                                                                  |                                                                                                                                                                                                                                                                                                                                                                                                                                                     |                                                                                                                | <p>Physical activity:</p> <ul style="list-style-type: none"> <li>Steps/day, total energy expenditure, time spent in <math>\geq 3</math> METs/day – change not significant.</li> </ul>                                                                                                                                                    |    |
| <p>Koza <i>et al</i> (2011) (39)<br/>Japan</p> | <p>Examine the effects of a PR program on exercise capacity, dyspnoea and health status in IPF; and compare the responses between IPF and COPD.</p> <p>Study period:<br/><i>unclear</i></p> | <p>Pre-post study (prospective)</p> <p>IPF vs COPD</p> | <p>IPF, COPD (as comparison group)</p> <p>90<br/>IPF=45<br/>COPD=45</p> <p>Mean age (SD):<br/>IPF=67.5 (7.8)</p> | <p>PR program</p> <ul style="list-style-type: none"> <li>Duration: 8 weeks</li> <li>Frequency: twice/week</li> <li>Number of sessions: 16</li> </ul> <p>Components:</p> <ul style="list-style-type: none"> <li>Supervised exercise training</li> <li>Breathing retraining</li> <li>Unsupervised home exercise program</li> <li>Patient education</li> </ul> <p>Materials used:</p> <ul style="list-style-type: none"> <li>Exercise diary</li> </ul> | <p>Outpatient</p> <ul style="list-style-type: none"> <li>In person/remote</li> <li>Group/individual</li> </ul> | <p>Exercise/functional capacity:</p> <ul style="list-style-type: none"> <li>6MWD – improved following PR; improvement did not sustain at 6-month.</li> <li>Muscle strength – improved following PR; improvement did not sustain at 6-month.</li> <li>ADL – improved following PR; improvement sustained at 6-month follow up.</li> </ul> |    |
|                                                |                                                                                                                                                                                             |                                                        |                                                                                                                  |                                                                                                                                                                                                                                                                                                                                                                                                                                                     |                                                                                                                | <p>Symptoms:</p> <ul style="list-style-type: none"> <li>MRC – improved following PR; change not significant at 6-month follow up compared to baseline.</li> <li>TDI – change not significant.</li> </ul>                                                                                                                                 |    |
|                                                |                                                                                                                                                                                             |                                                        |                                                                                                                  |                                                                                                                                                                                                                                                                                                                                                                                                                                                     |                                                                                                                | <p>HR-QoL:</p> <ul style="list-style-type: none"> <li>SF-36 – change not significant in all domains following PR; bodily pain, general health and social function were significantly worse at 6-month follow up compared to baseline.</li> </ul>                                                                                         |   |
| <p>Ku <i>et al</i> (2017) (40)<br/>India</p>   | <p>Investigate the effects of a PR program on exercise capacity, HR-QoL and</p>                                                                                                             | <p>RCT</p> <p>PR (IG)<br/>Vs</p>                       | <p>Various ILD (63% IPF)</p> <p>40<br/>CG=20</p>                                                                 | <p>PR program</p> <ul style="list-style-type: none"> <li>Duration: 8 weeks</li> <li>Frequency: twice/week</li> <li>Number of sessions: 16</li> </ul>                                                                                                                                                                                                                                                                                                | <p>Outpatient</p> <ul style="list-style-type: none"> <li>In person/remote</li> <li>Group/individual</li> </ul> | <p>Exercise/functional capacity:</p> <ul style="list-style-type: none"> <li>6MWD – improved in IG.</li> </ul>                                                                                                                                                                                                                            |  |
|                                                |                                                                                                                                                                                             |                                                        |                                                                                                                  |                                                                                                                                                                                                                                                                                                                                                                                                                                                     |                                                                                                                | <p>HR-QoL</p> <ul style="list-style-type: none"> <li>SGRQ – total score improved in IG.</li> </ul>                                                                                                                                                                                                                                       |  |

|                                      |                                                                                                                                                                                    |                                                                                                                                                          |                                                                                                                                                                          |                                                                                                                                                                                                                                                                                                                                                                                                                                                                                                      |                                                                                         |                                                                                                                                                                                                                                                                                                                                                                                          |                                                                                       |
|--------------------------------------|------------------------------------------------------------------------------------------------------------------------------------------------------------------------------------|----------------------------------------------------------------------------------------------------------------------------------------------------------|--------------------------------------------------------------------------------------------------------------------------------------------------------------------------|------------------------------------------------------------------------------------------------------------------------------------------------------------------------------------------------------------------------------------------------------------------------------------------------------------------------------------------------------------------------------------------------------------------------------------------------------------------------------------------------------|-----------------------------------------------------------------------------------------|------------------------------------------------------------------------------------------------------------------------------------------------------------------------------------------------------------------------------------------------------------------------------------------------------------------------------------------------------------------------------------------|---------------------------------------------------------------------------------------|
|                                      | dyspnoea.<br><br>Sep 2012 - Sep 2014                                                                                                                                               | No PR (CG)                                                                                                                                               | IG=20<br><br>Mean age (SD):<br>CG=62.1 (14.5)<br>IG=59.1 (10.4)                                                                                                          | Components:<br><ul style="list-style-type: none"> <li>Supervised exercise training</li> <li>Unsupervised home exercise program</li> <li>Patient education</li> <li>Nutritional counselling</li> <li>Psychosocial rehabilitation</li> </ul> Materials used:<br><ul style="list-style-type: none"> <li>Exercise diary</li> </ul>                                                                                                                                                                       |                                                                                         | Symptoms:<br><ul style="list-style-type: none"> <li>MRC – difference between groups not significant.</li> </ul>                                                                                                                                                                                                                                                                          |    |
| Lindell <i>et al</i> (2010) (41) USA | Test whether participation in a disease management program improves symptom burden and perceptions of QoL in people with IPF and their carers.<br><br>Study period: <i>unclear</i> | Mixed methods:<br><ul style="list-style-type: none"> <li>RCT</li> <li>Open-ended interviews</li> </ul> PRISM program (IG)<br>vs<br>No PRISM program (CG) | IPF<br><br>21 patient/carer dyads<br>CG=11<br>IG=10<br><br>Mean age (SD):<br>CG – patients=67.1 (11.9); carers=67 (8.6)<br>IG – patients=65.2 (10.3); carers=63.3 (12.7) | Disease management program (PRISM: Program to Reduce Symptoms and Improve Lifestyle Management)<br><ul style="list-style-type: none"> <li>Duration: 6 weeks</li> <li>Frequency: weekly</li> <li>Number of sessions: 6</li> </ul> Components:<br><ul style="list-style-type: none"> <li>Patient education</li> </ul> Materials used:<br><ul style="list-style-type: none"> <li>A book – ‘Feeling good: the new mood therapy’ for both groups; IG used the book in group education sessions</li> </ul> | Community<br><ul style="list-style-type: none"> <li>In person</li> <li>Group</li> </ul> | Symptoms:<br><ul style="list-style-type: none"> <li>UCSD-SOBQ – difference between groups not significant.</li> <li>BDI – difference between groups not significant.</li> </ul>                                                                                                                                                                                                          |    |
|                                      |                                                                                                                                                                                    |                                                                                                                                                          |                                                                                                                                                                          |                                                                                                                                                                                                                                                                                                                                                                                                                                                                                                      |                                                                                         | HR-QoL:<br><ul style="list-style-type: none"> <li>SF-36 – physical component worsened in patients in IG; difference between groups not significant for the mental component. For carers, difference between groups not significant in both physical and mental components.</li> </ul>                                                                                                    |    |
|                                      |                                                                                                                                                                                    |                                                                                                                                                          |                                                                                                                                                                          |                                                                                                                                                                                                                                                                                                                                                                                                                                                                                                      |                                                                                         | Psychological wellbeing:<br><ul style="list-style-type: none"> <li>Beck Anxiety and Depression Inventory – anxiety worsened in patients in IG; differences between groups not significant for depression. For carers, difference between groups not significant in both anxiety and depression.</li> <li>Perceived stress scale – improved in carers in IG; differences among</li> </ul> |  |





|                                           |                                                                                                                                             |                                      |                                                                                                      |                                                                                                                                                                                                                                                                                                                                                                                                                                                                         |                                                                                                                                                                         |                                                                                                                                                                                                                                                                                                                                                              |                                                                                       |
|-------------------------------------------|---------------------------------------------------------------------------------------------------------------------------------------------|--------------------------------------|------------------------------------------------------------------------------------------------------|-------------------------------------------------------------------------------------------------------------------------------------------------------------------------------------------------------------------------------------------------------------------------------------------------------------------------------------------------------------------------------------------------------------------------------------------------------------------------|-------------------------------------------------------------------------------------------------------------------------------------------------------------------------|--------------------------------------------------------------------------------------------------------------------------------------------------------------------------------------------------------------------------------------------------------------------------------------------------------------------------------------------------------------|---------------------------------------------------------------------------------------|
|                                           | subgroups would particularly benefit from the program.<br><br>Jan 2011 - Jan 2012                                                           |                                      | 49.1 (9.7)                                                                                           | <p>Components:</p> <ul style="list-style-type: none"> <li>Supervised exercise training</li> <li>Respiratory physiotherapy</li> <li>Patient education</li> <li>Social counselling</li> <li>Nutritional counselling</li> <li>Psychological support</li> <li>Smoking cessation program</li> <li>Ergotherapy and advice on the use of aids and appliances</li> </ul> <p>Materials used:</p> <ul style="list-style-type: none"> <li>Printed educational materials</li> </ul> |                                                                                                                                                                         | <ul style="list-style-type: none"> <li>SF-36 – physical health and mental health total scores improved following PR.</li> </ul>                                                                                                                                                                                                                              |                                                                                       |
|                                           |                                                                                                                                             |                                      |                                                                                                      |                                                                                                                                                                                                                                                                                                                                                                                                                                                                         |                                                                                                                                                                         | <p>Psychological wellbeing:</p> <ul style="list-style-type: none"> <li>HADS – anxiety and depression improved following PR.</li> </ul>                                                                                                                                                                                                                       |    |
|                                           |                                                                                                                                             |                                      |                                                                                                      |                                                                                                                                                                                                                                                                                                                                                                                                                                                                         |                                                                                                                                                                         | <p>Symptoms:</p> <ul style="list-style-type: none"> <li>MMRC – improved following PR.</li> <li>FAS – improved following PR.</li> <li>Clinical symptoms – number of participants reporting exercise intolerance, fatigue, dyspnoea, joint pain and cough reduced following PR.</li> </ul>                                                                     |    |
| Magnani <i>et al</i> (2017) (44)<br>Italy | Investigate the effects of a support group on the psychological wellbeing of people with IPF and their carers.<br><br>Jan 2015 - Jun 2015   | Pre-post study (prospective)         | <p>IPF</p> <p>18<br/>Patients=10<br/>Carers=8</p> <p>Mean age (SD):<br/>Whole cohort=66.5 (10.9)</p> | <p>Support group facilitated by an expert nurse</p> <ul style="list-style-type: none"> <li>Duration: 6 months</li> <li>Frequency: monthly</li> <li>Number of meetings: 6</li> </ul> <p>Components:</p> <ul style="list-style-type: none"> <li>Peer support</li> <li>Patient education</li> </ul>                                                                                                                                                                        | <p>Outpatient</p> <ul style="list-style-type: none"> <li>In person</li> <li>Group</li> </ul>                                                                            | <p>Psychological wellbeing:</p> <ul style="list-style-type: none"> <li>Psychological General Wellbeing Index – change not significant in all domains (anxiety; depression; positivity and wellbeing; self-control; general health; vitality; total score); anxiety scores had the largest improvement; self-control had the smallest improvement.</li> </ul> |    |
| Matsuo <i>et al</i> (2021) (45)<br>Japan  | Identify predictors of short term benefits of a PR program including timing of initiation of PR after diagnosis.<br><br>Oct 2013 – Oct 2020 | Pre-post study (retrospective audit) | <p>Fibrotic ILD (75% IPF)</p> <p>28</p> <p>Median age (range):<br/>77.5 (75.0 – 81.0)</p>            | <p>PR program</p> <ul style="list-style-type: none"> <li>Duration: 6-10 weeks</li> <li>Frequency: 5 days/week (inpatient); twice/week (outpatient)</li> <li>Number of sessions: 30-50 (inpatient); 12-20 (outpatient)</li> </ul> <p>Components:</p> <ul style="list-style-type: none"> <li>Supervised exercise training</li> </ul>                                                                                                                                      | <p>Inpatient / outpatient</p> <ul style="list-style-type: none"> <li>In person</li> </ul> <p><i>Unclear whether it was delivered in group or individual setting</i></p> | <p>Exercise/functional capacity:</p> <ul style="list-style-type: none"> <li>6MWD – change not significant.</li> </ul>                                                                                                                                                                                                                                        |  |
|                                           |                                                                                                                                             |                                      |                                                                                                      |                                                                                                                                                                                                                                                                                                                                                                                                                                                                         |                                                                                                                                                                         | <p>HR-QoL:</p> <ul style="list-style-type: none"> <li>SGRQ – change not significant.</li> </ul>                                                                                                                                                                                                                                                              |  |

|                                              |                                                                                                         |                                                        |                                                                                              |                                                                                                                                                                                                                                                                                                                                                                                                                                                                                                                                                                                                                                                                                                                                                                                         |                                                                                   |                                                                                                                                                                                                                                                                                                                                                           |                                                                                       |
|----------------------------------------------|---------------------------------------------------------------------------------------------------------|--------------------------------------------------------|----------------------------------------------------------------------------------------------|-----------------------------------------------------------------------------------------------------------------------------------------------------------------------------------------------------------------------------------------------------------------------------------------------------------------------------------------------------------------------------------------------------------------------------------------------------------------------------------------------------------------------------------------------------------------------------------------------------------------------------------------------------------------------------------------------------------------------------------------------------------------------------------------|-----------------------------------------------------------------------------------|-----------------------------------------------------------------------------------------------------------------------------------------------------------------------------------------------------------------------------------------------------------------------------------------------------------------------------------------------------------|---------------------------------------------------------------------------------------|
|                                              |                                                                                                         |                                                        |                                                                                              | <ul style="list-style-type: none"> <li>Breathing techniques</li> </ul>                                                                                                                                                                                                                                                                                                                                                                                                                                                                                                                                                                                                                                                                                                                  |                                                                                   |                                                                                                                                                                                                                                                                                                                                                           |                                                                                       |
| Moor <i>et al</i> (2020) (46)<br>Netherlands | Determine whether a home monitoring program improves QoL and medication use.<br><br>Jan 2018 - Jan 2019 | RCT<br><br>IPF online (IG)<br>vs<br>No IPF online (CG) | IPF<br><br>90<br>CG=44<br>IG=46<br><br>Median age (range):<br>CG=72 (58-84)<br>IG=70 (53-83) | Home monitoring program (IPF Online) aimed at facilitating home-based spirometry, symptom monitoring and medication management <ul style="list-style-type: none"> <li>Duration: 24 weeks</li> <li>Frequency: daily (home spirometry); weekly (reporting of symptoms)</li> </ul> Components: <ul style="list-style-type: none"> <li>Home spirometry</li> <li>Self-monitoring of symptoms and medication side effects</li> <li>Access to daily and overview of spirometry results</li> <li>Patient education</li> <li>Medication coach</li> <li>eConsultation</li> </ul> Materials used: <ul style="list-style-type: none"> <li>Mobile application</li> <li>Hand-held spirometer</li> <li>Tablet</li> <li>Video and weblink providing information about IPF and medication use</li> </ul> | Home <ul style="list-style-type: none"> <li>Remote</li> <li>Individual</li> </ul> | HR-QoL: <ul style="list-style-type: none"> <li>K-BILD – difference between groups not significant.</li> <li>EQ-5D-5L– difference between groups not significant.</li> <li>Global rating of change – IG trended towards more change, but not significant compared to CG.</li> </ul>                                                                        |    |
|                                              |                                                                                                         |                                                        |                                                                                              |                                                                                                                                                                                                                                                                                                                                                                                                                                                                                                                                                                                                                                                                                                                                                                                         |                                                                                   | Psychological wellbeing: <ul style="list-style-type: none"> <li>HADS – difference between groups not significant in anxiety and depression.</li> </ul>                                                                                                                                                                                                    |    |
|                                              |                                                                                                         |                                                        |                                                                                              |                                                                                                                                                                                                                                                                                                                                                                                                                                                                                                                                                                                                                                                                                                                                                                                         |                                                                                   | Treatments: <ul style="list-style-type: none"> <li>Patient experiences and satisfaction medication questionnaire – difference between groups not significant regarding satisfaction with medication efficacy, side effect and ease of use.</li> <li>Medication adjustments – more adjustments in IG; all adjustments were due to side effects.</li> </ul> |    |
|                                              |                                                                                                         |                                                        |                                                                                              |                                                                                                                                                                                                                                                                                                                                                                                                                                                                                                                                                                                                                                                                                                                                                                                         |                                                                                   | Healthcare utilisation: <ul style="list-style-type: none"> <li>Hospitalisation – difference between groups not significant.</li> <li>Extra hospital/general practitioner visits – difference between groups not significant.</li> </ul>                                                                                                                   |   |
| Moor <i>et al</i> (2021) (47)<br>Netherlands | Investigate the feasibility of an online home monitoring application and optimal frequency of home      | Pre-post study (prospective)                           | Sclerosis-associated ILD<br><br>10<br><br>Mean age (SD):                                     | Home spirometry and monitoring application (ILD-online) <ul style="list-style-type: none"> <li>Duration: 3 months</li> <li>Frequency: daily home spirometry for the first 6 weeks; 3 times/week for the</li> </ul>                                                                                                                                                                                                                                                                                                                                                                                                                                                                                                                                                                      | Home <ul style="list-style-type: none"> <li>Remote</li> <li>Individual</li> </ul> | HR-QoL: <ul style="list-style-type: none"> <li>K-BILD – total scores decreased.</li> <li>EQ-5D-5L – change not significant.</li> </ul>                                                                                                                                                                                                                    |  |
|                                              |                                                                                                         |                                                        |                                                                                              |                                                                                                                                                                                                                                                                                                                                                                                                                                                                                                                                                                                                                                                                                                                                                                                         |                                                                                   | Psychological wellbeing: <ul style="list-style-type: none"> <li>HADS – change not significant in</li> </ul>                                                                                                                                                                                                                                               |  |

|                                       |                                                                                                                                                                                                                                                                |                                      |                                                                                                                                          |                                                                                                                                                                                                                                                                                                                                                                                                                                                                                                                  |                                                                                                                               |                                                                                                                                                                 |                                                                                       |
|---------------------------------------|----------------------------------------------------------------------------------------------------------------------------------------------------------------------------------------------------------------------------------------------------------------|--------------------------------------|------------------------------------------------------------------------------------------------------------------------------------------|------------------------------------------------------------------------------------------------------------------------------------------------------------------------------------------------------------------------------------------------------------------------------------------------------------------------------------------------------------------------------------------------------------------------------------------------------------------------------------------------------------------|-------------------------------------------------------------------------------------------------------------------------------|-----------------------------------------------------------------------------------------------------------------------------------------------------------------|---------------------------------------------------------------------------------------|
|                                       | spirometry.<br><br>Study period:<br><i>unclear</i>                                                                                                                                                                                                             |                                      | 60.3 (9.9)                                                                                                                               | second 6 weeks<br><br>Components:<br><ul style="list-style-type: none"> <li>• Home spirometry</li> <li>• Self-monitoring and online reporting of symptoms</li> <li>• Access to an overview of spirometry results</li> <li>• Patient education</li> <li>• eConsultation</li> </ul><br>Materials used:<br><ul style="list-style-type: none"> <li>• Mobile application</li> <li>• Hand-held spirometer</li> <li>• Tablet</li> <li>• Video and weblink providing information about IPF and medication use</li> </ul> |                                                                                                                               | anxiety and depression.                                                                                                                                         |                                                                                       |
| Naji <i>et al</i> (2006) (48) Ireland | Examine the effects of a PR program on exercise tolerance, dyspnoea, HR-QoL and hospital admission rate; and determine whether the effects differ between ILD and restrictive lung disease with skeletal abnormalities.<br><br>Study period:<br><i>unclear</i> | Pre-post study (retrospective audit) | Various ILD (80% IPF), restrictive lung disease with skeletal abnormalities<br><br>46<br>ILD=35<br><br>Mean age (SD):<br>ILD=66.5 (11.3) | PR program<br><ul style="list-style-type: none"> <li>• Duration: 8 weeks</li> <li>• Frequency: twice/week</li> <li>• Number of sessions: 16</li> </ul><br>Components:<br><ul style="list-style-type: none"> <li>• Supervised exercise training</li> <li>• Breathing and relaxation techniques</li> <li>• Unsupervised home exercise program</li> <li>• Patient education</li> <li>• Nutritional counselling</li> </ul>                                                                                           | Inpatient/ outpatient<br><br><ul style="list-style-type: none"> <li>• In person/remote</li> <li>• Group/individual</li> </ul> | Exercise/functional capacity:<br><ul style="list-style-type: none"> <li>• Shuttle test distance and treadmill test duration – improved following PR.</li> </ul> |    |
|                                       |                                                                                                                                                                                                                                                                |                                      |                                                                                                                                          |                                                                                                                                                                                                                                                                                                                                                                                                                                                                                                                  |                                                                                                                               | Symptoms:<br><ul style="list-style-type: none"> <li>• CRQ – dyspnoea score improved following PR.</li> </ul>                                                    |   |
|                                       |                                                                                                                                                                                                                                                                |                                      |                                                                                                                                          |                                                                                                                                                                                                                                                                                                                                                                                                                                                                                                                  |                                                                                                                               | HR-QoL:<br><ul style="list-style-type: none"> <li>• CRQ – total score improved following PR.</li> <li>• SGRQ – improved following PR.</li> </ul>                |  |
|                                       |                                                                                                                                                                                                                                                                |                                      |                                                                                                                                          |                                                                                                                                                                                                                                                                                                                                                                                                                                                                                                                  |                                                                                                                               | Psychological wellbeing:<br><ul style="list-style-type: none"> <li>• HADS – anxiety and depression improved following PR.</li> </ul>                            |  |

|                                                  |                                                                                                                                                                                            |                                                                                                                                 |                                                                                                               |                                                                                                                                                                                                                                                                                                                                                                                                                                                                                                                      |                                                                                                                                                             |                                                                                                                                                                                                                           |                                                                                       |
|--------------------------------------------------|--------------------------------------------------------------------------------------------------------------------------------------------------------------------------------------------|---------------------------------------------------------------------------------------------------------------------------------|---------------------------------------------------------------------------------------------------------------|----------------------------------------------------------------------------------------------------------------------------------------------------------------------------------------------------------------------------------------------------------------------------------------------------------------------------------------------------------------------------------------------------------------------------------------------------------------------------------------------------------------------|-------------------------------------------------------------------------------------------------------------------------------------------------------------|---------------------------------------------------------------------------------------------------------------------------------------------------------------------------------------------------------------------------|---------------------------------------------------------------------------------------|
|                                                  |                                                                                                                                                                                            |                                                                                                                                 |                                                                                                               | <p>Materials used:</p> <ul style="list-style-type: none"> <li>Educational video on breathing and exercise training</li> <li>Exercise diary</li> <li>Comprehensive educational manual</li> </ul>                                                                                                                                                                                                                                                                                                                      |                                                                                                                                                             | <p>Healthcare utilisation:</p> <ul style="list-style-type: none"> <li>Hospital admission days – reduced in the year following PR compared with previous year.</li> </ul>                                                  |     |
| <p>Nasrat <i>et al</i> (2021) (49)<br/>Egypt</p> | <p>Investigate the effects of a PR program combined with IMT and upper extremities exercises on exercise capacity, dyspnoea, HR-QoL and pulmonary function.</p> <p>Sep 2016 – Dec 2019</p> | <p>Non-randomised controlled study</p> <p>PR combined with IMT and upper extremities exercises (IG)<br/>vs<br/>PR only (CG)</p> | <p>Various ILD</p> <p>60<br/>CG=30<br/>IG=30</p> <p>Mean age (SD):<br/>CG=42.5 (7.2)<br/>IG=43.2 (9.1)</p>    | <p>PR program with/without ITM and upper extremities exercises associated with breathing</p> <ul style="list-style-type: none"> <li>Duration: 8 weeks</li> <li>Frequency: 3 times/week</li> <li>Number of sessions: 24</li> </ul> <p>Components:</p> <ul style="list-style-type: none"> <li>Supervised exercise training</li> <li>Controlled breathing exercises</li> <li>Lung hygiene in the form of posture</li> <li>Cough training</li> <li>Percussion</li> <li>IMT combined with upper limb exercises</li> </ul> | <p>Outpatient</p> <ul style="list-style-type: none"> <li>In person</li> </ul> <p><i>Unclear whether it was delivered in group or individual setting</i></p> | <p>Exercise/functional capacity:</p> <ul style="list-style-type: none"> <li>6MWD – improved in both groups with larger improvement in IG.</li> </ul>                                                                      |    |
|                                                  |                                                                                                                                                                                            |                                                                                                                                 |                                                                                                               |                                                                                                                                                                                                                                                                                                                                                                                                                                                                                                                      |                                                                                                                                                             | <p>Symptoms:</p> <ul style="list-style-type: none"> <li>VAS – dyspnoea improved in both groups with larger improvement in IG.</li> </ul>                                                                                  |    |
|                                                  |                                                                                                                                                                                            |                                                                                                                                 |                                                                                                               |                                                                                                                                                                                                                                                                                                                                                                                                                                                                                                                      |                                                                                                                                                             | <p>HR-QoL:</p> <ul style="list-style-type: none"> <li>SF-36 – improved in both groups with larger improvement in IG.</li> </ul>                                                                                           |    |
| <p>Naz <i>et al</i> (2018) (50)<br/>Turkey</p>   | <p>Examine the effects of an exercise program on functional capacity, muscle strength, perception of dyspnoea, fatigue, , HR-QoL, anxiety, depression and lung function.</p>               | <p>RCT</p> <p>PR (IG)<br/>vs<br/>No PR (CG)</p>                                                                                 | <p>Sarcoidosis</p> <p>18<br/>CG=9<br/>IG=9</p> <p>Median age (range):<br/>CG=51 (45-57)<br/>IG=59 (52-64)</p> | <p>PR program</p> <ul style="list-style-type: none"> <li>Duration: 12 weeks</li> <li>Frequency: twice/week</li> <li>Number of sessions: 24</li> </ul> <p>Components:</p> <ul style="list-style-type: none"> <li>Supervised exercise training</li> <li>Breathing exercises</li> <li>Unsupervised home exercise</li> </ul>                                                                                                                                                                                             | <p>Outpatient</p> <ul style="list-style-type: none"> <li>In person/remote</li> <li>Group/individual</li> </ul>                                              | <p>Exercise/functional capacity:</p> <ul style="list-style-type: none"> <li>6MWD, leg and back strength – significantly more improvement in IG.</li> </ul>                                                                |  |
|                                                  |                                                                                                                                                                                            |                                                                                                                                 |                                                                                                               |                                                                                                                                                                                                                                                                                                                                                                                                                                                                                                                      |                                                                                                                                                             | <p>Symptoms:</p> <ul style="list-style-type: none"> <li>MMRC – significantly more improvement in IG.</li> <li>Borg scale – significantly more improvement in dyspnoea in IG.</li> <li>FSS – significantly more</li> </ul> |  |

|                                   |                                                                                                                   |                                                                                                                         |                                                                                                                                           |                                                                                                                                                                                                                                                                                                                                                                                                                   |                                                                                                                                                      |                                                                                                                                                                                                                                                                                                                                                                                                                                                                                                                                                                                                                                                                                                                                                                                  |                                                                                                                                                                                                                |
|-----------------------------------|-------------------------------------------------------------------------------------------------------------------|-------------------------------------------------------------------------------------------------------------------------|-------------------------------------------------------------------------------------------------------------------------------------------|-------------------------------------------------------------------------------------------------------------------------------------------------------------------------------------------------------------------------------------------------------------------------------------------------------------------------------------------------------------------------------------------------------------------|------------------------------------------------------------------------------------------------------------------------------------------------------|----------------------------------------------------------------------------------------------------------------------------------------------------------------------------------------------------------------------------------------------------------------------------------------------------------------------------------------------------------------------------------------------------------------------------------------------------------------------------------------------------------------------------------------------------------------------------------------------------------------------------------------------------------------------------------------------------------------------------------------------------------------------------------|----------------------------------------------------------------------------------------------------------------------------------------------------------------------------------------------------------------|
|                                   | May 2013 - Feb 2015                                                                                               |                                                                                                                         |                                                                                                                                           | <p>program</p> <p>Materials used:</p> <ul style="list-style-type: none"> <li>• Exercise diary</li> </ul>                                                                                                                                                                                                                                                                                                          |                                                                                                                                                      | <p>improvement in IG.</p> <p>HR-QoL:</p> <ul style="list-style-type: none"> <li>• SGRQ – significantly more improvement in symptom, activity and total scores in IG; while symptom score worsened in CG.</li> <li>• SF-36 – difference between groups not significant.</li> </ul> <p>Psychological wellbeing:</p> <ul style="list-style-type: none"> <li>• HADS – significantly more improvement in anxiety in IG; difference between groups not significant in depression.</li> </ul>                                                                                                                                                                                                                                                                                           | <br><br><br><br><br><br><br><br><br><br> |
| Near <i>et al</i> (2021) (51) USA | <p>Examine the impact of a patient support program on nintedanib persistence.</p> <p>1 Apr 2015 – 31 Jan 2018</p> | <p>Cohort study (retrospective audit)</p> <p>Enrolled in support program<br/>vs<br/>Not enrolled in support program</p> | <p>IPF</p> <p>12502<br/>Not enrolled=9388<br/>Enrolled=3114</p> <p>Mean age (SD):<br/>Not enrolled=71.7 (9.3)<br/>Enrolled=72.5 (8.3)</p> | <p>Patient support program for people with IPF treated with nintedanib</p> <p><i>Duration of program enrolment and frequency of support depends on the participant</i></p> <p>Components:</p> <ul style="list-style-type: none"> <li>• Support in learning about the disease and medication including managing disease progression, side effects, financial assistance and local resources for support</li> </ul> | <p>Community</p> <ul style="list-style-type: none"> <li>• Individual</li> </ul> <p><i>Unclear whether it was delivered in person or remotely</i></p> | <p>Treatments:</p> <ul style="list-style-type: none"> <li>• Number of participants remained on nintedanib – significantly higher proportion of participants enrolled in the program remained persistent at 6, 12, 18 and 24 months.</li> <li>• Mean time to medication discontinuation – significantly longer in participants enrolled in the program (10.9 ± 10.0 months vs 9.3 ± 9.4 months).</li> <li>• Number of nintedanib prescription refills before discontinuation – significantly higher in participants enrolled in the program (10.9 ± 9.8 vs 9.0 ± 9.0).</li> <li>• Change of dosage – significantly more participants enrolled in the program had a dose decrease compared to participants not-enrolled (61.8% vs 58.1%) during the observation period.</li> </ul> |                                                                                                                             |

|                                             |                                                                                                                                  |                                                       |                                                                                                                             |                                                                                                                                                                                                                                                                                                                                                                                                                                                       |                                                                                                         |                                                                                                                                                                                                                                                                                                                                                                       |                                                                                       |
|---------------------------------------------|----------------------------------------------------------------------------------------------------------------------------------|-------------------------------------------------------|-----------------------------------------------------------------------------------------------------------------------------|-------------------------------------------------------------------------------------------------------------------------------------------------------------------------------------------------------------------------------------------------------------------------------------------------------------------------------------------------------------------------------------------------------------------------------------------------------|---------------------------------------------------------------------------------------------------------|-----------------------------------------------------------------------------------------------------------------------------------------------------------------------------------------------------------------------------------------------------------------------------------------------------------------------------------------------------------------------|---------------------------------------------------------------------------------------|
| Nishiyama <i>et al</i> (2008) (52)<br>Japan | Investigate the effects of a PR program on functional exercise capacity, HR-QoL and pulmonary function.<br><br>2000 - 2004       | RCT<br><br>PR<br>vs<br>No PR                          | IPF<br><br>28<br>CG=15<br>IG=13<br><br>Mean age (SD):<br>CG=64.5 (9.1)<br>IG=68.1 (8.9)                                     | PR program <ul style="list-style-type: none"> <li>Duration: 10 weeks</li> <li>Frequency: twice/week</li> <li>Number of sessions: 20</li> </ul> Components: <ul style="list-style-type: none"> <li>Supervised exercise training</li> <li>Educational lectures</li> </ul>                                                                                                                                                                               | Outpatient <ul style="list-style-type: none"> <li>In person</li> <li>Group</li> </ul>                   | Exercise/functional capacity: <ul style="list-style-type: none"> <li>6MWD – improved in IG.</li> </ul>                                                                                                                                                                                                                                                                |     |
|                                             |                                                                                                                                  |                                                       |                                                                                                                             |                                                                                                                                                                                                                                                                                                                                                                                                                                                       |                                                                                                         | HR-QoL: <ul style="list-style-type: none"> <li>SGRQ – total scores significantly improved in IG.</li> </ul>                                                                                                                                                                                                                                                           |    |
|                                             |                                                                                                                                  |                                                       |                                                                                                                             |                                                                                                                                                                                                                                                                                                                                                                                                                                                       |                                                                                                         | Symptoms: <ul style="list-style-type: none"> <li>BDI – difference between groups not significant.</li> </ul>                                                                                                                                                                                                                                                          |    |
| Nolan <i>et al</i> (2022) (53)<br>UK        | Compare the responses to a PR program between those with IPF and a matched group of people with COPD.<br><br>Jun 2013 – Jul 2018 | Pre-post study (prospective)<br><br>IPF<br>vs<br>COPD | IPF, COPD (as comparison group)<br><br>326<br>IPF=163<br>COPD=163<br><br>Mean age (SD):<br>IPF=73 (9)<br>COPD=73 (8)        | PR program <ul style="list-style-type: none"> <li>Duration: 8 weeks</li> <li>Frequency: twice/week</li> <li>Number of sessions: 16</li> </ul> Components: <ul style="list-style-type: none"> <li>Supervised exercise training</li> <li>Unsupervised home exercise program</li> <li>Educational sessions</li> </ul> Materials used: <ul style="list-style-type: none"> <li>A book covering all topics addressed in the educational sessions</li> </ul> | Outpatient <ul style="list-style-type: none"> <li>In person/remote</li> <li>Group/individual</li> </ul> | Exercise/functional capacity: <ul style="list-style-type: none"> <li>ISWD – improved in both groups following PR; difference between groups not significant.</li> </ul>                                                                                                                                                                                               |    |
|                                             |                                                                                                                                  |                                                       |                                                                                                                             |                                                                                                                                                                                                                                                                                                                                                                                                                                                       |                                                                                                         | Symptoms: <ul style="list-style-type: none"> <li>MRC – improved in both groups following PR; difference between groups not significant.</li> </ul>                                                                                                                                                                                                                    |    |
|                                             |                                                                                                                                  |                                                       |                                                                                                                             |                                                                                                                                                                                                                                                                                                                                                                                                                                                       |                                                                                                         | HR-QoL: <ul style="list-style-type: none"> <li>CRQ – all domains improved in both groups following PR; difference between groups not significant.</li> <li>88% of those with IPF reported feeling “much better” or “a little better” following PR compared to 91% of those with COPD.</li> </ul>                                                                      |    |
| Ochmann <i>et al</i> (2012) (54)<br>Germany | Examine the short- and long term effects of a PR program.<br><br>2007 - 2010                                                     | Longitudinal study                                    | Asbestosis, silicosis, asthma, COPD<br><br>263<br>Asbestosis=66<br>Silicosis=42<br><br>Mean age (range):<br>Whole cohort=64 | PR program at 2 sites <ul style="list-style-type: none"> <li>Duration: 4 weeks</li> <li>Frequency: <i>unclear</i></li> <li>Number of sessions: 68</li> </ul> Components: <ul style="list-style-type: none"> <li>Supervised exercise training</li> <li>Breathing exercises</li> </ul>                                                                                                                                                                  | Inpatient <ul style="list-style-type: none"> <li>In person</li> <li>Group</li> </ul>                    | Exercise/functional capacity: <ul style="list-style-type: none"> <li>6MWD – improved in silicosis subgroup following PR; improvement sustained 3 months after PR. Did not improve in asbestosis subgroup and significantly reduced 12 months after PR compared to baseline.</li> <li>Muscle strength – improved in both silicosis and asbestosis subgroups</li> </ul> |  |

|  |  |  |         |                                                                                                            |  |                                                                                                                                                                                                                                                                                                                                                                                                                                    |                                                                                       |
|--|--|--|---------|------------------------------------------------------------------------------------------------------------|--|------------------------------------------------------------------------------------------------------------------------------------------------------------------------------------------------------------------------------------------------------------------------------------------------------------------------------------------------------------------------------------------------------------------------------------|---------------------------------------------------------------------------------------|
|  |  |  | (35-77) | <ul style="list-style-type: none"> <li>• Relaxation techniques</li> <li>• Nutritional education</li> </ul> |  | <p>following PR; improvement sustained in both subgroups 3 and 12 months after PR.</p> <ul style="list-style-type: none"> <li>• Wmax – improved in both silicosis and asbestosis subgroups following PR; improvement sustained in silicosis subgroup 3 and 12 months after PR but only sustained up to 3 months in asbestosis subgroup.</li> </ul>                                                                                 |                                                                                       |
|  |  |  |         |                                                                                                            |  | <p>Symptoms:</p> <ul style="list-style-type: none"> <li>• MRC – change not significant in both subgroups at all time points.</li> <li>• BDI/TDI – change not significant in both subgroups at all time points.</li> </ul>                                                                                                                                                                                                          |    |
|  |  |  |         |                                                                                                            |  | <p>HR-QoL:</p> <ul style="list-style-type: none"> <li>• SF-36 – physical component did not improve in silicosis subgroup at all time points. Change was only significant 3 months after PR in asbestosis subgroup compared to baseline. Change not significant in mental component in both subgroups at all time points.</li> <li>• SGRQ – change in total scores not significant in both subgroups at all time points.</li> </ul> |    |
|  |  |  |         |                                                                                                            |  | <p>Psychological wellbeing:</p> <ul style="list-style-type: none"> <li>• HADS – anxiety improved in both subgroups following PR; change not significant in both subgroups 3 and 12 months after PR compared to baseline. Change not significant in depression in both subgroups at all time points.</li> </ul>                                                                                                                     |  |
|  |  |  |         |                                                                                                            |  | <p>Healthcare utilisation:</p> <ul style="list-style-type: none"> <li>• Physician consultations – change not significant in both silicosis and</li> </ul>                                                                                                                                                                                                                                                                          |  |

|                                                  |                                                                                                                                           |                                        |                                                                                      |                                                                                                                                                                                                                                                                                                                                                                                                                                                                      |                                                                                       |                                                                                                                                                                                                       |                                                                                       |
|--------------------------------------------------|-------------------------------------------------------------------------------------------------------------------------------------------|----------------------------------------|--------------------------------------------------------------------------------------|----------------------------------------------------------------------------------------------------------------------------------------------------------------------------------------------------------------------------------------------------------------------------------------------------------------------------------------------------------------------------------------------------------------------------------------------------------------------|---------------------------------------------------------------------------------------|-------------------------------------------------------------------------------------------------------------------------------------------------------------------------------------------------------|---------------------------------------------------------------------------------------|
|                                                  |                                                                                                                                           |                                        |                                                                                      |                                                                                                                                                                                                                                                                                                                                                                                                                                                                      |                                                                                       | <p>asbestosis.</p> <ul style="list-style-type: none"> <li>Hospital admission – change not significant in both silicosis and asbestosis.</li> </ul>                                                    |                                                                                       |
|                                                  |                                                                                                                                           |                                        |                                                                                      |                                                                                                                                                                                                                                                                                                                                                                                                                                                                      |                                                                                       | <p>Treatments:</p> <ul style="list-style-type: none"> <li>Antibiotic courses – change not significant in both silicosis and asbestosis.</li> </ul>                                                    |    |
| Ozalevi <i>et al</i> (2010) (55)<br>Turkey       | Examine the effects of a home-based PR program on functional outcome measures.                                                            | Pre-post study (prospective)           | IPF<br>15<br><br>Mean age (SD): 62.8 (8.5)                                           | <p>PR program</p> <ul style="list-style-type: none"> <li>Duration: 12 weeks</li> <li>Frequency: weekly (telephone supervision; daily (exercise query)</li> <li>Number of telephone supervision: 12</li> </ul> <p>Components:</p> <ul style="list-style-type: none"> <li>Home exercise program</li> <li>Breathing and relaxation training</li> </ul> <p>Materials used:</p> <ul style="list-style-type: none"> <li>Booklet including exercise instructions</li> </ul> | Home <ul style="list-style-type: none"> <li>Remote</li> <li>Individual</li> </ul>     | <p>Exercise/functional capacity:</p> <ul style="list-style-type: none"> <li>6MWD – improved following PR.</li> </ul>                                                                                  |    |
|                                                  |                                                                                                                                           |                                        |                                                                                      |                                                                                                                                                                                                                                                                                                                                                                                                                                                                      |                                                                                       | <p>Symptoms:</p> <ul style="list-style-type: none"> <li>MMRC – improved following PR.</li> </ul>                                                                                                      |    |
|                                                  |                                                                                                                                           |                                        |                                                                                      |                                                                                                                                                                                                                                                                                                                                                                                                                                                                      |                                                                                       | <p>HR-QoL:</p> <ul style="list-style-type: none"> <li>SF-36 – general health, physical role and emotional role improved following PR; change not significant in other domains.</li> </ul>             |    |
|                                                  |                                                                                                                                           |                                        |                                                                                      |                                                                                                                                                                                                                                                                                                                                                                                                                                                                      |                                                                                       |                                                                                                                                                                                                       |                                                                                       |
| Perez-Bogerd <i>et al</i> (2018) (56)<br>Germany | Investigate the short- and long term effects of a longer PR program on exercise tolerance, muscle strength, HR-QoL and physical activity. | RCT<br><br>PR (IG)<br>vs<br>No PR (CG) | Various ILD (23% IPF)<br><br>60<br>CG=30<br>IG=30<br><br>Mean age (SD):<br>CG=64 (8) | <p>PR program</p> <ul style="list-style-type: none"> <li>Duration: 6 months</li> <li>Frequency: 3 times/week in the first 3 months; twice/week in the second 3 months</li> <li>Number of sessions: 60</li> </ul> <p>Components:</p>                                                                                                                                                                                                                                  | Outpatient <ul style="list-style-type: none"> <li>In person</li> <li>Group</li> </ul> | <p>Exercise/functional capacity:</p> <ul style="list-style-type: none"> <li>6MWD, Wmax, QF – improved following PR in IG; improvement sustained after 1 year.</li> </ul>                              |  |
|                                                  |                                                                                                                                           |                                        |                                                                                      |                                                                                                                                                                                                                                                                                                                                                                                                                                                                      |                                                                                       | <p>HR-QoL:</p> <ul style="list-style-type: none"> <li>SGRQ, CRQ – all domains improved in IG; improvement sustained in all domains of both measures except for CRQ (fatigue) after 1 year.</li> </ul> |  |



|                                             |                                                                                                                                  |                                        |                                                                                                 |                                                                                                                                                                                                                                                                                                                                                                                                                                  |                                                                                             |                                                                                                                                                                                                                                                                                                                                                                                                                                                                                                                                                                    |                                                                                                                                                                              |
|---------------------------------------------|----------------------------------------------------------------------------------------------------------------------------------|----------------------------------------|-------------------------------------------------------------------------------------------------|----------------------------------------------------------------------------------------------------------------------------------------------------------------------------------------------------------------------------------------------------------------------------------------------------------------------------------------------------------------------------------------------------------------------------------|---------------------------------------------------------------------------------------------|--------------------------------------------------------------------------------------------------------------------------------------------------------------------------------------------------------------------------------------------------------------------------------------------------------------------------------------------------------------------------------------------------------------------------------------------------------------------------------------------------------------------------------------------------------------------|------------------------------------------------------------------------------------------------------------------------------------------------------------------------------|
|                                             | Mar 2009 - Sep 2011                                                                                                              |                                        | IG=64 (13)                                                                                      | <ul style="list-style-type: none"> <li>Supervised exercise training</li> <li>Patient education</li> <li>Occupational therapy</li> <li>Nutrition counselling</li> <li>Psychosocial support</li> </ul>                                                                                                                                                                                                                             |                                                                                             | <p>Symptoms:</p> <ul style="list-style-type: none"> <li>MRC – difference between groups not significant.</li> </ul> <p>Physical activity:</p> <ul style="list-style-type: none"> <li>Steps/day – difference between groups not significant.</li> <li>Time spent in &gt;3 METs/day – difference between groups not significant.</li> </ul>                                                                                                                                                                                                                          |                                                                                            |
| Prajapat <i>et al</i> (2016) (57)<br>India  | Test whether a PR program improves functional status, muscle mass and systemic inflammation.<br><br>Study period: <i>unclear</i> | RCT<br><br>PR (IG)<br>vs<br>No PR (CG) | Various ILD<br><br>38<br>CG=20<br>IG=18<br><br>Mean age (SE):<br>CG=47.6 (2.1)<br>IG=52.2 (2.4) | PR program <ul style="list-style-type: none"> <li>Duration: 8 weeks</li> <li>Frequency: 3 days/week</li> <li>Number of sessions: 24</li> </ul> Components: <ul style="list-style-type: none"> <li>Supervised exercise training</li> <li>Patient education</li> </ul>                                                                                                                                                             | Outpatient <ul style="list-style-type: none"> <li>In person</li> <li>Group</li> </ul>       | Exercise/functional capacity: <ul style="list-style-type: none"> <li>6MWD – significantly more improvement in IG at 12 weeks.</li> </ul>                                                                                                                                                                                                                                                                                                                                                                                                                           |                                                                                           |
| Rammaert <i>et al</i> (2011) (58)<br>France | Examine the effects of a home-based PR program on exercise tolerance, dyspnoea and HR-QoL.<br><br>Apr 2007 - Feb 2008            | Pre-post study (prospective)           | IPF<br><br>17<br><br>Mean age (SD):<br>67 (13)                                                  | PR program <ul style="list-style-type: none"> <li>Duration: 8 weeks</li> <li>Frequency: weekly (home visits); daily (monitoring of heart rate)</li> </ul> Components: <ul style="list-style-type: none"> <li>Home exercise program</li> <li>Self-monitoring of heart rate during exercise</li> <li>Patient education</li> </ul> Materials used: <ul style="list-style-type: none"> <li>Picture folder and fact sheets</li> </ul> | Home <ul style="list-style-type: none"> <li>In person/remote</li> <li>Individual</li> </ul> | <p>Exercise/functional capacity:</p> <ul style="list-style-type: none"> <li>6MWD – change in distance not significant with a significant decrease in maximum heart rate.</li> <li>6MST – steps increased following PR.</li> <li>Cycle ergometer endurance time – improved following PR.</li> <li>Timed ‘up &amp; go’ test – change not significant.</li> <li>Test of 10 chair stands – change not significant.</li> </ul> <p>Symptoms:</p> <ul style="list-style-type: none"> <li>MMRC – change not significant.</li> <li>BDI – change not significant.</li> </ul> | <br> |

|                                            |                                                                                                                                                                                                                                                                  |                              |                                                                              |                                                                                                                                                                                                                                                                                                                                                               |                                                                                                                |                                                                                                                                                                                                                                                                                                                                            |                                                                                       |
|--------------------------------------------|------------------------------------------------------------------------------------------------------------------------------------------------------------------------------------------------------------------------------------------------------------------|------------------------------|------------------------------------------------------------------------------|---------------------------------------------------------------------------------------------------------------------------------------------------------------------------------------------------------------------------------------------------------------------------------------------------------------------------------------------------------------|----------------------------------------------------------------------------------------------------------------|--------------------------------------------------------------------------------------------------------------------------------------------------------------------------------------------------------------------------------------------------------------------------------------------------------------------------------------------|---------------------------------------------------------------------------------------|
|                                            |                                                                                                                                                                                                                                                                  |                              |                                                                              | <p>for self-learning</p> <ul style="list-style-type: none"> <li>Heart rate monitor</li> </ul>                                                                                                                                                                                                                                                                 |                                                                                                                | <p>HR-QoL:</p> <ul style="list-style-type: none"> <li>SF-36 – perceived physical limitation during exercise improved following PR.</li> <li>SGRQ – change not significant.</li> </ul>                                                                                                                                                      |    |
|                                            |                                                                                                                                                                                                                                                                  |                              |                                                                              |                                                                                                                                                                                                                                                                                                                                                               |                                                                                                                | <p>Psychological wellbeing:</p> <ul style="list-style-type: none"> <li>HADS – change not significant.</li> </ul>                                                                                                                                                                                                                           |    |
| Rifaat <i>et al</i> (2014) (59)<br>Egypt   | <p>Investigate the effects of a PR program on functional status and dyspnoea.</p> <p>Study period:<br/><i>unclear</i></p>                                                                                                                                        | Pre-post study (prospective) | <p>IPF</p> <p>30</p> <p>Mean age (SD):<br/>54.4 (6.1)</p>                    | <p>PR program</p> <ul style="list-style-type: none"> <li>Duration: 8 weeks</li> <li>Frequency: 3 times/week</li> <li>Number of sessions: 24</li> </ul> <p>Components:</p> <ul style="list-style-type: none"> <li>Supervised exercise training</li> <li>Breathing exercises</li> <li>Patient education</li> <li>Psychological support</li> </ul>               | <p>Outpatient</p> <ul style="list-style-type: none"> <li>In person</li> <li>Group</li> </ul>                   | <p>Exercise/functional capacity:</p> <ul style="list-style-type: none"> <li>6MWD – improved following PR.</li> </ul>                                                                                                                                                                                                                       |    |
|                                            |                                                                                                                                                                                                                                                                  |                              |                                                                              |                                                                                                                                                                                                                                                                                                                                                               |                                                                                                                | <p>Symptoms:</p> <ul style="list-style-type: none"> <li>Borg score – dyspnoea improved following PR.</li> </ul>                                                                                                                                                                                                                            |    |
|                                            |                                                                                                                                                                                                                                                                  |                              |                                                                              |                                                                                                                                                                                                                                                                                                                                                               |                                                                                                                | <p>HR-QoL:</p> <ul style="list-style-type: none"> <li>SGRQ – total scores improved following PR.</li> </ul>                                                                                                                                                                                                                                |    |
| Ryerson <i>et al</i> (2014) (60)<br>Canada | <p>Determine the short- and long term effects of PR program on functional and symptomatic outcomes; define the predictors of functional change; evaluate the relationship of changes in HR-QoL to changes in function and symptom scores.</p> <p>2010 - 2012</p> | Cohort study (prospective)   | <p>Various ILD (41% IPF)</p> <p>54</p> <p>Mean age (SD):<br/>69.4 (10.8)</p> | <p>Similar PR programs across 3 sites</p> <ul style="list-style-type: none"> <li>Duration: 6-9 weeks</li> <li>Frequency: twice/week</li> <li>Number of sessions: 12-18</li> </ul> <p>Components:</p> <ul style="list-style-type: none"> <li>Supervised exercise training</li> <li>Unsupervised home exercise program</li> <li>Educational sessions</li> </ul> | <p>Outpatient</p> <ul style="list-style-type: none"> <li>In person/remote</li> <li>Group/individual</li> </ul> | <p>Exercise/functional capacity:</p> <ul style="list-style-type: none"> <li>6MWD – improved following PR; improvement sustained at 6-month follow up.</li> <li>Global change in exercise/functional capacity – 81% of participants reported improvement following PR; minimal change at 6-month follow up compared to baseline.</li> </ul> |    |
|                                            |                                                                                                                                                                                                                                                                  |                              |                                                                              |                                                                                                                                                                                                                                                                                                                                                               |                                                                                                                | <p>Symptoms:</p> <ul style="list-style-type: none"> <li>UCSD-SOBQ – improved following PR; change not significant at 6-month follow up compared to baseline.</li> </ul>                                                                                                                                                                    |  |
|                                            |                                                                                                                                                                                                                                                                  |                              |                                                                              |                                                                                                                                                                                                                                                                                                                                                               |                                                                                                                | <p>Physical activity:</p> <ul style="list-style-type: none"> <li>Rapid Assessment of Physical Activity questionnaire – physical</li> </ul>                                                                                                                                                                                                 |  |

|                                           |                                                                                                                    |                                      |                                                                                  |                                                                                                                                                                                                                                                                                                                                                                                                                                                                                                      |                                                                                           |                                                                                                                                                                                                                                                                                          |                                                                                       |
|-------------------------------------------|--------------------------------------------------------------------------------------------------------------------|--------------------------------------|----------------------------------------------------------------------------------|------------------------------------------------------------------------------------------------------------------------------------------------------------------------------------------------------------------------------------------------------------------------------------------------------------------------------------------------------------------------------------------------------------------------------------------------------------------------------------------------------|-------------------------------------------------------------------------------------------|------------------------------------------------------------------------------------------------------------------------------------------------------------------------------------------------------------------------------------------------------------------------------------------|---------------------------------------------------------------------------------------|
|                                           |                                                                                                                    |                                      |                                                                                  |                                                                                                                                                                                                                                                                                                                                                                                                                                                                                                      |                                                                                           | activity levels improved following PR; improvement sustained at 6-month follow up.                                                                                                                                                                                                       |                                                                                       |
|                                           |                                                                                                                    |                                      |                                                                                  |                                                                                                                                                                                                                                                                                                                                                                                                                                                                                                      |                                                                                           | HR-QoL: <ul style="list-style-type: none"> <li>• SGRQ – improved following PR; improvement sustained at 6-month follow up.</li> <li>• Global change in QoL – 81% of participants reported improvement following PR; minimal change at 6-month follow up compared to baseline.</li> </ul> |    |
|                                           |                                                                                                                    |                                      |                                                                                  |                                                                                                                                                                                                                                                                                                                                                                                                                                                                                                      |                                                                                           | Psychological wellbeing: <ul style="list-style-type: none"> <li>• GDS – improved following PR; improvement sustained at 6-month follow up.</li> </ul>                                                                                                                                    |    |
| Salhi <i>et al</i> (2010) (61)<br>Germany | Test whether a PR program improves 6MWD, exercise tolerance, muscle force, dyspnoea and HR-QoL.<br><br>2000 - 2004 | Pre-post study (retrospective audit) | ILD, chest wall disease<br><br>31<br>ILD=11<br><br>Mean age (SD):<br>ILD=54 (19) | PR program <ul style="list-style-type: none"> <li>• Duration: 12 or 24 weeks</li> <li>• Frequency: <i>unclear</i></li> <li>• Number of sessions: ≤ 60 sessions over 24 weeks</li> </ul> Components: <ul style="list-style-type: none"> <li>• Supervised exercise training</li> <li>• Patient education</li> <li>• Occupational therapy including advice on ADL</li> <li>• Nutritional support</li> </ul> Materials used: <ul style="list-style-type: none"> <li>• Informational materials</li> </ul> | Outpatient <ul style="list-style-type: none"> <li>• In person</li> <li>• Group</li> </ul> | Exercise/functional capacity: <ul style="list-style-type: none"> <li>• 6MWD, Wmax – improved at both 12 and 24-week.</li> <li>• QF – change not significant at both time points compared to baseline.</li> </ul>                                                                         |    |
|                                           |                                                                                                                    |                                      |                                                                                  |                                                                                                                                                                                                                                                                                                                                                                                                                                                                                                      |                                                                                           | Symptom: <ul style="list-style-type: none"> <li>• CRQ – dyspnoea and fatigue improved at both 12 and 24-week.</li> </ul>                                                                                                                                                                 |    |
|                                           |                                                                                                                    |                                      |                                                                                  |                                                                                                                                                                                                                                                                                                                                                                                                                                                                                                      |                                                                                           | HR-QoL: <ul style="list-style-type: none"> <li>• CRQ – mastery and emotion improved at both 12 and 24-week.</li> </ul>                                                                                                                                                                   |   |
| Sanchez-Ramirez (2022) (62)               | Examine the impact of a PR program on exercise capacity,                                                           | Pre-post study (retrospective audit) | ILD, COPD, asthma, bronchiectasis, lung cancer, pulmonary                        | PR program across 3 sites <ul style="list-style-type: none"> <li>• Duration: 8 weeks</li> </ul>                                                                                                                                                                                                                                                                                                                                                                                                      | Outpatient                                                                                | Exercise/functional capacity: <ul style="list-style-type: none"> <li>• 6MWD – improved in the ILD subgroup following PR.</li> </ul>                                                                                                                                                      |  |

|                                           |                                                                                                                      |                                                                                                                                 |                                                                                                                      |                                                                                                                                                                                                                                                                                                                                                                                                                                                                                          |                                                                                                             |                                                                                                                                                                                                                                                                |                                                                                                                                                                                |
|-------------------------------------------|----------------------------------------------------------------------------------------------------------------------|---------------------------------------------------------------------------------------------------------------------------------|----------------------------------------------------------------------------------------------------------------------|------------------------------------------------------------------------------------------------------------------------------------------------------------------------------------------------------------------------------------------------------------------------------------------------------------------------------------------------------------------------------------------------------------------------------------------------------------------------------------------|-------------------------------------------------------------------------------------------------------------|----------------------------------------------------------------------------------------------------------------------------------------------------------------------------------------------------------------------------------------------------------------|--------------------------------------------------------------------------------------------------------------------------------------------------------------------------------|
| Canada                                    | HR-QoL and self-efficacy; and explore whether effects vary across different lung diseases.<br><br>2016 – 2019        |                                                                                                                                 | hypertension, other restrictive lung diseases<br><br>682<br>ILD=127<br><br>Mean age (SD):<br>Whole cohort=71.6 (9.3) | <ul style="list-style-type: none"> <li>• Frequency: twice/week</li> <li>• Number of sessions: 16</li> </ul> Components <ul style="list-style-type: none"> <li>• Supervised exercise training</li> <li>• Breathing exercise</li> <li>• Patient education</li> </ul>                                                                                                                                                                                                                       | <ul style="list-style-type: none"> <li>• In person</li> <li>• Group</li> </ul>                              | Symptoms: <ul style="list-style-type: none"> <li>• VAS – fatigue improved in the ILD subgroup following PR.</li> <li>• MRC – change not significant.</li> </ul>                                                                                                |                                                                                             |
|                                           |                                                                                                                      |                                                                                                                                 |                                                                                                                      |                                                                                                                                                                                                                                                                                                                                                                                                                                                                                          |                                                                                                             | HR-QoL: <ul style="list-style-type: none"> <li>• SGRQ – change not significant.</li> <li>• Clinical COPD questionnaire – improved in the ILD subgroup following PR.</li> </ul>                                                                                 |                                                                                             |
|                                           |                                                                                                                      |                                                                                                                                 |                                                                                                                      |                                                                                                                                                                                                                                                                                                                                                                                                                                                                                          |                                                                                                             | Self-efficacy: <ul style="list-style-type: none"> <li>• Self-efficacy for Managing Chronic Disease 6-item scale – improved in the ILD subgroup following PR.</li> </ul>                                                                                        |                                                                                             |
| Satsuma <i>et al</i> (2020) (63)<br>Japan | Assess the usefulness of an ambulatory care pharmacy practice on pirfenidone persistence.<br><br>Jan 2012 – Jan 2019 | Non-randomised controlled study<br><br>Collaborative pharmacist-physician management (IG)<br>vs<br>Conventional management (CG) | IPF<br><br>76<br>CG=61<br>IG=15<br><br>Median age (range):<br>CG=74 (68-80)<br>IG=76 (71-80)                         | Pharmacist-physician collaborative management for people treated with pirfenidone <ul style="list-style-type: none"> <li>• Duration: 3 months</li> <li>• Number of consultations with pharmacist: ≥ 2</li> </ul> Components: <ul style="list-style-type: none"> <li>• Education and support at the ambulatory care pharmacy practice to enhance effective management of medication</li> </ul> Materials used: <ul style="list-style-type: none"> <li>• Patient education book</li> </ul> | Outpatient <ul style="list-style-type: none"> <li>• In person/remote</li> <li>• Individual</li> </ul>       | Treatment: <ul style="list-style-type: none"> <li>• Discontinuation rate – lower in IG at 3 and 6 months, but differences were not significant.</li> <li>• Time to discontinuation – longer in IG.</li> </ul>                                                  |                                                                                             |
| Sciriha <i>et al</i> (2019) (64)<br>Malta | Investigate the effects of a PR program on functional and HR-QoL measures.                                           | Non-randomised controlled study<br><br>Active group<br>vs<br>Non-active group                                                   | Various ILD (>70% IPF)<br><br>120<br>Active group=60<br>Inactive group=60                                            | PR program <ul style="list-style-type: none"> <li>• Duration: 12 weeks</li> <li>• Frequency: twice/week</li> <li>• Number of sessions: 24</li> </ul>                                                                                                                                                                                                                                                                                                                                     | Outpatient <ul style="list-style-type: none"> <li>• In person/remote</li> <li>• Group/individual</li> </ul> | Exercise/functional capacity: <ul style="list-style-type: none"> <li>• 6MWD – improved following PR in the active group.</li> </ul> Symptoms: <ul style="list-style-type: none"> <li>• Borg score – dyspnoea improved in active group following PR.</li> </ul> | <br> |

|                                          |                                                                                                                                                        |                                                                                                                                            |                                                                      |                                                                                                                                                                                                                                                                                                                                                                                                                                                                                                                                      |            |                                                                                                                                                                                       |                                                                                                                                                                                                                                                                                                                                                                       |                                                                                       |
|------------------------------------------|--------------------------------------------------------------------------------------------------------------------------------------------------------|--------------------------------------------------------------------------------------------------------------------------------------------|----------------------------------------------------------------------|--------------------------------------------------------------------------------------------------------------------------------------------------------------------------------------------------------------------------------------------------------------------------------------------------------------------------------------------------------------------------------------------------------------------------------------------------------------------------------------------------------------------------------------|------------|---------------------------------------------------------------------------------------------------------------------------------------------------------------------------------------|-----------------------------------------------------------------------------------------------------------------------------------------------------------------------------------------------------------------------------------------------------------------------------------------------------------------------------------------------------------------------|---------------------------------------------------------------------------------------|
|                                          | Study period:<br><i>unclear</i>                                                                                                                        |                                                                                                                                            | Mean age: <i>unclear</i>                                             | <p>Components:</p> <ul style="list-style-type: none"> <li>Supervised exercise training</li> <li>Unsupervised home exercise program</li> <li>Patient education</li> </ul> <p>Materials used:</p> <ul style="list-style-type: none"> <li>Exercise diary</li> </ul>                                                                                                                                                                                                                                                                     |            | <ul style="list-style-type: none"> <li>MMRC – improved in active group following PR.</li> </ul>                                                                                       |                                                                                                                                                                                                                                                                                                                                                                       |                                                                                       |
|                                          |                                                                                                                                                        |                                                                                                                                            |                                                                      |                                                                                                                                                                                                                                                                                                                                                                                                                                                                                                                                      |            | HR-QoL:                                                                                                                                                                               |                                                                                                                                                                                                                                                                                    |                                                                                       |
|                                          |                                                                                                                                                        |                                                                                                                                            |                                                                      |                                                                                                                                                                                                                                                                                                                                                                                                                                                                                                                                      |            | <ul style="list-style-type: none"> <li>SGRQ – impact and total scores improved in active group following PR; change not significant for the activity and symptoms domains.</li> </ul> |                                                                                                                                                                                                                                                                                                                                                                       |                                                                                       |
|                                          |                                                                                                                                                        |                                                                                                                                            |                                                                      |                                                                                                                                                                                                                                                                                                                                                                                                                                                                                                                                      |            | Psychological wellbeing:                                                                                                                                                              |                                                                                                                                                                                                                                                                                    |                                                                                       |
|                                          |                                                                                                                                                        |                                                                                                                                            |                                                                      |                                                                                                                                                                                                                                                                                                                                                                                                                                                                                                                                      |            | <ul style="list-style-type: none"> <li>HADS – change in anxiety and depression not significant compared to baseline.</li> </ul>                                                       |                                                                                                                                                                                                                                                                                                                                                                       |                                                                                       |
| Sgalla <i>et al</i> (2015) (65)<br>Italy | Evaluate the safety and feasibility of a mindfulness based stress reduction program and investigate its impact on mood, HR-QoL and pulmonary function. | Pre-post study (prospective)                                                                                                               | Various ILD (63% IPF)<br><br>19<br><br>Mean age (SD):<br>65 (8)      | <p>Mindfulness based stress reduction program</p> <ul style="list-style-type: none"> <li>Duration: 8 weeks</li> <li>Frequency: weekly (during intervention period); quarterly (during post-intervention observation period)</li> <li>Number of sessions: 12</li> </ul> <p>Components:</p> <ul style="list-style-type: none"> <li>Mindfulness techniques with a focus on controlled breathing</li> <li>Unsupervised home practise</li> </ul> <p>Materials used:</p> <ul style="list-style-type: none"> <li>Mindfulness CDs</li> </ul> | Outpatient | <ul style="list-style-type: none"> <li>In person</li> <li>Group</li> </ul>                                                                                                            | <p>Psychological wellbeing:</p> <ul style="list-style-type: none"> <li>Profile of mood state – fatigue, depression, anger and vigour improved at study completion; change not significant in tension.</li> <li>Perceived stress scale – control of irritation, uncontrollable anger, anger, irritability, and self-control improved over the study period.</li> </ul> |    |
|                                          | Nov 2012 - Nov 2013                                                                                                                                    |                                                                                                                                            |                                                                      |                                                                                                                                                                                                                                                                                                                                                                                                                                                                                                                                      |            | Symptoms:                                                                                                                                                                             |                                                                                                                                                                                                                                                                                    |                                                                                       |
|                                          |                                                                                                                                                        |                                                                                                                                            |                                                                      |                                                                                                                                                                                                                                                                                                                                                                                                                                                                                                                                      |            | <ul style="list-style-type: none"> <li>UCSD-SOBQ – change not significant.</li> <li>Cough and Sputum Assessment Questionnaire – change not significant.</li> </ul>                    |                                                                                                                                                                                                                                                                                                                                                                       |                                                                                       |
|                                          |                                                                                                                                                        |                                                                                                                                            |                                                                      |                                                                                                                                                                                                                                                                                                                                                                                                                                                                                                                                      |            | Exercise/functional capacity:                                                                                                                                                         |                                                                                                                                                                                                                                                                                  |                                                                                       |
|                                          |                                                                                                                                                        |                                                                                                                                            |                                                                      |                                                                                                                                                                                                                                                                                                                                                                                                                                                                                                                                      |            | <ul style="list-style-type: none"> <li>6MWD – change not significant.</li> </ul>                                                                                                      |                                                                                                                                                                                                                                                                                                                                                                       |                                                                                       |
| Sharp <i>et al</i> (2017) (66)<br>UK     | Determine the sustained benefits of a PR program; identify baseline characteristics associated with the responses; and evaluate PR                     | Mixed methods: <ul style="list-style-type: none"> <li>Pre-post study (retrospective audit)</li> <li>Semi-structured focus group</li> </ul> | Various ILD (35% IPF)<br><br>79<br><br>Mean age (SD):<br>68.8 (11.9) | <p>PR program</p> <ul style="list-style-type: none"> <li>Duration: 6 weeks</li> <li>Frequency: twice/week</li> <li>Number of sessions: 12</li> </ul> <p>Components:</p> <ul style="list-style-type: none"> <li>Supervised exercise training</li> </ul>                                                                                                                                                                                                                                                                               | Outpatient | <ul style="list-style-type: none"> <li>In person/remote</li> <li>Group/individual</li> </ul>                                                                                          | <p>Exercise/functional capacity:</p> <ul style="list-style-type: none"> <li>ISWD – improved following PR; change not significant at 6 and 12-month follow up compared to baseline.</li> </ul>                                                                                                                                                                         |  |
|                                          |                                                                                                                                                        |                                                                                                                                            |                                                                      |                                                                                                                                                                                                                                                                                                                                                                                                                                                                                                                                      |            | HR-QoL:                                                                                                                                                                               |                                                                                                                                                                                                                                                                                  |                                                                                       |
|                                          |                                                                                                                                                        |                                                                                                                                            |                                                                      |                                                                                                                                                                                                                                                                                                                                                                                                                                                                                                                                      |            | <ul style="list-style-type: none"> <li>CRQ – total scores improved following PR; change not significant</li> </ul>                                                                    |                                                                                                                                                                                                                                                                                                                                                                       |                                                                                       |

|                                           |                                                                                                       |                                                                        |                                                                                         |                                                                                                                                                                                                                                                                                                                                                                                                                                                                                                                                                                                                                                                                      |                                                                                                          |                                                                                                                                                                                                                                                                      |                                                                                       |
|-------------------------------------------|-------------------------------------------------------------------------------------------------------|------------------------------------------------------------------------|-----------------------------------------------------------------------------------------|----------------------------------------------------------------------------------------------------------------------------------------------------------------------------------------------------------------------------------------------------------------------------------------------------------------------------------------------------------------------------------------------------------------------------------------------------------------------------------------------------------------------------------------------------------------------------------------------------------------------------------------------------------------------|----------------------------------------------------------------------------------------------------------|----------------------------------------------------------------------------------------------------------------------------------------------------------------------------------------------------------------------------------------------------------------------|---------------------------------------------------------------------------------------|
|                                           | experiences using qualitative assessment.<br><br>Study period: <i>unclear</i>                         |                                                                        |                                                                                         | <ul style="list-style-type: none"> <li>Unsupervised home exercise program</li> <li>Educational sessions</li> </ul> Materials used: <ul style="list-style-type: none"> <li>PowerPoint presentation</li> <li>Handouts</li> </ul>                                                                                                                                                                                                                                                                                                                                                                                                                                       |                                                                                                          | <p>at 6 and 12-month follow up compared to baseline.</p> Psychological wellbeing: <ul style="list-style-type: none"> <li>HADS – change not significant compared to baseline.</li> </ul>                                                                              |    |
| Shen <i>et al</i> (2021) (67)<br>China    | Investigate the impact of breathing exercise on HR-QoL and lung function.<br><br>Jan 2015 – May 2017  | RCT<br><br>Breathing exercise (IG)<br>vs<br>No breathing exercise (CG) | IPF<br><br>82<br>CG=43<br>IG=39<br><br>Mean age (SD):<br>CG=65.0 (8.0)<br>IG=65.3 (6.1) | Breathing exercise training <ul style="list-style-type: none"> <li>Duration: 12 months</li> <li>Frequency: twice/week for 2 weeks before trial started (supervised exercise); 3 times/day (unsupervised exercise); monthly (self- video recording of exercise)</li> <li>Number of sessions: 4 (supervised exercise)</li> </ul> Components: <ul style="list-style-type: none"> <li>Supervised breathing exercise training</li> <li>Unsupervised breathing exercise training</li> <li>Self- video recording of exercise provided to HCP to ensure correct techniques</li> </ul> Materials used: <ul style="list-style-type: none"> <li>Adverse events diary</li> </ul> | Outpatient / home <ul style="list-style-type: none"> <li>In person/remote</li> <li>Individual</li> </ul> | HR-QoL: <ul style="list-style-type: none"> <li>SGRQ – improved in IG while CG worsened with significant differences in change comparing both groups at both 6 and 12 months.</li> </ul>                                                                              |    |
|                                           |                                                                                                       |                                                                        |                                                                                         |                                                                                                                                                                                                                                                                                                                                                                                                                                                                                                                                                                                                                                                                      |                                                                                                          | Exercise/functional capacity: <ul style="list-style-type: none"> <li>6MWD – decreased in both groups at both 6 and 12 months but the decline was not significant in IG over time while CG had a significantly larger decline compared to IG at 12 months.</li> </ul> |    |
| Shimoda <i>et al</i> (2021) (68)<br>Japan | Test whether a PR program improves ADLs in people with remaining symptoms and not yet recovered their | Pre-post study (prospective)                                           | Interstitial pneumonia, COPD, asthma, nontuberculous mycobacterial pulmonary infection, | PR program <ul style="list-style-type: none"> <li>Duration: median 9 days (ranged 6-12)</li> <li>Frequency: 5 days/week</li> </ul>                                                                                                                                                                                                                                                                                                                                                                                                                                                                                                                                   | Inpatient <ul style="list-style-type: none"> <li>In person</li> <li>Individual</li> </ul>                | Exercise/functional capacity: <ul style="list-style-type: none"> <li>ISWD – improved following PR.</li> <li>Barthel index – improved following PR.</li> <li>Nagasaki University Respiratory ADL questionnaire – improved following</li> </ul>                        |  |

|                                             |                                                                                                                                        |                                                                                                                                    |                                                                                                                                                                       |                                                                                                                                                                                                                                                                                                                                                                                                                                                                                                                                                                                                                                                                                                                                               |                                                                                               |                                                                                                                                                                                                                                                                                                                                                               |                                                                                                                                                                            |
|---------------------------------------------|----------------------------------------------------------------------------------------------------------------------------------------|------------------------------------------------------------------------------------------------------------------------------------|-----------------------------------------------------------------------------------------------------------------------------------------------------------------------|-----------------------------------------------------------------------------------------------------------------------------------------------------------------------------------------------------------------------------------------------------------------------------------------------------------------------------------------------------------------------------------------------------------------------------------------------------------------------------------------------------------------------------------------------------------------------------------------------------------------------------------------------------------------------------------------------------------------------------------------------|-----------------------------------------------------------------------------------------------|---------------------------------------------------------------------------------------------------------------------------------------------------------------------------------------------------------------------------------------------------------------------------------------------------------------------------------------------------------------|----------------------------------------------------------------------------------------------------------------------------------------------------------------------------|
|                                             | ability to perform ADLs.<br><br>Oct 2018 – Oct 2019                                                                                    |                                                                                                                                    | old healed pulmonary tuberculosis, comorbidity without respiratory diseases<br><br>24<br>Interstitial pneumonia=8<br><br>Median age (range):<br>IP=79.0 (76.5 – 84.8) | Components: <ul style="list-style-type: none"> <li>Supervise exercise training</li> <li>Patient education</li> </ul>                                                                                                                                                                                                                                                                                                                                                                                                                                                                                                                                                                                                                          |                                                                                               | PR. <ul style="list-style-type: none"> <li>Short Physical Performance Battery – improved following PR.</li> </ul> Symptoms: <ul style="list-style-type: none"> <li>MMRC – improved following PR.</li> <li>CAT – change not significant.</li> </ul> Psychological wellbeing: <ul style="list-style-type: none"> <li>CES-D – change not significant.</li> </ul> | <br> |
| Stanziola <i>et al</i> (2022) (69)<br>Italy | Evaluate the impact of a Telemedicine Service on the management of IPF including hospitalisation and death.<br><br>11 Mar – 4 May 2020 | Post intervention evaluation<br><br>2020 cohort (when service was available)<br>vs<br>2019 cohort (when service was not available) | IPF<br><br>371<br>2020 cohort=189<br>2019 cohort=182<br><br>Mean age (SD):<br>2020 cohort=71.8 (7.4)<br>2019 cohort=70 (8.1)                                          | Telemedicine service during COVID-19 outbreak <ul style="list-style-type: none"> <li>Frequency: <math>\geq 3</math> times/week (monitoring of clinical parameters)</li> </ul> <i>Duration of service use and number of contacts depend on the participant</i><br><br>Components: <ul style="list-style-type: none"> <li>Access to email, telephone and videoconference services</li> <li>General measures to prevent COVID-19 diffusion (i.e.. handwashing, use of face masks in public, social distancing, isolation)</li> <li>Self-monitoring of clinical parameters (e.g. blood pressure, oxygen saturation)</li> </ul> Materials used: <ul style="list-style-type: none"> <li>Mobile applications for chat and videoconference</li> </ul> | Community / home <ul style="list-style-type: none"> <li>Remote</li> <li>Individual</li> </ul> | Healthcare utilisation: <ul style="list-style-type: none"> <li>Participants in the 2020 cohort were significantly less likely to experience hospitalisation compared to the 2019 cohort.</li> </ul>                                                                                                                                                           |                                                                                         |

|                                                                                         |                                                                                                                                           |                                                      |                                                                                                         |                                                                                                                                                                                                                                                                                                                                                                                     |                                                                                             |                                                                                                                                                                                                                                                                                                                                                                           |
|-----------------------------------------------------------------------------------------|-------------------------------------------------------------------------------------------------------------------------------------------|------------------------------------------------------|---------------------------------------------------------------------------------------------------------|-------------------------------------------------------------------------------------------------------------------------------------------------------------------------------------------------------------------------------------------------------------------------------------------------------------------------------------------------------------------------------------|---------------------------------------------------------------------------------------------|---------------------------------------------------------------------------------------------------------------------------------------------------------------------------------------------------------------------------------------------------------------------------------------------------------------------------------------------------------------------------|
| Swigris <i>et al</i> (2011) (70)<br>USA                                                 | Test whether a PR program improves functional capacity, fatigue, sleep, anxiety, depression and HR-QoL.<br><br>2008-2009                  | Pre-post study (prospective)<br><br>IPF vs COPD      | IPF, COPD (as comparison group)<br><br>77<br>IPF=21<br>COPD=56<br><br>Mean age (SD):<br>IPF: 71.5 (7.4) | Similar PR programs across 6 sites<br><ul style="list-style-type: none"> <li>Duration: 6-8 weeks</li> <li>Frequency: 2-3 times/week</li> <li>Number of sessions: 18</li> </ul> Components:<br><ul style="list-style-type: none"> <li>Supervised exercise training</li> <li>Breathing techniques</li> <li>Patient education</li> </ul>                                               | Outpatient<br><ul style="list-style-type: none"> <li>In person</li> <li>Group</li> </ul>    | Exercise/functional capacity:<br><ul style="list-style-type: none"> <li>6MWD – improved following PR.</li> </ul>                                                                                                                                                                        |
|                                                                                         |                                                                                                                                           |                                                      |                                                                                                         |                                                                                                                                                                                                                                                                                                                                                                                     |                                                                                             | Symptoms:<br><ul style="list-style-type: none"> <li>FSS – improved following PR.</li> <li>Pittsburgh Sleep Quality Index – change not significant.</li> </ul>                                                                                                                          |
|                                                                                         |                                                                                                                                           |                                                      |                                                                                                         |                                                                                                                                                                                                                                                                                                                                                                                     |                                                                                             | Psychological wellbeing:<br><ul style="list-style-type: none"> <li>GAD-7 – change not significant in all domains of the anxiety scale.</li> <li>PHQ-8 (measuring depression) – change not significant in all domains.</li> </ul>                                                       |
|                                                                                         |                                                                                                                                           |                                                      |                                                                                                         |                                                                                                                                                                                                                                                                                                                                                                                     |                                                                                             | HR-QoL:<br><ul style="list-style-type: none"> <li>SF-36 – change not significant in all domains.</li> </ul>                                                                                                                                                                            |
| Talwar <i>et al</i> (2014) (71)<br>USA                                                  | Examine the effects of a PR program on fatigue measured by the Fatigue Severity Scale.<br><br>Study period:<br><i>unclear</i>             | Pre-post study (retrospective audit)                 | Advanced ILD/IPF, COPD<br><br>21<br>ILD/IPF=5<br><br>Mean age (SD):<br>Whole cohort=64.5 (10.9)         | PR program<br><ul style="list-style-type: none"> <li>Duration: 6-8 weeks</li> <li>Frequency: 3 times/week (exercise training); twice/week (patient education)</li> <li>Number of sessions: 18-24 (exercise training); 12-16 (patient education)</li> </ul> Components:<br><ul style="list-style-type: none"> <li>Supervised exercise training</li> <li>Patient education</li> </ul> | Outpatient<br><ul style="list-style-type: none"> <li>In person</li> <li>Group</li> </ul>    | Symptoms:<br><ul style="list-style-type: none"> <li>FSS – improved following PR.</li> </ul>                                                                                                                                                                                            |
|                                                                                         |                                                                                                                                           |                                                      |                                                                                                         |                                                                                                                                                                                                                                                                                                                                                                                     |                                                                                             | Psychological wellbeing<br><ul style="list-style-type: none"> <li>GDS – change not significant.</li> </ul>                                                                                                                                                                             |
| Thombs <i>et al</i> (2021) (72)<br>Canada, Australia, France, Mexico, Spain, UK and USA | Assess the effects of the Scleroderma Patient-centred Intervention Network COVID-19 Home-isolation Activities Together program on anxiety | RCT<br><br>SPIN-CHAT (IG) vs Waitlist SPIN-CHAT (CG) | Systemic sclerosis<br><br>172<br>CG=86<br>IG=86<br><br>Mean age (SD):                                   | Scleroderma Patient-centred Intervention Network COVID-19 Home-isolation Activities Together (SPIN-CHAT) program in 7 countries – a multi-faceted education and support program for mental health during COVID-19 outbreak including videoconferences                                                                                                                               | Community / home<br><ul style="list-style-type: none"> <li>Remote</li> <li>Group</li> </ul> | Psychological wellbeing:<br><ul style="list-style-type: none"> <li>PROMIS – change not significant in anxiety immediately post intervention but improved at 6 weeks.</li> <li>PHQ – change not significant in depression immediately post intervention but improved at 6</li> </ul>  |



|                                           |                                                                                                                                                                                                                                |                                 |                                                                                                       |                                                                                                                                                                                                                                                                                                                                                                                                                                                                                  |                                                                                                                          |                                                                                                                                                                                                                                                                                                                                                                                                                                                                                            |                                                                                       |
|-------------------------------------------|--------------------------------------------------------------------------------------------------------------------------------------------------------------------------------------------------------------------------------|---------------------------------|-------------------------------------------------------------------------------------------------------|----------------------------------------------------------------------------------------------------------------------------------------------------------------------------------------------------------------------------------------------------------------------------------------------------------------------------------------------------------------------------------------------------------------------------------------------------------------------------------|--------------------------------------------------------------------------------------------------------------------------|--------------------------------------------------------------------------------------------------------------------------------------------------------------------------------------------------------------------------------------------------------------------------------------------------------------------------------------------------------------------------------------------------------------------------------------------------------------------------------------------|---------------------------------------------------------------------------------------|
|                                           | and other mental health outcomes on people with at least mild anxiety symptoms.<br><br>9 Apr 2020 – 27 Apr 2020                                                                                                                |                                 | CG=54.0 (10.9)<br>IG=56.0 (11.9)                                                                      | <ul style="list-style-type: none"> <li>Duration: 4 weeks</li> <li>Frequency: 3 sessions/week</li> <li>Number of sessions: 12</li> </ul> <p>Components:</p> <ul style="list-style-type: none"> <li>Patient education</li> <li>Home exercises</li> <li>Peer support</li> </ul> <p>Materials used:</p> <ul style="list-style-type: none"> <li>Resource materials to support topics covered</li> </ul>                                                                               |                                                                                                                          | <p>weeks.</p> <ul style="list-style-type: none"> <li>COVID-19 Fears questionnaire – change not significant over the 6-week period.</li> <li>Multidimensional State Boredom scale – change not significant over the 6-week period.</li> <li>UCLA Loneliness Scale – change not significant over the 6-week period.</li> </ul> <p>Physical activity:</p> <ul style="list-style-type: none"> <li>IPAQ – change not significant in physical activity levels over the 6-week period.</li> </ul> |    |
| Tonelli <i>et al</i> (2017) (73)<br>Italy | Confirm the benefits of PR program delivered in both in- and outpatient setting; and investigate the influences of baseline exercise capacity, disease severity and aetiology on clinical outcomes.<br><br>Jan 2013 - Jan 2015 | Pre-post study (prospective)    | Various ILD (63% IPF)<br><br>41<br>Inpatient=30<br>Outpatient=11<br><br>Mean age (SD):<br>66.9 (10.9) | <p>Similar PR program across 2 sites</p> <ul style="list-style-type: none"> <li>Frequency: 6 days/week – daily in the first week then twice/day thereafter (exercise training); 3 sessions/week (educational sessions)</li> <li>Number of sessions: ≥24 (exercise training)</li> </ul> <p>Components:</p> <ul style="list-style-type: none"> <li>Supervised exercise training</li> <li>Breathing training</li> <li>Educational sessions</li> <li>Psychosocial support</li> </ul> | Outpatient (27%) / inpatient (73%) <ul style="list-style-type: none"> <li>In person</li> <li>Individual/group</li> </ul> | <p>Exercise/functional capacity:</p> <ul style="list-style-type: none"> <li>6MWD – improved following PR.</li> <li>Endurance test – cycle endurance time and power improved following PR.</li> </ul>                                                                                                                                                                                                                                                                                       |    |
|                                           |                                                                                                                                                                                                                                |                                 |                                                                                                       |                                                                                                                                                                                                                                                                                                                                                                                                                                                                                  |                                                                                                                          | <p>Symptoms:</p> <ul style="list-style-type: none"> <li>MMRC – improved following PR.</li> </ul>                                                                                                                                                                                                                                                                                                                                                                                           |  |
|                                           |                                                                                                                                                                                                                                |                                 |                                                                                                       |                                                                                                                                                                                                                                                                                                                                                                                                                                                                                  |                                                                                                                          | <p>HR-QoL:</p> <ul style="list-style-type: none"> <li>SGRQ – all domains improved following PR.</li> </ul>                                                                                                                                                                                                                                                                                                                                                                                 |  |
| Trivedi (2017) (74)                       | Investigate the effects of a PR                                                                                                                                                                                                | Non-randomised controlled study | Silicosis                                                                                             | Disease specific education program with/without PR exercise training                                                                                                                                                                                                                                                                                                                                                                                                             | Outpatient                                                                                                               | <p>Symptoms:</p> <ul style="list-style-type: none"> <li>MRC – improved in both groups but</li> </ul>                                                                                                                                                                                                                                                                                                                                                                                       |  |

|                                                             |                                                                                                                                               |                                                                    |                                                                                                                                                                                                    |                                                                                                                                                                                                                                                                                                                                                                                                                                                                                                                                                                                                                                  |                                                                                                                   |                                                                                                                                                                                                                                                                                                                                                                                                                                                                                                                                                                                                                                                                                                                                         |                                                                                                                                                                                                                                                                                                                                                               |
|-------------------------------------------------------------|-----------------------------------------------------------------------------------------------------------------------------------------------|--------------------------------------------------------------------|----------------------------------------------------------------------------------------------------------------------------------------------------------------------------------------------------|----------------------------------------------------------------------------------------------------------------------------------------------------------------------------------------------------------------------------------------------------------------------------------------------------------------------------------------------------------------------------------------------------------------------------------------------------------------------------------------------------------------------------------------------------------------------------------------------------------------------------------|-------------------------------------------------------------------------------------------------------------------|-----------------------------------------------------------------------------------------------------------------------------------------------------------------------------------------------------------------------------------------------------------------------------------------------------------------------------------------------------------------------------------------------------------------------------------------------------------------------------------------------------------------------------------------------------------------------------------------------------------------------------------------------------------------------------------------------------------------------------------------|---------------------------------------------------------------------------------------------------------------------------------------------------------------------------------------------------------------------------------------------------------------------------------------------------------------------------------------------------------------|
| India                                                       | <p>program on dyspnoea and lung capacities.</p> <p>Study period:<br/><i>unclear</i></p>                                                       | <p>PR with education program<br/>vs<br/>Education program only</p> | <p>48<br/>PR with education program=24<br/>Education program only=24</p> <p>Mean age:<br/>52</p>                                                                                                   | <ul style="list-style-type: none"> <li>• Duration: 4 weeks</li> <li>• Frequency: 4 days/week (exercise training); weekly (education program)</li> <li>• Number of sessions: 16 (exercise training); 4 (education program)</li> </ul> <p>Components:</p> <ul style="list-style-type: none"> <li>• Supervised exercise training</li> <li>• Education program</li> </ul> <p>Materials used:</p> <ul style="list-style-type: none"> <li>• Audio-visual tape</li> <li>• Pamphlets</li> </ul>                                                                                                                                          | <ul style="list-style-type: none"> <li>• In person</li> <li>• Group</li> </ul>                                    | <p>higher significance level in group receiving both PR exercise training and education program.</p>                                                                                                                                                                                                                                                                                                                                                                                                                                                                                                                                                                                                                                    |                                                                                                                                                                                                                                                                                                                                                               |
| <p>Tsang <i>et al</i> (2018) (75)<br/>Hong Kong (China)</p> | <p>Evaluate the clinical benefits of a community-based rehabilitation program and a home-based rehabilitation program.</p> <p>2008 - 2011</p> | <p>Pre-post study (retrospective audit)</p>                        | <p>Pneumoconiosis</p> <p>181<br/>Community based rehabilitation program (CBRP)=155<br/>Home based rehabilitation program (HBRP)=26</p> <p>Mean age (SD):<br/>CBRP=70.7 (8)<br/>HBRP=74.5 (8.3)</p> | <p>Community or home-based rehabilitation program</p> <ul style="list-style-type: none"> <li>• Duration: 4-6 weeks (CBRP)</li> <li>• Frequency: twice/week (CBRP); 8 home visits (HBRP)</li> <li>• Number of sessions/visits: 8-12 group sessions (CBRP); 8 home visits (HBRP)</li> </ul> <p>Components:</p> <p>CBRP</p> <ul style="list-style-type: none"> <li>• Breathing retraining</li> <li>• Home exercise conditioning</li> <li>• Patient education</li> <li>• Walking aids and exercise apparatus prescription</li> <li>•</li> </ul> <p>HBRP</p> <ul style="list-style-type: none"> <li>• Breathing retraining</li> </ul> | <p>Community / home</p> <ul style="list-style-type: none"> <li>• In person</li> <li>• Group/individual</li> </ul> | <p>Exercise/functional capacity:</p> <ul style="list-style-type: none"> <li>• 6MWD – improved in both CBRP and HBRP.</li> </ul> <p>HR-QoL:</p> <ul style="list-style-type: none"> <li>• CRQ – emotion and mastery improved in CBRP; change in all domains not significant in HBRP.</li> <li>• SF-12 – physical component improved in CBRP; change in both physical and mental components not significant in HBRP.</li> </ul> <p>Psychological wellbeing:</p> <ul style="list-style-type: none"> <li>• HADS – anxiety and depression improved in CBRP; change not significant in HBRP.</li> </ul> <p>Disease knowledge:</p> <ul style="list-style-type: none"> <li>• Disease knowledge test – improved in both CBRP and HBRP.</li> </ul> | <br><br><br> |



|                                             |                                                                                                                                                                                                |                                      |                                                                                                   |                                                                                                                                                                                                                                                                                                                                                                                                                                                                                                                                                                                                                                                                                                                       |                                                                                                 |                                                                                                                                                                                                                       |                                                                                     |
|---------------------------------------------|------------------------------------------------------------------------------------------------------------------------------------------------------------------------------------------------|--------------------------------------|---------------------------------------------------------------------------------------------------|-----------------------------------------------------------------------------------------------------------------------------------------------------------------------------------------------------------------------------------------------------------------------------------------------------------------------------------------------------------------------------------------------------------------------------------------------------------------------------------------------------------------------------------------------------------------------------------------------------------------------------------------------------------------------------------------------------------------------|-------------------------------------------------------------------------------------------------|-----------------------------------------------------------------------------------------------------------------------------------------------------------------------------------------------------------------------|-------------------------------------------------------------------------------------|
|                                             | Jan 2012 - July 2014<br><br><i>Vainshelboim et al (2016)</i> : Investigate the effects of a PR program on physical activity and body composition over 11 months.<br>Jan 4, 2012 - Nov 30, 2013 |                                      |                                                                                                   |                                                                                                                                                                                                                                                                                                                                                                                                                                                                                                                                                                                                                                                                                                                       |                                                                                                 | not sustain at 11-month.                                                                                                                                                                                              |                                                                                     |
| Wallaert <i>et al</i> (2019) (79)<br>France | Investigate the long term effects of a home-based PR program.<br><br>Dec 2011 - Dec 2017                                                                                                       | Pre-post study (retrospective audit) | Fibrotic idiopathic interstitial pneumonia (54% IPF)<br><br>112<br><br>Mean age (SD): 66.8 (10.2) | PR program <ul style="list-style-type: none"> <li>• Duration: 2 months</li> <li>• Frequency: weekly</li> <li>• Number of sessions: 8</li> </ul><br>Components: <ul style="list-style-type: none"> <li>• Supervised in-home exercise training</li> <li>• Unsupervised home exercise program</li> <li>• Training in resumption of daily life physical activity</li> <li>• Therapeutic patient education</li> <li>• Psychosocial support</li> <li>• Motivational communication to facilitate behavioural change and self-management</li> </ul><br>Materials used: <ul style="list-style-type: none"> <li>• Exercise diary</li> <li>• Interactive presentations, Q&amp;A, card games and an illustrated folder</li> </ul> | Home <ul style="list-style-type: none"> <li>• In person/remote</li> <li>• Individual</li> </ul> | Exercise/functional capacity: <ul style="list-style-type: none"> <li>• 6MST – improved in IG following PR; improvement sustained at 6 and 12-month.</li> </ul>                                                        |  |
|                                             |                                                                                                                                                                                                |                                      |                                                                                                   |                                                                                                                                                                                                                                                                                                                                                                                                                                                                                                                                                                                                                                                                                                                       |                                                                                                 | HR-QoL: <ul style="list-style-type: none"> <li>• VSRQ – improved in IG following PR; improvement sustained at 12-month.</li> </ul>                                                                                    |  |
|                                             |                                                                                                                                                                                                |                                      |                                                                                                   |                                                                                                                                                                                                                                                                                                                                                                                                                                                                                                                                                                                                                                                                                                                       |                                                                                                 | Psychological wellbeing: <ul style="list-style-type: none"> <li>• HADS – anxiety improved in IG following PR; improvement sustained at 12-month. Difference between groups not significant for depression.</li> </ul> |  |

|                                             |                                                                                                         |                                        |                                                                                                            |                                                                                                                                                                                                                                                                                                                                                                                                                                                                                           |                                                                                                      |                                                                                                                                                                                                                                                                                                                                                                                                                                      |
|---------------------------------------------|---------------------------------------------------------------------------------------------------------|----------------------------------------|------------------------------------------------------------------------------------------------------------|-------------------------------------------------------------------------------------------------------------------------------------------------------------------------------------------------------------------------------------------------------------------------------------------------------------------------------------------------------------------------------------------------------------------------------------------------------------------------------------------|------------------------------------------------------------------------------------------------------|--------------------------------------------------------------------------------------------------------------------------------------------------------------------------------------------------------------------------------------------------------------------------------------------------------------------------------------------------------------------------------------------------------------------------------------|
| Wallaert <i>et al</i> (2020) (80)<br>France | Assess the long term impact of a PR program on daily life physical activity.<br><br>Jul 2012 - Apr 2016 | RCT<br><br>PR (IG)<br>vs<br>No PR (CG) | Sarcoidosis<br><br>38<br>CG=18<br>IG=20<br><br>Median age (range):<br>CG=57.5 (49-65)<br>IG=57.5 (48-63.5) | PR program <ul style="list-style-type: none"> <li>• Duration: 2 months</li> <li>• Frequency: 3 times/week</li> <li>• Number of sessions: 24</li> </ul> Components: <ul style="list-style-type: none"> <li>• Supervised exercise training</li> <li>• Training in resumption of daily life physical activity</li> <li>• Therapeutic patient education</li> <li>• Psychosocial support</li> <li>• Motivational communication to facilitate behavioural change and self-management</li> </ul> | Outpatient <ul style="list-style-type: none"> <li>• In person</li> <li>• Individual/group</li> </ul> | Physical activity: <ul style="list-style-type: none"> <li>• 12-month change in time spent in activities above an estimated energy expenditure of 2.5 METs – change not significant.</li> <li>• Steps/day, total daily energy expenditure/day, total energy expenditure above 2.5 METs/day – change not significant at 6 and 12-month.</li> </ul>  |
|                                             |                                                                                                         |                                        |                                                                                                            |                                                                                                                                                                                                                                                                                                                                                                                                                                                                                           |                                                                                                      | Exercise/functional capacity: <ul style="list-style-type: none"> <li>• 6MST – improved in IG at following PR, improvement sustained at 12-month.</li> </ul>                                                                                                                                                                                       |
|                                             |                                                                                                         |                                        |                                                                                                            |                                                                                                                                                                                                                                                                                                                                                                                                                                                                                           |                                                                                                      | Symptoms: <ul style="list-style-type: none"> <li>• MMRC – improved in IG following PR; improvement sustained at 6-month but difference between groups not significant at 12-month.</li> <li>• FAS – no immediate improvement following PR but improved in IG at 12-month.</li> </ul>                                                              |
|                                             |                                                                                                         |                                        |                                                                                                            |                                                                                                                                                                                                                                                                                                                                                                                                                                                                                           |                                                                                                      | HR-QoL: <ul style="list-style-type: none"> <li>• VSRQ – improved in IG following PR; difference between groups not significant at 6 and 12-month.</li> </ul>                                                                                                                                                                                      |
|                                             |                                                                                                         |                                        |                                                                                                            |                                                                                                                                                                                                                                                                                                                                                                                                                                                                                           |                                                                                                      | Psychological wellbeing: <ul style="list-style-type: none"> <li>• HADS – difference between groups not significant in anxiety and depression over the 12-month observation period.</li> </ul>                                                                                                                                                   |
| Zaki <i>et al</i> (2021) (81)<br>India      | Examine the benefits of IMT added to a PR program on                                                    | RCT<br><br>PR with IMT (IG)            | ILD (IPF: CG=32%;<br>IG=30%)                                                                               | PR program with/without IMT <ul style="list-style-type: none"> <li>• Duration: 8 weeks</li> <li>• Frequency: 3 times/week</li> </ul>                                                                                                                                                                                                                                                                                                                                                      | Outpatient <ul style="list-style-type: none"> <li>• In person</li> </ul>                             | Exercise/functional capacity: <ul style="list-style-type: none"> <li>• 6MWD – improved in both groups with significantly larger improvement in IG.</li> </ul>                                                                                                                                                                                   |

|                                         |                                                                                                                                             |                                                                                                                      |                                                                                                            |                                                                                                                                                                                                                                                                                                                                                                                                                      |                                                                                                                                       |                                                                                                                                                                                                                                                                                                                                                                                                                                                                                                                                           |                                                                                      |
|-----------------------------------------|---------------------------------------------------------------------------------------------------------------------------------------------|----------------------------------------------------------------------------------------------------------------------|------------------------------------------------------------------------------------------------------------|----------------------------------------------------------------------------------------------------------------------------------------------------------------------------------------------------------------------------------------------------------------------------------------------------------------------------------------------------------------------------------------------------------------------|---------------------------------------------------------------------------------------------------------------------------------------|-------------------------------------------------------------------------------------------------------------------------------------------------------------------------------------------------------------------------------------------------------------------------------------------------------------------------------------------------------------------------------------------------------------------------------------------------------------------------------------------------------------------------------------------|--------------------------------------------------------------------------------------|
|                                         | inspiratory muscle strength, functional capacity, HR-QoL, dyspnoea and pulmonary function.<br><br>5 May 2019 – 28 Sep 2019                  | vs<br>PR alone (CG)                                                                                                  | 51<br>CG=25<br>IG=26<br><br>Mean age (SD):<br>CG=53.1 (13.3)<br>IG=53.4 (13.6)                             | <ul style="list-style-type: none"> <li>Number of sessions: 24</li> </ul> Components: <ul style="list-style-type: none"> <li>Supervised exercise training</li> <li>Dyspnoea coping strategies</li> <li>Nutritional guidance</li> <li>Psychological counselling</li> </ul>                                                                                                                                             | <i>Unclear whether it was delivered in group or individual setting</i>                                                                | HR-QoL: <ul style="list-style-type: none"> <li>SGRQ – improved in all domains in both groups with significantly larger improvement in activity domain and total scores in IG.</li> </ul> Symptoms: <ul style="list-style-type: none"> <li>MMRC – improved in both groups with significantly larger improvement in IG.</li> </ul>                                                                                                                                                                                                          |    |
| Zhang <i>et al</i> (2022) (82)<br>China | Investigate the effects of a PR program combined with conventional drugs on BODE and pulmonary function indexes.<br><br>Apr 2020 – Apr 2021 | Pre-post study (retrospective audit)<br><br>PR with conventional drugs (IG)<br>vs<br>Conventional drugs alone (CG)   | Interstitial pneumonia<br><br>89<br>CG=41<br>IG=48<br><br>Mean age (SD):<br>CG=65.6 (3.1)<br>IG=66.0 (3.0) | PR combined with conventional drug treatment <ul style="list-style-type: none"> <li>Duration: 3 months</li> <li>Frequency: 3-4 times/day; twice/day</li> </ul> Components: <ul style="list-style-type: none"> <li>Supervised exercise training</li> <li>Breathing training</li> <li>Patient education</li> <li>Psychological intervention</li> <li>Relaxation training</li> </ul>                                    | Outpatient<br><br><i>Unclear whether it was delivered in person or remotely; and whether it was in an individual or group setting</i> | Exercise/functional capacity: <ul style="list-style-type: none"> <li>BODE (exercise ability) –improved in both groups with significantly larger improvement in IG.</li> </ul> Symptoms: <ul style="list-style-type: none"> <li>BODE (airflow obstruction and dyspnoea) –improved in both groups with significantly larger improvement in IG.</li> </ul>                                                                                                                                                                                   |   |
| Zhou <i>et al</i> (2021) (83)<br>China  | Compare the effectiveness and safety of a pulmonary Daoyin rehabilitation program with usual care.<br><br>Apr 2017 – Aug 2018               | RCT<br><br>Pulmonary Daoyin (PD) rehabilitation program<br>vs<br>Exercise training (ET)<br>vs<br>Usual activity (CG) | IPF<br><br>96<br>CG=33<br>ET=31<br>PD=32<br><br>Mean age (SD):<br>CG=67 (10)<br>ET=64 (9)<br>PD=66 (11)    | Pulmonary Daoyin rehabilitation program – a traditional Chinese medicine rehabilitation program <ul style="list-style-type: none"> <li>Duration: 2 months</li> <li>Frequency: 5 days/week</li> </ul> Components: <ul style="list-style-type: none"> <li>Intensive supervised exercise</li> <li>Unsupervised home exercise</li> <li>Mediative technique and mind regulation</li> <li>Posture and movements</li> </ul> | Outpatient / home <ul style="list-style-type: none"> <li>In person/remote</li> <li>Group/individual</li> </ul>                        | Exercise/functional capacity: <ul style="list-style-type: none"> <li>6MWD – the PD group had significantly larger improvement than both ET group and CG at 2 and 6 months from baseline.</li> </ul> HR-QoL: <ul style="list-style-type: none"> <li>SGRQ – the PD group had significantly larger improvement in the activity, impact domain and total score compared to CG 2 months following baseline; improvement in the impact domain and total score remained significant at 6 months; differences in change in all domains</li> </ul> |  |

|  |  |  |  |                                                                                                                                                                                           |  |                                                                                                                                                                                        |                                                                                     |
|--|--|--|--|-------------------------------------------------------------------------------------------------------------------------------------------------------------------------------------------|--|----------------------------------------------------------------------------------------------------------------------------------------------------------------------------------------|-------------------------------------------------------------------------------------|
|  |  |  |  | <ul style="list-style-type: none"> <li>Breathing exercises</li> </ul>                                                                                                                     |  | not significant when compared to ET group.                                                                                                                                             |                                                                                     |
|  |  |  |  | <p>Materials used:</p> <ul style="list-style-type: none"> <li>Written instructions</li> <li>CD to facilitate self-practice</li> <li>Diary to record frequency of home sessions</li> </ul> |  | <p>Symptoms:</p> <ul style="list-style-type: none"> <li>MMRC – the PD group had significantly larger improvement than both ET group and CG at 2 and 6 months from baseline.</li> </ul> |  |

 – Change not significant compared to baseline or no significant difference between groups.

 – Mixed results.

 – Significant improvement from baseline, or better when compared to other group/s.

 – Significant worsening compared to baseline, or worse when compared to other group/s

N/A – Descriptive data with no comparison made.

ILD: interstitial lung disease; PR: pulmonary rehabilitation; EOL; end-of-life; OT: oxygen therapy; RCT: randomised controlled trial; IPF; idiopathic pulmonary fibrosis; COPD: chronic obstructive pulmonary disease; HR-QoL: health related – quality of life; IG: intervention group; CG: control group; HCP: healthcare professional; VAS: visual analogue scale; IIP: idiopathic interstitial pneumonia; ADL: activity of daily living; IMT: inspiratory muscle training.

## References

1. Al Moamary MS. Impact of a pulmonary rehabilitation programme on respiratory parameters and health care utilization in patients with chronic lung diseases other than COPD. *East Mediterr Health J.* 2012; 18: 120-126.
2. Archibald N, Bakal JA, Richman-Eisenstat J, et al. Early integrated palliative care bundle impacts location of death in interstitial lung disease: a pilot retrospective study. *Am J Hosp Palliat Care.* 2021; 38: 104-113.
3. Arizono S, Taniguchi H, Sakamoto K, et al. Pulmonary rehabilitation in patients with idiopathic pulmonary fibrosis: comparison with chronic obstructive pulmonary disease. *Sarcoidosis Vasc Diffuse Lung Dis.* 2017; 34: 283-289.
4. Bajwah S, Ross JR, Wells AU, et al. Palliative care for patients with advanced fibrotic lung disease: a randomised controlled phase II and feasibility trial of a community case conference. *Thorax.* 2015; 70: 830-839.
5. Bassi I, Guerrieri A, Carpano M, et al. Feasibility and efficacy of a multidisciplinary palliative approach in patients with advanced interstitial lung disease. A pilot randomised controlled trial. *Pulmonology.* 2021; <https://doi.org/10.1016/j.pulmoe.2021.11.004>.
6. Bischoff KE, Choi S, Su A, et al. Better together: a mixed-methods study of palliative care co-management for patients with interstitial lung disease. *J Palliat Med.* 2021; 24: 1823-1832.
7. Brunetti G, Malovini A, Maniscalco M, et al. Pulmonary rehabilitation in patients with interstitial lung diseases: correlates of success. *Respir Med.* 2021; 185: 106473.
8. Cerdán-de-las-Heras J, Balbino F, Løkke A, et al. Tele-rehabilitation program in idiopathic pulmonary fibrosis - a single-center randomized trial. *Int J Environ Res Public Health.* 2021; 18: 10016.
9. Chai GT, Neo HY, Abisheganaden J, et al. Impact of palliative care in end-of-life of fibrotic interstitial lung disease patients. *Am J Hosp Palliat Care.* 2022; 39: 1443-1451.
10. Chéhère B, Bougault V, Chenivresse C, et al. Cardiorespiratory adaptation during 6-minute walk test in fibrotic idiopathic interstitial pneumonia patients who did or did not respond to pulmonary rehabilitation. *Eur J Phys Rehabil Med.* 2019; 55: 103-112.



11. da Fontoura FF, Berton DC, Watte G, et al. Pulmonary rehabilitation in patients with advanced idiopathic pulmonary fibrosis referred for lung transplantation. *J Cardiopulm Rehabil Prev.* 2018; 38: 131-134.
12. Deniz S, Sahin H, Yalniz E. Does the severity of interstitial lung disease affect the gains from pulmonary rehabilitation? *Clinical Respir J.* 2018; 12: 2141-2150.
13. Devani P, Pinto N, Jain P, et al. Effect of pulmonary rehabilitation (PR) program in patients with interstitial lung disease (ILD) - Indian scenario. *J Assoc Physicians India.* 2019; 67: 28-33.
14. Dowman LM, McDonald CF, Hill CJ, et al. The evidence of benefits of exercise training in interstitial lung disease: a randomised controlled trial. *Thorax.* 2017; 72: 610-619.
15. Duck A, Pigram L, Errhalt P, et al. IPF Care: a support program for patients with idiopathic pulmonary fibrosis treated with pirfenidone in Europe. *Adv Ther.* 2015; 32: 87-107.
16. Edwards C, Costello E, Cassidy N, et al. Use of the patientMpower app with home-based spirometry to monitor the symptoms and impact of fibrotic lung conditions: longitudinal observational study. *JMIR Mhealth Uhealth.* 2020; 8: e16158.
17. Elganady A, El Hoshy M, Eshmawey H, et al. Value of pulmonary rehabilitation in interstitial lung diseases. *Egypt J Chest Dis Tuberc.* 2020; 69: 542-548.
18. Ferreira G, Feuerman M, Spiegler P. Results of an 8-week, outpatient pulmonary rehabilitation program on patients with and without chronic obstructive pulmonary disease. *J Cardiopulm Rehabil.* 2006; 26: 54-60.
19. Ferreira A, Garvey C, Connors GL, et al. Pulmonary rehabilitation in interstitial lung disease: benefits and predictors of response. *Chest.* 2009; 135:442-447.
20. Fuschillo S, De Felice A, Elia A, et al. Effect of pulmonary rehabilitation on functional exercise capacity and hypoxemia in patients with interstitial lung diseases: a retrospective study. *Sarcoidosis Vasc Diffuse Lung Dis.* 2018; 35:245-251.
21. Gaunaurd IA, Gomez-Marin OW, Ramos CF, et al. Physical activity and quality of life improvements of patients with idiopathic pulmonary fibrosis completing a pulmonary rehabilitation program. *Respir care.* 2014; 59: 1872-1879.

22. Grongstad A, Spruit MA, Oldervoll LM, et al. Pulmonary rehabilitation in patients with pulmonary sarcoidosis: impact on exercise capacity and fatigue. *Respiration*. 2020; 99: 289-297.
23. Guler SA, Hur SA, Stickland MK, et al. Survival after inpatient or outpatient pulmonary rehabilitation in patients with fibrotic interstitial lung disease: a multicentre retrospective cohort study. *Thorax*. 2022; 77: 589-595.
24. Holland AE, Hill CJ, Conron M, et al. Short term improvement in exercise capacity and symptoms following exercise training in interstitial lung disease. *Thorax*. 2008; 63: 549-554.
25. Holland AE, Hill CJ, Glaspole I, et al. Predictors of benefit following pulmonary rehabilitation for interstitial lung disease. *Respir Med*. 2012; 106: 429-435.
26. Huppmann P, Sczepanski B, Boensch M, et al. Effects of inpatient pulmonary rehabilitation in patients with interstitial lung disease. *Eur Respir J*. 2013; 42: 444-453.
27. Igai Y, Porter SE. Development and applicability of a dignity-centred palliative care programme for people with idiopathic pulmonary fibrosis: a qualitative-driven mixed methods study. *Nurs Open*. 2022; 10: 8-23.
28. Igarashi A, Iwanami Y, Sugino K, et al. Using 6-min walk distance expressed as a percentage of reference to evaluate the effect of pulmonary rehabilitation in elderly patients with interstitial lung disease. *J Cardiopulm Rehabil Prev*. 2018; 38: 342-347.
29. Jackson RM, Gómez-Marín OW, Ramos CF, et al. Exercise limitation in IPF patients: a randomized trial of pulmonary rehabilitation. *Lung*. 2014; 192: 367-376.
30. Janssen K, Rosielle D, Wang Q, et al. The impact of palliative care on quality of life, anxiety, and depression in idiopathic pulmonary fibrosis: a randomized controlled pilot study. *Respir Res*. 2020; 21: 2: <https://doi.org/10.1186/s12931-019-1266-9>.
31. Jarosch I, Schneeberger T, Gloeckl R, et al. Short-term effects of comprehensive pulmonary rehabilitation and its maintenance in patients with idiopathic pulmonary fibrosis: a randomized controlled trial. *J Clin Med*. 2020; 9: 1567.

32. Kalluri M, Claveria F, Ainsley E, et al. Beyond idiopathic pulmonary fibrosis diagnosis: multidisciplinary care with an early integrated palliative approach is associated with a decrease in acute care utilization and hospital deaths. *J Pain Symptom Manage*. 2018; 55: 420-426.
33. Kalluri M, Lu-Song J, Younus S, et al. Health care costs at the end of life for patients with idiopathic pulmonary fibrosis. Evaluation of a pilot multidisciplinary collaborative interstitial lung disease clinic. *Ann Am Thorac Soc*. 2020; 17: 706-713.
34. Kalluri M, Younus S, Archibald N, et al. Action plans in idiopathic pulmonary fibrosis: a qualitative study—'I do what I can do'. *BMJ Support Palliat Care*. 2021: <http://doi.org/10.1136/bmjspcare-2020-002831>.
35. Kaymaz D, Ergun P, Candemir I, et al. Pulmonary rehabilitation in interstitial lung diseases. *Tuberk Toraks*. 2013; 61: 295-302.
36. Kerti M, Kelemen K, Varga J. The effectiveness of pulmonary rehabilitation in comparison interstitial lung diseases and idiopathic pulmonary fibrosis. *J Pulm Respir Med*. 2018; 8: 1000475.
37. Keyser RE, Woolstenhulme JG, Chin LMK, et al. Cardiorespiratory function before and after aerobic exercise training in patients with interstitial lung disease. *J Cardiopulm Rehabil Prev*. 2015; 35: 47-55.
38. Khor YH, Saravanan K, Holland AE, et al. A mixed-methods pilot study of handheld fan for breathlessness in interstitial lung disease. *Sci Rep*. 2021; 11: 6874.
39. Kozu R, Senjyu H, Jenkins SC, et al. Differences in response to pulmonary rehabilitation in idiopathic pulmonary fibrosis and chronic obstructive pulmonary disease. *Respiration*. 2011; 81: 196-205.
40. Ku V, Janmeja AK, Aggarwal D, et al. Pulmonary rehabilitation in patients with interstitial lung diseases in an outpatient setting: a randomised controlled trial. *Indian J Chest Dis Allied Sci*. 2017; 59: 75-80.
41. Lindell KO, Olshansky E, Song M-K, et al. Impact of a disease-management program on symptom burden and health-related quality of life in patients with idiopathic pulmonary fibrosis and their care partners. *Heart Lung*. 2010; 39: 304-313.
42. Lindell KO, Klein SJ, Veatch MS, et al. Nurse-led palliative care clinical trial improves knowledge and preparedness in caregivers of patients with idiopathic pulmonary fibrosis. *Ann Am Thorac Soc*. 2021; 18: 1811-1821.

43. Lingner H, Buhr-Schinner H, Hummel S, et al. Short-term effects of a multimodal 3-week inpatient pulmonary rehabilitation programme for patients with sarcoidosis: the ProKaSaRe study. *Respiration*. 2018; 95: 343-353.
44. Magnani D, Lenoci G, Balduzzi S, et al. Effectiveness of support groups to improve the quality of life of people with idiopathic pulmonary fibrosis a pre-post test pilot study. *Acta Biomed*. 2017; 88: 5-12.
45. Matsuo S, Okamoto M, Ikeuchi T, et al. Early intervention of pulmonary rehabilitation for fibrotic interstitial lung disease is a favorable factor for short-term improvement in health-related quality of life. *J Clin Med*. 2021; 10: 3153.
46. Moor CC, Mostard RLM, Grutters JC, et al. Home monitoring in patients with idiopathic pulmonary fibrosis: a randomized controlled trial. *Am J Respir Crit Care Med*. 2020; 202: 393-401.
47. Moor CC, Leuven Slv, Wijsenbeek MS, et al. Feasibility of online home spirometry in systemic sclerosis-associated interstitial lung disease: a pilot study. *Rheumatol*. 2021; 60: 2467-2471.
48. Naji NA, Connor MC, Donnelly SC, et al. Effectiveness of pulmonary rehabilitation in restrictive lung disease. *J Cardiopulm Rehabil*. 2006; 26: 237-243.
49. Nasrat SA, El-Hady AAA, Hafiz HA, et al. The efficacy of pulmonary rehabilitation combined with threshold inspiratory muscle training and upper extremities exercises in patients with interstitial lung diseases. *Syst Rev Pharm*. 2021; 12: 527-533.
50. Naz I, Ozalevli S, Ozkan S, et al. Efficacy of a structured exercise program for improving functional capacity and quality of life in patients with stage 3 and 4 sarcoidosis: a randomized controlled trial. *J Cardiopulm Rehabil Prev*. 2018; 38: 124-130.
51. Near AM, Burudpakdee C, Viswanathan S, et al. Effect of a patient support program for idiopathic pulmonary fibrosis patients on medication persistence: a retrospective database analysis. *Adv Ther*. 2021; 38: 3888-3899.
52. Nishiyama O, Kondoh Y, Kimura T, et al. Effects of pulmonary rehabilitation in patients with idiopathic pulmonary fibrosis. *Respirology*. 2008; 13: 394-399.
53. Nolan CM, Polgar O, Schofield SJ, et al. Pulmonary rehabilitation in idiopathic pulmonary fibrosis and COPD: a propensity-matched real-world study. *Chest*. 2022; 161: 728-737.

54. Ochmann U, Kotschy-Lang N, Raab W, et al. Long-term efficacy of pulmonary rehabilitation in patients with occupational respiratory diseases. *Respiration*. 2012; 84: 396-405.
55. Ozalevli S, Karaali HK, Ilgin D, et al. Effect of home-based pulmonary rehabilitation in patients with idiopathic pulmonary fibrosis. *Multidiscip Respir Med*. 2010; 5: 31-37.
56. Perez-Bogerd S, Wuyts W, Barbier V, et al. Short and long-term effects of pulmonary rehabilitation in interstitial lung diseases: a randomised controlled trial. *Respir Res*. 2018; 19: 182.
57. Prajapat B, Sandhya AS, Menon B, et al. Effect of pulmonary rehabilitation on systemic inflammation muscle mass and functional status in interstitial lung diseases. *Int J Sci Res*. 2016; 5: 760-766.
58. Rammaert B, Leroy S, Cavestri B, et al. Home-based pulmonary rehabilitation in idiopathic pulmonary fibrosis. *Rev Mal Respir*. 2011; 28: e52-57.
59. Rifaat N, Anwar E, Ali YM, et al. Value of pulmonary rehabilitation in patients with idiopathic pulmonary fibrosis. *Egypt J Chest Dis Tuberc*. 2014; 63: 1013-1017.
60. Ryerson CJ, Cayou C, Topp F, et al. Pulmonary rehabilitation improves long-term outcomes in interstitial lung disease: a prospective cohort study. *Respir Med*. 2014; 108: 203-210.
61. Salhi B, Troosters T, Behaegel M, et al. Effects of pulmonary rehabilitation in patients with restrictive lung diseases. *Chest*. 2010; 137: 273-279.
62. Sanchez-Ramirez DC. Impact of pulmonary rehabilitation services in patients with different lung diseases. *J Clin Med*. 2022; 11: 407.
63. Satsuma Y, Ikesue H, Kusuda K, et al. Effectiveness of pharmacist-physician collaborative management for patients with idiopathic pulmonary fibrosis receiving pirfenidone. *Front Pharmacol*. 2020; 11: 529654.
64. Sciriha A, Lungaro-Mifsud S, Fsadni P, et al. Pulmonary rehabilitation in patients with interstitial lung disease: the effects of a 12-week programme. *Respir Med*. 2019; 146: 49-56.
65. Sgalla G, Cerri S, Ferrari R, et al. Mindfulness-based stress reduction in patients with interstitial lung diseases: a pilot, single-centre observational study on safety and efficacy. *BMJ Open Respir Res*. 2015; 2: e00065.

66. Sharp C, McCabe M, Hussain MJ, et al. Duration of benefit following completion of pulmonary rehabilitation in interstitial lung disease-an observational study. *QJM*. 2017; 110: 17-22.
67. Shen L, Zhang Y, Su Y, et al. New pulmonary rehabilitation exercise for pulmonary fibrosis to improve the pulmonary function and quality of life of patients with idiopathic pulmonary fibrosis: a randomized control trial. *Ann Palliat Med*. 2021; 10: 7289-7297.
68. Shimoda M, Takao S, Kokutou H, et al. In-hospital pulmonary rehabilitation after completion of primary respiratory disease treatment improves physical activity and ADL performance: a prospective intervention study. *Medicine*. 2021; 100: e28151.
69. Stanziola AA, Salzano A, D'Angelo R, et al. Idiopathic pulmonary fibrosis telemedicine management during COVID-19 outbreak. *Open Med*. 2022; 17: 689-693.
70. Swigris JJ, Fairclough DL, Morrison M, et al. Benefits of pulmonary rehabilitation in idiopathic pulmonary fibrosis. *Respir Care*. 2011; 56: 783-789.
71. Talwar A, Sahni S, John S, et al. Effects of pulmonary rehabilitation on fatigue severity scale in patients with lung disease. *Pneumonol Alergol Pol*. 2014; 82: 534-540.
72. Thombs BD, Kwakkenbos L, Levis B, et al. Effects of a multi-faceted education and support programme on anxiety symptoms among people with systemic sclerosis and anxiety during COVID-19 (SPIN-CHAT): a two-arm parallel, partially nested, randomised, controlled trial. *Lancet Rheumatol*. 2021; 3: e427-437.
73. Tonelli R, Cocconcelli E, Lanini B, et al. Effectiveness of pulmonary rehabilitation in patients with interstitial lung disease of different etiology: a multicenter prospective study. *BMC Pulm Med*. 2017; 17: 130.
74. Trivedi SJ. Effect of pulmonary rehabilitation on functional capacity of lungs and dyspnea in patient with silicosis in Anand district of Gujarat. *Indian J Physiother Occup Ther*. 2017; 11: 207-209.
75. Tsang EW, Kwok H, Chan AKY, et al. Outcomes of community-based and home-based pulmonary rehabilitation for pneumoconiosis patients: a retrospective study. *BMC Pulm Med*. 2018; 18: 133.
76. Vainshelboim B, Oliveira J, Yehoshua L, et al. Exercise training-based pulmonary rehabilitation program is clinically beneficial for idiopathic pulmonary fibrosis. *Respiration*. 2014; 88: 378-388.

77. Vainshelboim B, Oliveira J, Fox BD, et al. Long-term effects of a 12-week exercise training program on clinical outcomes in idiopathic pulmonary fibrosis. *Lung*. 2015; 193: 345-354.
78. Vainshelboim B, Fox BD, Kramer MR, et al. Short-term improvement in physical activity and body composition after supervised exercise training program in idiopathic pulmonary fibrosis. *Arch Phys Med Rehabil*. 2016; 97: 788-797.
79. Wallaert B, Duthoit L, Drumez E, et al. Long-term evaluation of home-based pulmonary rehabilitation in patients with fibrotic idiopathic interstitial pneumonias. *ERJ Open Res*. 2019; 5: 00045-2019.
80. Wallaert B, Kyheng M, Labreuche J, et al. Long-term effects of pulmonary rehabilitation on daily life physical activity of patients with stage IV sarcoidosis: a randomized controlled trial. *Respir Med Res*. 2020; 77: 1-7.
81. Zaki S, Moiz JA, Mujaddadi A, et al. Does inspiratory muscle training provide additional benefits during pulmonary rehabilitation in people with interstitial lung disease? A randomized control trial. *Physiother Theory Pract*. 2022; 39: 518-528.
82. Zhang Z, Tian Y, Yang J. Effects of pulmonary rehabilitation therapy combined with conventional drugs on BODE and pulmonary function indexes in elderly patients with interstitial pneumonia. *Pak J Med Sci*. 2022; 38: 1703-1707.
83. Zhou M, Zhang H, Li F, et al. Pulmonary Daoyin as a traditional Chinese medicine rehabilitation programme for patients with IPF: a randomized controlled trial. *Respirology*. 2021; 26: 360-369.
