# Supplementary material for: Self-management interventions for people with pulmonary fibrosis: a scoping review
Source: PubMed Central journal article supplement — Eur Respir Rev. 2023 Nov 1;32(170):230092. doi: 10.1183/16000617.0092-2023 (PMC10618910; doi:10.1183/16000617.0092-2023), 2023-11-01
Supplement: ERR-0092-2023.SUPPLEMENT3.pdf [file ERR-0092-2023.SUPPLEMENT3.pdf]

**Supplement 2.2. Comprehensive information of included studies that reported qualitative results**

| Study (year)<br>Country                 | Study aim<br>Study period                                                                                                                         | Design<br>Comparison<br>(where relevant) | Target population<br>Sample size<br>Age (years)                                                                                                                                                     | Intervention description                                                                                                                                                                                                                                                                                                                                      | Setting<br>Delivery format                                                                        | Themes reported                                                                                                                                                                                                                                                                                                                                                                                                                                                                                                                                                                                                                                                                                                                                                                                                                                                                                                                                                                                                                                                                                                                                                                         |
|-----------------------------------------|---------------------------------------------------------------------------------------------------------------------------------------------------|------------------------------------------|-----------------------------------------------------------------------------------------------------------------------------------------------------------------------------------------------------|---------------------------------------------------------------------------------------------------------------------------------------------------------------------------------------------------------------------------------------------------------------------------------------------------------------------------------------------------------------|---------------------------------------------------------------------------------------------------|-----------------------------------------------------------------------------------------------------------------------------------------------------------------------------------------------------------------------------------------------------------------------------------------------------------------------------------------------------------------------------------------------------------------------------------------------------------------------------------------------------------------------------------------------------------------------------------------------------------------------------------------------------------------------------------------------------------------------------------------------------------------------------------------------------------------------------------------------------------------------------------------------------------------------------------------------------------------------------------------------------------------------------------------------------------------------------------------------------------------------------------------------------------------------------------------|
| Albright <i>et al</i> (2016) (1)<br>USA | Analyse content of three websites to better understand the needs and interests of people with PF and their loved ones.<br><br>Aug 2013 - May 2014 | Qualitative content analysis             | PF<br><br>* <i>Intervention was open to public</i><br>Users engaged with blog entries = 149<br>Users started forum strings = 23<br>Users responded to forum strings = 26<br><br>Age: <i>unclear</i> | Three public websites (2 blogs; 1 forum) aimed at raising disease awareness, educate, and providing platforms for exchanging information and experiences.<br><br>Components:<br><ul style="list-style-type: none"> <li>• Patient education</li> <li>• Peer support</li> </ul> Materials used:<br><ul style="list-style-type: none"> <li>• Websites</li> </ul> | Community<br><br><ul style="list-style-type: none"> <li>• Remote</li> <li>• Individual</li> </ul> | Reader-participants primarily used the websites for one or more of the following three purposes:<br><ul style="list-style-type: none"> <li>• To share their personal narratives about PF</li> <li>• To seek information from the PF community</li> <li>• To offer contributions to the PF community</li> </ul> Content generated by reader-participants included:<br><ul style="list-style-type: none"> <li>• Personal narratives about their own PF experiences or their loved one’s experiences (n=264)</li> <li>• Questions seeking information about PF-related topics (n=181)</li> <li>• Expressions of gratitude for the blog(s), a specific post, or a reply (n=179)</li> <li>• Descriptions of activities or behaviours personally found to be helpful with PF symptoms (n=64)</li> <li>• Sharing of resources or information about PF (n=62)</li> <li>• Supportive comments from one PF sufferer to another (n=41)</li> <li>• Requests for new or additional PF-related posts or research (n=28)</li> <li>• Clarification questions about post content (n=11)</li> <li>• Other casual comments not relevant to PF such as polite remarks concluding a thread (n=78)</li> </ul> |

|                                                 |                                                                                                                                                                                |                                                                                                                                                                                                                  |                                                                                                                                                                                                                                                                    |                                                                                                                                                                                                                                                                                                                                                                                                                                                                                                                                                          |                                                                                              |                                                                                                                                                                                                                                                                                                                                                                                                                                                                                                                                                                                                                                                                                                                                                                                                                                                                                                                                                                                                                                                                                                                                                                                                                                                                                                                                                                                                                                                          |
|-------------------------------------------------|--------------------------------------------------------------------------------------------------------------------------------------------------------------------------------|------------------------------------------------------------------------------------------------------------------------------------------------------------------------------------------------------------------|--------------------------------------------------------------------------------------------------------------------------------------------------------------------------------------------------------------------------------------------------------------------|----------------------------------------------------------------------------------------------------------------------------------------------------------------------------------------------------------------------------------------------------------------------------------------------------------------------------------------------------------------------------------------------------------------------------------------------------------------------------------------------------------------------------------------------------------|----------------------------------------------------------------------------------------------|----------------------------------------------------------------------------------------------------------------------------------------------------------------------------------------------------------------------------------------------------------------------------------------------------------------------------------------------------------------------------------------------------------------------------------------------------------------------------------------------------------------------------------------------------------------------------------------------------------------------------------------------------------------------------------------------------------------------------------------------------------------------------------------------------------------------------------------------------------------------------------------------------------------------------------------------------------------------------------------------------------------------------------------------------------------------------------------------------------------------------------------------------------------------------------------------------------------------------------------------------------------------------------------------------------------------------------------------------------------------------------------------------------------------------------------------------------|
| <p>Bajwah <i>et al</i> (2015) (2)<br/>UK</p>    | <p>Examine the effects of Hospital2Home program on palliative care concerns and evaluate the feasibility and acceptability of the intervention.</p> <p>Oct 2011 - Dec 2013</p> | <p>Mixed methods:</p> <ul style="list-style-type: none"> <li>Phase II fast-track RCT</li> <li>Semi-structured interviews</li> </ul> <p>Case conference within 1 week (IG) vs Case conference at 4 weeks (CG)</p> | <p>IPF (82% in CG; 85% in IG), fibrotic non-specific interstitial pneumonia</p> <p>10 completed interviews<br/>Patients=5<br/>Carers=5</p> <p>Mean age (SD):<br/>CG – patients=70.6 (10.3); carers=60.3 (13.1)<br/>IG – patients=67.1 (10.9); carers=61.3 (14)</p> | <p>One case conference with 3 follow ups (Hospital2Home)</p> <ul style="list-style-type: none"> <li>Duration of intervention: 2 months</li> <li>Frequency of follow ups: at 2 weeks, 1 month and 2 months</li> <li>Duration of case conference: approximately 90min</li> </ul> <p>Components:</p> <ul style="list-style-type: none"> <li>Palliative care</li> <li>Discussions of physical, psychological, social, spiritual concerns</li> <li>Individualised care plan</li> <li>EOL planning</li> <li>Goal setting</li> <li>Patient education</li> </ul> | <p>Home</p> <ul style="list-style-type: none"> <li>Remote</li> <li>Individual</li> </ul>     | <p>Eight themes:</p> <ul style="list-style-type: none"> <li><b>Support in the community</b> – increased awareness of community support; all participants received support from community HCPs through the study.</li> <li><b>Individual care plans and practical problems addressed</b> – issues were addressed quickly after having the case conference.</li> <li><b>Coordination of care and efficiency</b> – improved communication across the primary and specialist care setting; care plan gives clear information about the HCPs involved in the patient’s care.</li> <li><b>Crisis management</b> – participants felt relieved to have crisis management plans with direct contact numbers for HCP 24/7.</li> <li><b>Palliative care and psychological support</b> – improved understanding of what palliative care and who it is suitable for; improved psychological symptoms; participants recognised that support for loved ones and carers was needed.</li> <li><b>Symptom control</b> – clear evidence based strategies on managing symptoms within the care plan were seen as invaluable.</li> <li><b>Empowering HCPs</b> – the study guided HCPs in conducting conversation around ACP.</li> <li><b>Advance care planning</b> – the study facilitated introduction of palliative care at a specialist centre and open discussion between the patient and their family members; participants were grateful to discuss options.</li> </ul> |
| <p>Bischoff <i>et al</i> (2021) (3)<br/>USA</p> | <p>Examine the effects of a multidisciplinary palliative care model on access to palliative care</p>                                                                           | <p>Mixed methods:</p> <ul style="list-style-type: none"> <li>Longitudinal</li> <li>Open-ended interviews</li> </ul>                                                                                              | <p>Various ILD (15% IPF)</p> <p>17 completed interviews<br/>Patients = 13</p>                                                                                                                                                                                      | <p>Multidisciplinary specialty palliative care model including meeting with a multidisciplinary healthcare team and follow up telephone calls</p> <ul style="list-style-type: none"> <li>Duration: median 9.9 months</li> </ul>                                                                                                                                                                                                                                                                                                                          | <p>Outpatient / home</p> <ul style="list-style-type: none"> <li>In person/ remote</li> </ul> | <p>Ways that the intervention was helpful:</p> <ul style="list-style-type: none"> <li>Supportive, compassionate, patient-centred</li> <li>Available, responsive, reliable</li> <li>Comprehensive, coordinated, interdisciplinary care</li> </ul>                                                                                                                                                                                                                                                                                                                                                                                                                                                                                                                                                                                                                                                                                                                                                                                                                                                                                                                                                                                                                                                                                                                                                                                                         |

|                                               |                                                                                              |                              |                                                                            |                                                                                                                                                                                                                                                                                                                                                                                |                                                              |                                                                                                                                                                                                                                                                                                                                                                                                                                                                                                                                                                                                                                                                                                                                                                                                                                                                                                                                                               |
|-----------------------------------------------|----------------------------------------------------------------------------------------------|------------------------------|----------------------------------------------------------------------------|--------------------------------------------------------------------------------------------------------------------------------------------------------------------------------------------------------------------------------------------------------------------------------------------------------------------------------------------------------------------------------|--------------------------------------------------------------|---------------------------------------------------------------------------------------------------------------------------------------------------------------------------------------------------------------------------------------------------------------------------------------------------------------------------------------------------------------------------------------------------------------------------------------------------------------------------------------------------------------------------------------------------------------------------------------------------------------------------------------------------------------------------------------------------------------------------------------------------------------------------------------------------------------------------------------------------------------------------------------------------------------------------------------------------------------|
|                                               | including treatments and ACP.<br><br>May 2018 – Feb 2020                                     |                              | Carers = 4<br><br>Mean age (95% CI):<br>Whole cohort=75.8<br>(72.4 – 79.2) | (ranged 2.7-19.7)<br>• Number of visits: median 3<br>(ranged 1-9)<br><br>Components:<br>• Palliative care<br>• Managing physical and psychological symptoms<br>• Assessing and promoting function including referral to PR<br>• Discussion of the disease, treatment options and prognosis<br>• Psychosocial support<br>• Managing medications<br>• ACP and advance directives | • Individual                                                 | <ul style="list-style-type: none"> <li>• Symptom management, reduction of medication side effects</li> <li>• Help with illness understanding and advance care planning</li> <li>• Helpful to family</li> <li>• Video visits improved convenience, access</li> </ul> <p>Ways that the intervention complicated or detracted from care:</p> <ul style="list-style-type: none"> <li>• Provided differing opinions</li> </ul> <p>Expectations of the intervention:</p> <ul style="list-style-type: none"> <li>• Assumed it was for advanced stages of illness or end-of-life</li> <li>• Preparing for the future</li> <li>• Did not know what to expect</li> </ul> <p>The meaning of palliative care:</p> <ul style="list-style-type: none"> <li>• Emotional comfort</li> <li>• Physical comfort</li> <li>• Maximise quality of life</li> <li>• Coping with a serious and terminal illness</li> <li>• Team-based care</li> <li>• A step before hospice</li> </ul> |
| Duck <i>et al</i> (2015) (4)<br>UK<br>Austria | Describe the structure and benefits of IPF Care program in two countries.<br><br>2013 - 2014 | Post intervention evaluation | IPF<br><br>UK=465<br>Austria=27<br><br>Mean age: <i>unclear</i>            | Patient support program for people prescribed pirfenidone including meeting with a HCP and follow up telephone calls<br><br>• Frequency:<br>UK – 1 initial telephone call; then weekly or fortnightly for month 1; tailored to the participant thereafter.<br>Austria – 1 initial telephone call and 1 in person meeting; then                                                 | Outpatient / home<br><br>• In person/ remote<br>• Individual | Reasons for the score that participants gave to a question ‘Do you think the IPF Care program would be useful to other patients taking Esbriet?’:<br><br>• “Knowing support is a phone call away makes me feel less panicky”<br>• “It provides a human element”<br>• “It is helpful to know someone is keeping an eye on you”<br>• “Being able to speak to someone over the                                                                                                                                                                                                                                                                                                                                                                                                                                                                                                                                                                                   |

|                                              |                                                                                                                                                                                                 |                            |                                                                                   |                                                                                                                                                                                                                                                                                                                                                                                                                                                                                                                                                                                                                                                                                       |                                                                                                               |                                                                                                                                                                                                                                                                                                                                                                                                                                                                                                                                                                                                             |
|----------------------------------------------|-------------------------------------------------------------------------------------------------------------------------------------------------------------------------------------------------|----------------------------|-----------------------------------------------------------------------------------|---------------------------------------------------------------------------------------------------------------------------------------------------------------------------------------------------------------------------------------------------------------------------------------------------------------------------------------------------------------------------------------------------------------------------------------------------------------------------------------------------------------------------------------------------------------------------------------------------------------------------------------------------------------------------------------|---------------------------------------------------------------------------------------------------------------|-------------------------------------------------------------------------------------------------------------------------------------------------------------------------------------------------------------------------------------------------------------------------------------------------------------------------------------------------------------------------------------------------------------------------------------------------------------------------------------------------------------------------------------------------------------------------------------------------------------|
|                                              |                                                                                                                                                                                                 |                            |                                                                                   | <p>weekly or fortnightly for month 1; monthly for month 2-4; once every 4-6 weeks thereafter with additional in person meeting once every 6-8 weeks as required</p> <p>Components:</p> <ul style="list-style-type: none"> <li>• Patient education and support</li> <li>• IPF care meeting with other patients, family and friends, and IPF experts (Austria only)</li> </ul> <p>Materials used:</p> <ul style="list-style-type: none"> <li>• Information booklets</li> <li>• 'My health journal' booklet</li> <li>• Visit log (completed by nurse to document issues with the disease or treatment; participants encouraged to bring the log to their clinic appointments)</li> </ul> |                                                                                                               | <p>phone about my problems has been very reassuring, rather than having to wait until my next clinic visit"</p> <ul style="list-style-type: none"> <li>• "The extra support is reassuring"</li> <li>• "There is always help on the end of the phone when you are struggling with breathing"</li> <li>• "Gives you more confidence and peace of mind"</li> <li>• "It enables me to discuss all aspects of IPF and ask questions that may seem insignificant"</li> <li>• "They have changed my life, they have given me freedom"</li> <li>• "They put my mind at rest regarding the side effects".</li> </ul> |
| Hoffman <i>et al</i> (2021) (5)<br>Australia | Determine the proportion of people with ILD referred to PR program; and explore participants' experiences and reasons of non-participation or non-completion of the program.<br><br>2015 – 2019 | Semi-structured interviews | Various ILD (43% IPF)<br><br>21 completed interviews<br><br>Mean age (SD): 71 (6) | * <i>Same intervention as Dowman et al (2017)</i><br><br>PR program <ul style="list-style-type: none"> <li>• Duration: 8 weeks</li> <li>• Frequency: twice/week</li> <li>• Number of sessions: 16</li> </ul> <p>Components:</p> <ul style="list-style-type: none"> <li>• Supervised exercise training</li> <li>• Unsupervised home exercise program</li> <li>• Optional educational lectures</li> </ul>                                                                                                                                                                                                                                                                               | Outpatient <ul style="list-style-type: none"> <li>• In person/ remote</li> <li>• Group/ individual</li> </ul> | Three major themes: <ul style="list-style-type: none"> <li>• Valued components of PR program<br/>Subthemes: <ul style="list-style-type: none"> <li>- Supervision/individualised program</li> <li>- Build confidence in exercising</li> <li>- Education sessions</li> <li>- Peer support</li> </ul> </li> <li>• Limited knowledge about PR</li> <li>• Barriers to attending PR<br/>Subthemes: <ul style="list-style-type: none"> <li>- Lack of perceived benefits</li> <li>- Fear of exercise</li> <li>- Accessibility</li> </ul> </li> </ul>                                                                |

|                                           |                                                                                                                                                                                                                                 |                                                                                                                                              |                                                                                                              |                                                                                                                                                                                                                                                                                                                                                                                                                                                                                                                             |                                                                                                              |                                                                                                                                                                                                                                                                                                                                                                                                                                                                                                                                                                                                                                                                                                                            |
|-------------------------------------------|---------------------------------------------------------------------------------------------------------------------------------------------------------------------------------------------------------------------------------|----------------------------------------------------------------------------------------------------------------------------------------------|--------------------------------------------------------------------------------------------------------------|-----------------------------------------------------------------------------------------------------------------------------------------------------------------------------------------------------------------------------------------------------------------------------------------------------------------------------------------------------------------------------------------------------------------------------------------------------------------------------------------------------------------------------|--------------------------------------------------------------------------------------------------------------|----------------------------------------------------------------------------------------------------------------------------------------------------------------------------------------------------------------------------------------------------------------------------------------------------------------------------------------------------------------------------------------------------------------------------------------------------------------------------------------------------------------------------------------------------------------------------------------------------------------------------------------------------------------------------------------------------------------------------|
|                                           |                                                                                                                                                                                                                                 |                                                                                                                                              |                                                                                                              | <p>Materials used:</p> <ul style="list-style-type: none"> <li>• Home exercise diary</li> <li>• Education manual</li> </ul>                                                                                                                                                                                                                                                                                                                                                                                                  |                                                                                                              | - Too sick to attend                                                                                                                                                                                                                                                                                                                                                                                                                                                                                                                                                                                                                                                                                                       |
| Igai <i>et al</i> (2022) (6)<br>Japan     | <p>Evaluate the effects of a dignity-centred palliative care program on self-esteem, QoL, anxiety, depression, dyspnoea, cough, program satisfaction and the acceptability of the program.</p> <p>18 Apr 2018 – 18 Mar 2019</p> | <p>Mixed methods:</p> <ul style="list-style-type: none"> <li>• Pre-post study (prospective)</li> <li>• Semi-structured interviews</li> </ul> | <p>IPF</p> <p>12</p> <p>Mean age (SD): 77.3 (4.6)</p>                                                        | <p>Dignity-centred palliative care program including clinic and home visits</p> <ul style="list-style-type: none"> <li>• Duration: 45 days</li> <li>• Frequency: 2 clinic visits; 1 home visit</li> </ul> <p>Components:</p> <ul style="list-style-type: none"> <li>• Palliative care</li> <li>• Discussion of various topics including self-management, symptom management and observation, daily activities and life review</li> </ul> <p>Materials used:</p> <ul style="list-style-type: none"> <li>• Booklet</li> </ul> | <p>Outpatient / home</p> <ul style="list-style-type: none"> <li>• In person</li> <li>• Individual</li> </ul> | <p>Nine participants who maintained or had an improvement in self-esteem identified the following themes:</p> <ul style="list-style-type: none"> <li>• Getting information about illness</li> <li>• Changing thinking and behaviours to cope with physical and psychological distress</li> <li>• Supported by interactive interchange</li> <li>• Holding a positive attitude for living with IPF</li> </ul> <p>Three participants who had a decline in self-esteem identified the following themes:</p> <ul style="list-style-type: none"> <li>• Uncertainty about the progress of IPF</li> <li>• Uncertainty about their prognosis</li> <li>• Continued self-management</li> <li>• Do not need the life review</li> </ul> |
| Kalluri <i>et al</i> (2021) (7)<br>Canada | <p>Explore the effects of self-management education and action planning on self-efficacy, perceptions of symptoms and symptom management strategies.</p> <p>Aug 2018 - Jan 2019</p>                                             | <p>Mixed methods:</p> <ul style="list-style-type: none"> <li>• Post intervention evaluation</li> <li>• Semi-structured interviews</li> </ul> | <p>IPF</p> <p>Questionnaires=12</p> <p>Semi-structured interviews=13</p> <p>Mean age (range): 71 (59-83)</p> | <p><i>* Same intervention as Kalluri et al (2018) with additional focus on patient education and action planning</i></p> <p>Multidisciplinary care model that adopts an early integrated palliative approach focusing on early symptom management and ACP with emphasis on community-based care</p> <ul style="list-style-type: none"> <li>• Duration: mean month between first visit and death (SD) – IG=14.4 (13.3); CG=17.4 (17)</li> </ul>                                                                              | <p>Outpatient / home</p> <ul style="list-style-type: none"> <li>• In person</li> <li>• Individual</li> </ul> | <p>Self-management strategies and education appeared to facilitate participants to manage their illness with confidence and dignity.</p> <p>Four non-discrete themes:</p> <ul style="list-style-type: none"> <li>• Participants integrated and personalised coping strategies</li> <li>• Participants became intentional and confident</li> <li>• Participants shifted focus to living well</li> <li>• Participants engaged in anticipatory planning</li> </ul>                                                                                                                                                                                                                                                            |

|                                           |                                                                                                                                                                                                                  |                                                                                                                                                                    |                                                                                                                                   |                                                                                                                                                                                                                                                                                                                                                                                                                                           |                                                                                                      |                                                                                                                                                                                                                                                                                                                                                                                                                                                                                                                                                                                                                                                                       |
|-------------------------------------------|------------------------------------------------------------------------------------------------------------------------------------------------------------------------------------------------------------------|--------------------------------------------------------------------------------------------------------------------------------------------------------------------|-----------------------------------------------------------------------------------------------------------------------------------|-------------------------------------------------------------------------------------------------------------------------------------------------------------------------------------------------------------------------------------------------------------------------------------------------------------------------------------------------------------------------------------------------------------------------------------------|------------------------------------------------------------------------------------------------------|-----------------------------------------------------------------------------------------------------------------------------------------------------------------------------------------------------------------------------------------------------------------------------------------------------------------------------------------------------------------------------------------------------------------------------------------------------------------------------------------------------------------------------------------------------------------------------------------------------------------------------------------------------------------------|
|                                           |                                                                                                                                                                                                                  |                                                                                                                                                                    |                                                                                                                                   | <ul style="list-style-type: none"> <li>Frequency: once every 3 months (clinic visits); in between clinic visits (community care team visits)</li> </ul> <p>Components:</p> <ul style="list-style-type: none"> <li>Patient education</li> <li>ACP</li> <li>Action plans (written/verbal)</li> <li>Goal setting</li> </ul>                                                                                                                  |                                                                                                      |                                                                                                                                                                                                                                                                                                                                                                                                                                                                                                                                                                                                                                                                       |
| Khor <i>et al</i> (2021) (8)<br>Australia | <p>Test the feasibility and acceptability of conducting a RCT to evaluate the use of a hand-held fan for dyspnoea management.</p> <ul style="list-style-type: none"> <li>Study period: <i>unclear</i></li> </ul> | <p>Mixed methods:</p> <ul style="list-style-type: none"> <li>RCT</li> <li>Semi-structured interviews</li> </ul> <p>Hand-held fan (IG) vs No hand-held fan (CG)</p> | <p>Fibrotic ILD (33% IPF)</p> <p>30 completed interviews</p> <p>Mean age (SD):<br/>CG=71.7 (7.3)<br/>IG=73.7 (10.5)</p>           | <p>Use of hand-held fan</p> <ul style="list-style-type: none"> <li>Duration: 2 weeks</li> </ul> <p><i>Frequency and number of times use depends on the participant</i></p> <p>Components:</p> <ul style="list-style-type: none"> <li>Participants received instructions to use the fan at home and during outing for symptom management</li> </ul> <p>Materials used:</p> <ul style="list-style-type: none"> <li>Hand-held fan</li> </ul> | <p>Community / Home</p> <ul style="list-style-type: none"> <li>Remote</li> <li>Individual</li> </ul> | <p>Three major themes:</p> <ul style="list-style-type: none"> <li>Varying initial attitudes towards using a handheld fan as an intervention (scepticism, uncertainties and expectation of beneficial effects)</li> <li>Benefits of using a handheld fan (relieve of dyspnoea sensation, a sense of security, relaxation and the ease of use in daily life)</li> <li>Relative effects of handheld fans, oxygen, and inhaler therapies for symptom management</li> </ul> <p>One minor theme:</p> <ul style="list-style-type: none"> <li>Challenges of using a handheld fan (embarrassment when using the fan in public and difficulties with sourcing a fan)</li> </ul> |
| Lindell <i>et al</i> (2010) (9)<br>USA    | <p>Test whether participation in a disease management program improves symptom burden and perceptions of QoL in people with IPF and their carers.</p>                                                            | <p>Mixed methods:</p> <ul style="list-style-type: none"> <li>RCT</li> <li>Open-ended interviews</li> </ul> <p>PRISM program (IG) vs No PRISM program (CG)</p>      | <p>IPF</p> <p>21 patient/carer dyads<br/>CG=11<br/>IG=10</p> <p>Mean age (SD):<br/>CG – patients=67.1 (11.9); carers=67 (8.6)</p> | <p>Disease management program (PRISM: Program to Reduce Symptoms and Improve Lifestyle Management)</p> <ul style="list-style-type: none"> <li>Duration: 6 weeks</li> <li>Frequency: weekly</li> <li>Number of sessions: 6</li> </ul> <p>Components:</p>                                                                                                                                                                                   | <p>Community</p> <ul style="list-style-type: none"> <li>In person</li> <li>Group</li> </ul>          | <p>Three themes:</p> <ul style="list-style-type: none"> <li>Did not feel isolated when participating in a disease management program</li> <li>Able to put my disease into perspective</li> <li>Felt it was important to participate in research to help others with the disease</li> </ul>                                                                                                                                                                                                                                                                                                                                                                            |

|                                              |                                                                                                                                                           |                                                            |                                                                                                                                                 |                                                                                                                                                                                                                                                                                                                                                                                                                                                                     |                                                                                                                |                                                                                                                                                                                                                                                                                                                                                                                                                                                                                                                                                                                                                                                                               |
|----------------------------------------------|-----------------------------------------------------------------------------------------------------------------------------------------------------------|------------------------------------------------------------|-------------------------------------------------------------------------------------------------------------------------------------------------|---------------------------------------------------------------------------------------------------------------------------------------------------------------------------------------------------------------------------------------------------------------------------------------------------------------------------------------------------------------------------------------------------------------------------------------------------------------------|----------------------------------------------------------------------------------------------------------------|-------------------------------------------------------------------------------------------------------------------------------------------------------------------------------------------------------------------------------------------------------------------------------------------------------------------------------------------------------------------------------------------------------------------------------------------------------------------------------------------------------------------------------------------------------------------------------------------------------------------------------------------------------------------------------|
|                                              | <ul style="list-style-type: none"> <li>Study period: <i>unclear</i></li> </ul>                                                                            |                                                            | <p>IG – patients=65.2 (10.3); carers=63.3 (12.7)</p>                                                                                            | <ul style="list-style-type: none"> <li>Patient education</li> </ul> <p>Materials used:</p> <ul style="list-style-type: none"> <li>A book – ‘Feeling good: the new mood therapy’ for both groups; IG used the book in group education sessions</li> </ul>                                                                                                                                                                                                            |                                                                                                                |                                                                                                                                                                                                                                                                                                                                                                                                                                                                                                                                                                                                                                                                               |
| Lo <i>et al</i> (2007) (10)<br>China         | <p>Examine results of a community rehabilitation program held in a rural village.</p> <p>Mar 2005 - Dec 2005</p>                                          | <p>Post intervention evaluation – qualitative feedback</p> | <p>Pneumoconiosis</p> <p>1<sup>st</sup> phase=40<br/>2<sup>nd</sup> phase=14</p> <p>Mean age (range):<br/>2<sup>nd</sup> phase=41.1 (28-48)</p> | <p>2-phase rehabilitation program including one initial group education and two home visits</p> <ul style="list-style-type: none"> <li>Frequency: home visits delivered 2 months apart</li> <li>Number of session/visits: 1 group sessions (phase 1); 2 home visits (phase 2)</li> </ul> <p>Components:</p> <ul style="list-style-type: none"> <li>Patient education</li> <li>Home management and modification (phase 2)</li> <li>Goal setting (phase 2)</li> </ul> | <p>Community / home</p> <ul style="list-style-type: none"> <li>In person</li> <li>Group/ individual</li> </ul> | <p>General participant feedback on the program:</p> <ul style="list-style-type: none"> <li>A better knowledge and understanding of pneumoconiosis</li> <li>Understanding that there were strategies in coping with and managing the disease and dyspnoea in daily living</li> <li>Demonstration of a strong motivation to learn the coping strategies for preventing further deterioration of their health</li> <li>Reduced anxiety</li> <li>Increased confidence in performing light duties in farming and household tasks</li> </ul>                                                                                                                                        |
| Moor <i>et al</i> (2021) (11)<br>Netherlands | <p>Investigate the feasibility of an online home monitoring application and optimal frequency of home spirometry.</p> <p>Study period: <i>unclear</i></p> | <p>Pre-post study (prospective)</p>                        | <p>Sclerosis-associated ILD</p> <p>10</p> <p>Mean age (SD):<br/>60.3 (9.9)</p>                                                                  | <p>Home spirometry and monitoring application (ILD-online)</p> <ul style="list-style-type: none"> <li>Duration: 3 months</li> <li>Frequency: daily home spirometry for the first 6 weeks; 3 times/week for the second 6 weeks</li> </ul> <p>Components:</p> <ul style="list-style-type: none"> <li>Home spirometry</li> <li>Self-monitoring and online reporting of symptoms</li> <li>Access to an overview of spirometry results</li> </ul>                        | <p>Home</p> <ul style="list-style-type: none"> <li>Remote</li> <li>Individual</li> </ul>                       | <p>Patient experiences with home monitoring were positive:</p> <ul style="list-style-type: none"> <li>All participants considered the monitoring application and spirometer easy to use. None considered home spirometry burdensome</li> <li>90% of participants found it pleasant to see an overview of their lung function over time and would be willing to perform weekly FVC measurements for a prolonged period of time for study purposes</li> <li>70% of participants stated that home monitoring could provide them with more insights into their disease course</li> <li>Only two participants reported that they had encountered minor technical issues</li> </ul> |

|                                   |                                                                                                                                                                                                                         |                                                                                                                                                       |                                                                          |                                                                                                                                                                                                                                                                                                                                                                                                                                                                     |                                                                                                                    |                                                                                                                                                                                                                                                                                                                                                                                                                                                                                                                                                                                                                                                                                                                                                                                                                                                                                                                                                                                                                                         |
|-----------------------------------|-------------------------------------------------------------------------------------------------------------------------------------------------------------------------------------------------------------------------|-------------------------------------------------------------------------------------------------------------------------------------------------------|--------------------------------------------------------------------------|---------------------------------------------------------------------------------------------------------------------------------------------------------------------------------------------------------------------------------------------------------------------------------------------------------------------------------------------------------------------------------------------------------------------------------------------------------------------|--------------------------------------------------------------------------------------------------------------------|-----------------------------------------------------------------------------------------------------------------------------------------------------------------------------------------------------------------------------------------------------------------------------------------------------------------------------------------------------------------------------------------------------------------------------------------------------------------------------------------------------------------------------------------------------------------------------------------------------------------------------------------------------------------------------------------------------------------------------------------------------------------------------------------------------------------------------------------------------------------------------------------------------------------------------------------------------------------------------------------------------------------------------------------|
|                                   |                                                                                                                                                                                                                         |                                                                                                                                                       |                                                                          | <ul style="list-style-type: none"> <li>• Patient education</li> <li>• eConsultation</li> </ul> <p>Materials used:</p> <ul style="list-style-type: none"> <li>• Mobile application</li> <li>• Hand-held spirometer</li> <li>• Tablet</li> <li>• Video and weblink providing information about IPF and medication use</li> </ul>                                                                                                                                      |                                                                                                                    | <ul style="list-style-type: none"> <li>• All participants would recommend home monitoring to other patients with sclerosis-associated ILD</li> <li>• 90% would like to continue using the monitoring application in routine daily care</li> </ul>                                                                                                                                                                                                                                                                                                                                                                                                                                                                                                                                                                                                                                                                                                                                                                                       |
| Sharp <i>et al</i> (2017) (12) UK | <p>Determine the sustained benefits of a PR program; identify baseline characteristics associated with the responses; and evaluate PR experiences using qualitative assessment.</p> <p>Study period: <i>unclear</i></p> | <p>Mixed methods:</p> <ul style="list-style-type: none"> <li>• Pre-post study (retrospective audit)</li> <li>• Semi-structured focus group</li> </ul> | <p>Various ILD (35% IPF)</p> <p>79</p> <p>Mean age (SD): 68.8 (11.9)</p> | <p>PR program</p> <ul style="list-style-type: none"> <li>• Duration: 6 weeks</li> <li>• Frequency: twice/week</li> <li>• Number of sessions: 12</li> </ul> <p>Components:</p> <ul style="list-style-type: none"> <li>• Supervised exercise training</li> <li>• Unsupervised home exercise program</li> <li>• Educational sessions</li> </ul> <p>Materials used:</p> <ul style="list-style-type: none"> <li>• PowerPoint presentation</li> <li>• Handouts</li> </ul> | <p>Outpatient</p> <ul style="list-style-type: none"> <li>• In person/remote</li> <li>• Group/individual</li> </ul> | <p>Suggestions for development of PR program in ILD:</p> <ul style="list-style-type: none"> <li>• Longer sessions to give more time for exercise</li> <li>• Longer course duration</li> <li>• To enable carers to be present for at least some of the course, to benefit from the educational component</li> <li>• On-going supervised exercise sessions after course completion</li> <li>• Specific ILD focused lectures and content more tailored to ILD concerns (e.g. oxygen use, diet, control of breathing and entitlements to social support and benefits advice)</li> </ul> <p>Experience of the PR program:</p> <ul style="list-style-type: none"> <li>• All felt the program was valuable, especially the social elements and its role in reducing feelings of isolation</li> <li>• Many felt there was insufficient time for exercise</li> <li>• The program was too short</li> <li>• Concern over the predominance of COPD, with participants reporting feeling distinct and isolated from the group, as well as</li> </ul> |



|                                                        |                                                                                               |                                             |                                                                                                                                                                                                                                                                             |                                                                                                                                                                                                                                                                                                                                                         |                                                                                                          |                                                                                                                                                                                                                                                                                                                                                                                                                                                                                                                                                                                                                                                                                                                                                |
|--------------------------------------------------------|-----------------------------------------------------------------------------------------------|---------------------------------------------|-----------------------------------------------------------------------------------------------------------------------------------------------------------------------------------------------------------------------------------------------------------------------------|---------------------------------------------------------------------------------------------------------------------------------------------------------------------------------------------------------------------------------------------------------------------------------------------------------------------------------------------------------|----------------------------------------------------------------------------------------------------------|------------------------------------------------------------------------------------------------------------------------------------------------------------------------------------------------------------------------------------------------------------------------------------------------------------------------------------------------------------------------------------------------------------------------------------------------------------------------------------------------------------------------------------------------------------------------------------------------------------------------------------------------------------------------------------------------------------------------------------------------|
|                                                        |                                                                                               |                                             |                                                                                                                                                                                                                                                                             |                                                                                                                                                                                                                                                                                                                                                         |                                                                                                          | <p>feelings of stigma due to oxygen use</p> <ul style="list-style-type: none"> <li>• Many patients expressed anxiety about unsupervised exercise after PR</li> </ul>                                                                                                                                                                                                                                                                                                                                                                                                                                                                                                                                                                           |
| <p>Tikellis <i>et al</i> (2020) (13)<br/>Australia</p> | <p>Report the experiences of people participated in the Peer Connect Service.</p> <p>2018</p> | <p>Semi-structured telephone interviews</p> | <p>PF</p> <p>32</p> <p>Primary peer=16</p> <p>Secondary peer=15</p> <p>Both primary and secondary peer=1</p> <p><i>* Primary peers – those agreed to initiate contact</i></p> <p><i>* Secondary peers – those seeking a peer match</i></p> <p>Mean age (SD):<br/>71 (7)</p> | <p>Peer Connect Service that matches people with PF with similar disease experience and demographic background for mutual support</p> <p>Number of staff contacts: 7</p> <p><i>Duration and frequency of contacts between peers depends on the participants</i></p> <p>Components:</p> <ul style="list-style-type: none"> <li>• Peer support</li> </ul> | <p>Community / home</p> <ul style="list-style-type: none"> <li>• Remote</li> <li>• Individual</li> </ul> | <p>Major themes identified by both primary and secondary peers:</p> <p>Major themes:</p> <ul style="list-style-type: none"> <li>• Positive value of shared experience</li> <li>• Mutual support</li> <li>• Importance of shared personal characteristics</li> <li>• Face-to-face meetings desirable</li> <li>• Ongoing contact not needed</li> </ul> <p>Minor theme:</p> <ul style="list-style-type: none"> <li>• Death of a peer</li> </ul> <p>Themes identified by primary peers only:</p> <p>Major themes:</p> <ul style="list-style-type: none"> <li>• Role is not to give medical advice</li> <li>• Setting limits</li> </ul> <p>Minor theme</p> <ul style="list-style-type: none"> <li>• Unmet support needs of primary peers</li> </ul> |

## References

1. Albright K, Walker T, Baird S, et al. Seeking and sharing: why the pulmonary fibrosis community engages the web 2.0 environment. *BMC Pulm Med*. 2016; 16: 4.
2. Bajwah S, Ross JR, Wells AU, et al. Palliative care for patients with advanced fibrotic lung disease: a randomised controlled phase II and feasibility trial of a community case conference. *Thorax*. 2015; 70: 830-839.
3. Bischoff KE, Choi S, Su A, et al. Better together: a mixed-methods study of palliative care co-management for patients with interstitial lung disease. *J Palliat Med*. 2021; 24: 1823-1832.
4. Duck A, Pigram L, Errhalt P, et al. IPF Care: a support program for patients with idiopathic pulmonary fibrosis treated with pirfenidone in Europe. *Adv Ther*. 2015; 32: 87-107.
5. Hoffman M, Mellerick C, Symons K, et al. Pulmonary rehabilitation for interstitial lung disease: referral and patient experiences. *Chron Respir Dis*. 2021; 18: 14799731211046022.
6. Igai Y, Porter SE. Development and applicability of a dignity-centred palliative care programme for people with idiopathic pulmonary fibrosis: a qualitative-driven mixed methods study. *Nurs Open*. 2022; 10: 8-23.
7. Kalluri M, Younus S, Archibald N, et al. Action plans in idiopathic pulmonary fibrosis: a qualitative study—'I do what I can do'. *BMJ Support Palliat Care*. 2021: <http://doi.org/10.1136/bmjspcare-2020-002831>.
8. Khor YH, Saravanan K, Holland AE, et al. A mixed-methods pilot study of handheld fan for breathlessness in interstitial lung disease. *Sci Rep*. 2021; 11: 6874.
9. Lindell KO, Olshansky E, Song M-K, et al. Impact of a disease-management program on symptom burden and health-related quality of life in patients with idiopathic pulmonary fibrosis and their care partners. *Heart Lung*. 2010; 39: 304-313.
10. Lo HYLK, Luo XY, Lau CMJ, et al. Pilot project in developing community rehabilitation service for migrant workers suffering from pneumoconiosis in Mainland China. *Work*. 2007; 30: 33-38.
11. Moor CC, Leuven Slv, Wijisenbeek MS, et al. Feasibility of online home spirometry in systemic sclerosis-associated interstitial lung disease: a pilot study. *Rheumatol*. 2021; 60: 2467-2471.

12. Sharp C, McCabe M, Hussain MJ, et al. Duration of benefit following completion of pulmonary rehabilitation in interstitial lung disease-an observational study. *QJM*. 2017; 110: 17-22.
13. Tikellis G, Lee JYT, Corte TJ, et al. Peer connect service for people with pulmonary fibrosis in Australia: participants' experiences and process evaluation. *Respirology*. 2020; 25: 1053-1059.
