# Supplementary material for: Self-management interventions for people with pulmonary fibrosis: a scoping review
Source: PubMed Central journal article supplement — Eur Respir Rev. 2023 Nov 1;32(170):230092. doi: 10.1183/16000617.0092-2023 (PMC10618910; doi:10.1183/16000617.0092-2023), 2023-11-01
Supplement: ERR-0092-2023.SUPPLEMENT5.pdf [file ERR-0092-2023.SUPPLEMENT5.pdf]

**Supplement 4. Outcome measures used in studies reporting quantitative results**

| <b>Outcome measure</b>                |                                                                             | <b>Number of studies<br/>(total, n=83)<br/>N (%)</b> |
|---------------------------------------|-----------------------------------------------------------------------------|------------------------------------------------------|
| <b>Exercise capacity</b>              |                                                                             |                                                      |
| <b>Clinical exercise tests</b>        | 6-minute walk test                                                          | 50 (60)                                              |
|                                       | Cardiopulmonary exercise test using treadmill/arm ergometry/cycle ergometry |                                                      |
|                                       | - Peak oxygen consumption                                                   | 8 (10)                                               |
|                                       | - Maximal workload                                                          | 8 (10)                                               |
|                                       | Muscle strength and endurance test                                          |                                                      |
|                                       | - Quadriceps                                                                | 7 (8)                                                |
|                                       | - Handgrip                                                                  | 4 (5)                                                |
|                                       | Shuttle walk test                                                           |                                                      |
|                                       | - Incremental                                                               | 6 (7)                                                |
|                                       | - Endurance                                                                 | 1 (1)                                                |
|                                       | 6-minute stepper test                                                       | 3 (4)                                                |
|                                       | 30s chair-stand test                                                        | 3 (4)                                                |
|                                       | Test of 10 chair stands                                                     | 1 (1)                                                |
|                                       | Chair sit-and-reach test                                                    | 1 (1)                                                |
|                                       | Timed 'up and go' test                                                      | 1 (1)                                                |
|                                       | Short Physical Performance Battery                                          | 1 (1)                                                |
| <b>Patient self-reported measures</b> | Barthel index                                                               | 1 (1)                                                |
|                                       | Nagasaki University Respiratory Activities of Daily Living Questionnaire    | 1 (1)                                                |
|                                       | Manchester Respiratory Activities of Daily Living Questionnaire             | 1 (1)                                                |
|                                       | University of Alabama at Birmingham Study of Aging Life-Space Assessment    | 1 (1)                                                |
| <b>Health-related quality of life</b> |                                                                             |                                                      |
| <b>Patient self-reported measures</b> | St George's Respiratory Questionnaire                                       | 31 (37)                                              |
|                                       | Short Form Survey                                                           |                                                      |
|                                       | - 12-item                                                                   | 1 (1)                                                |
|                                       | - 36-item                                                                   | 15 (18)                                              |
|                                       | Chronic Respiratory Disease Questionnaire                                   | 12 (14)                                              |
|                                       | King's Brief Interstitial Lung Disease Questionnaire                        | 5 (6)                                                |
|                                       | EQ-5L-5D Questionnaire                                                      | 2 (2)                                                |
|                                       | Visual Simplified Respiratory Questionnaire                                 | 2 (2)                                                |
|                                       | Maugeri Respiratory Questionnaire                                           | 1 (1)                                                |
|                                       | A Tool to Assess Quality of Life in IPF                                     | 1 (1)                                                |
|                                       | Clinical COPD Questionnaire                                                 | 1 (1)                                                |
| <b>Symptom burden</b>                 |                                                                             |                                                      |
| <b>Patient self-reported measures</b> | Medical Research Council Dyspnoea Scale                                     | 28 (34)                                              |
|                                       | Borg Dyspnoea Scale                                                         | 16 (19)                                              |
|                                       | Baseline/transit dyspnoea index                                             | 6 (7)                                                |

|                                                              |                                                                                                |         |
|--------------------------------------------------------------|------------------------------------------------------------------------------------------------|---------|
|                                                              | University of California San Diego Shortness of Breath Questionnaire                           | 5 (6)   |
|                                                              | Visual Analog Scale (for cough, dyspnoea, fatigue)                                             | 4 (5)   |
|                                                              | Fatigue Assessment Scale                                                                       | 3 (4)   |
|                                                              | Fatigue Severity Scale                                                                         | 2 (2)   |
|                                                              | D-12 Dyspnoea Scale                                                                            | 2 (2)   |
|                                                              | COPD Assessment Test                                                                           | 2 (2)   |
|                                                              | Cough and Sputum Assessment Questionnaire                                                      | 1 (1)   |
|                                                              | Measure Yourself Medical Outcome Profile                                                       | 1 (1)   |
|                                                              | Patient-Reported Outcomes Measurement Information System-29                                    | 1 (1)   |
|                                                              | Pittsburgh Sleep Quality Index                                                                 | 1 (1)   |
| <b>Psychological wellbeing</b>                               |                                                                                                |         |
| <b>Patient self-reported measures</b>                        | Hospital Anxiety and Depression Scale                                                          | 20 (24) |
|                                                              | Patient Health Questionnaire                                                                   | 3 (4)   |
|                                                              | Centre for Epidemiologic Studies-Depression Scale                                              | 3 (4)   |
|                                                              | Perceived Stress Scale                                                                         | 3 (4)   |
|                                                              | General Anxiety Disorder-7 Scale                                                               | 2 (2)   |
|                                                              | Geriatric Depression Scale                                                                     | 2 (2)   |
|                                                              | Beck Anxiety/Depression Inventory                                                              | 1 (1)   |
|                                                              | Psychological General Wellbeing Index                                                          | 1 (1)   |
|                                                              | Profile of Mood State                                                                          | 1 (1)   |
|                                                              | 4-item Patient-Reported Outcomes Measurement Information System Anxiety                        | 1 (1)   |
|                                                              | Rosenberg Self-esteem Scale                                                                    | 1 (1)   |
|                                                              | COVID-19 Fears Questionnaire                                                                   | 1 (1)   |
|                                                              | Multidimensional State Boredom Scale                                                           | 1 (1)   |
|                                                              | University of California Los Angeles Loneliness Scale                                          | 1 (1)   |
| <b>Use of PF-related treatments and medication adherence</b> |                                                                                                |         |
| <b>Review of medical records/<br/>patient self-reported</b>  | Medication adherence (including maintenance and discontinuation rate, time to discontinuation) | 4 (5)   |
|                                                              | Use of opioids                                                                                 | 3 (4)   |
|                                                              | Use of antibiotics                                                                             | 2 (2)   |
|                                                              | Medication adjustments                                                                         | 2 (2)   |
|                                                              | Use of antifibrotic therapy                                                                    | 1 (1)   |
|                                                              | Use of prednisone                                                                              | 1 (1)   |
|                                                              | Use of short-acting bronchodilator inhalers                                                    | 1 (1)   |
| <b>Physical activity</b>                                     |                                                                                                |         |
| <b>Objective measures</b>                                    | Steps/day (using Sensewear armband)                                                            | 4 (5)   |
|                                                              | Total daily energy expenditure                                                                 | 2 (2)   |
|                                                              | Time spent in moderate physical activity (>2.5 - 3 METs)                                       | 3 (4)   |
|                                                              | Time spent in sedentary                                                                        | 1 (1)   |
|                                                              | 7-day pedometer                                                                                | 1 (1)   |

|                                                                  |                                                                |        |
|------------------------------------------------------------------|----------------------------------------------------------------|--------|
|                                                                  | 7-day vector magnitude counts/min                              | 1 (1)  |
| <b>Patient self-reported measures</b>                            | International Physical Activity Questionnaire                  | 3 (4)  |
|                                                                  | Rapid Assessment of Physical Activity Questionnaire            | 1 (1)  |
| <b>Disease knowledge and self-efficacy in disease management</b> |                                                                |        |
| <b>Patient self-reported measures</b>                            | Self-efficacy for Managing Chronic Disease 6-item Scale        | 2 (2)  |
|                                                                  | Rating of control/confidence/preparedness in managing disease  | 2 (2)  |
|                                                                  | Disease knowledge assessment                                   | 2 (2)  |
|                                                                  | COPD Self-efficacy Scale                                       | 1 (1)  |
| <b>Healthcare utilisation</b>                                    |                                                                |        |
| <b>Review of medical records</b>                                 | Hospital admission                                             | 8 (10) |
|                                                                  | Number of outpatient/physician/GP visits                       | 4 (5)  |
|                                                                  | Number of emergency department visits                          | 3 (4)  |
|                                                                  | Time spent in intensive care unit                              | 1 (1)  |
|                                                                  | Referral to allied healthcare support                          | 1 (1)  |
|                                                                  | Pulmonary rehabilitation enrolment                             | 1 (1)  |
|                                                                  | Long term care enrolment                                       | 1 (1)  |
|                                                                  | End-of-life associated costs                                   | 1 (1)  |
| <b>End-of-life planning</b>                                      |                                                                |        |
| <b>Review of medical records</b>                                 | Discussion of advance care plan                                | 4 (5)  |
|                                                                  | Completion of advance directives (including POLST, DNR orders) | 2 (2)  |

IPF: idiopathic pulmonary fibrosis; COPD: chronic obstructive pulmonary disease; MET: metabolic equivalents of task; GP: general practitioner; POLST: Physician Orders for Life Sustaining Treatment; DNR order: do not resuscitate order
