# Supplementary material for: Self-management interventions for people with pulmonary fibrosis: a scoping review
Source: PubMed Central journal article supplement — Eur Respir Rev. 2023 Nov 1;32(170):230092. doi: 10.1183/16000617.0092-2023 (PMC10618910; doi:10.1183/16000617.0092-2023), 2023-11-01
Supplement: ERR-0092-2023.SUPPLEMENT6.pdf [file ERR-0092-2023.SUPPLEMENT6.pdf]

**Supplement 5.1.1. Between-groups mean differences and mean change from baseline within intervention group in RCTs measuring exercise capacity using the 6-minute walk test (6MWT) (n=15)**

| Study                                 | Study design | Type of participants | Setting delivering self-management components | Self-management components delivered                                                                                                                                                                                                                                                                                                                                                                                                                  | Study period | 6-minute walk distance                        |                                                 | Number of participants in intervention group |
|---------------------------------------|--------------|----------------------|-----------------------------------------------|-------------------------------------------------------------------------------------------------------------------------------------------------------------------------------------------------------------------------------------------------------------------------------------------------------------------------------------------------------------------------------------------------------------------------------------------------------|--------------|-----------------------------------------------|-------------------------------------------------|----------------------------------------------|
|                                       |              |                      |                                               |                                                                                                                                                                                                                                                                                                                                                                                                                                                       |              | Between-groups mean difference                | Mean change from baseline in intervention group |                                              |
| Cerdán-de-las-Heras <i>et al.</i> (1) | RCT          | IPF                  | PR, telerehab                                 | <ul style="list-style-type: none"> <li>• Patient education</li> <li>• Home exercise program</li> <li>• Behavioural modification</li> <li>• Managing treatments</li> <li>• Self-monitoring</li> <li>• Managing physical symptoms</li> <li>• Psychosocial support</li> </ul>                                                                                                                                                                            | 12 weeks     | 39.5 *<br>p = 0.03                            | 8.5                                             | 15                                           |
| Dowman <i>et al.</i> (2)              | RCT          | ILD                  | PR, outpatient                                | <ul style="list-style-type: none"> <li>• Patient education</li> <li>• Home exercise program</li> <li>• Behavioural modification</li> <li>• Understanding treatment options</li> <li>• Self-monitoring</li> <li>• Managing disease/comorbidities/ADLs</li> <li>• Managing physical symptoms</li> <li>• Preventing infections/exacerbation</li> <li>• Understanding disease</li> <li>• Psychosocial support</li> <li>• Sexuality/self-esteem</li> </ul> | 8 weeks      | ILD: 25<br>p = 0.03<br>IPF: 31 *<br>p = 0.006 | ILD: 23<br>IPF subgroup:<br>27                  | ILD: 74<br>IPF subgroup:<br>32               |
| Holland <i>et al.</i> (2008) (3)      | RCT          | ILD                  | PR, outpatient                                | <ul style="list-style-type: none"> <li>• Patient education</li> <li>• Home exercise program</li> <li>• Self-monitoring</li> </ul>                                                                                                                                                                                                                                                                                                                     | 8 weeks      | ILD: 35 *<br>p = 0.01                         | ILD: 31.2 *<br>IPF subgroup:<br>25.1            | ILD: 30<br>IPF subgroup:<br>20               |
| Jackson <i>et al.</i> (4)             | RCT          | IPF                  | PR, outpatient                                | <ul style="list-style-type: none"> <li>• Patient education</li> <li>• Home exercise program</li> <li>• Behavioural modification</li> <li>• Understanding treatment options</li> <li>• Managing treatments</li> <li>• Managing physical symptoms</li> <li>• Understanding disease</li> <li>• Psychosocial support</li> </ul>                                                                                                                           | 3 months     | 9.1 (NS)                                      | -6.2                                            | 11                                           |

|                                                                                  |     |             |                                                    |                                                                                                                                                                                                                                                                                                                  |           |                     |        |         |
|----------------------------------------------------------------------------------|-----|-------------|----------------------------------------------------|------------------------------------------------------------------------------------------------------------------------------------------------------------------------------------------------------------------------------------------------------------------------------------------------------------------|-----------|---------------------|--------|---------|
| Jarosch <i>et al.</i> (5)                                                        | RCT | IPF         | PR, inpatient                                      | <ul style="list-style-type: none"> <li>• Patient education</li> <li>• Behavioural modification</li> <li>• Understanding treatment options</li> <li>• Managing disease/comorbidities/ADLs</li> <li>• Managing physical symptoms</li> <li>• Goal setting</li> <li>• Psychosocial support</li> </ul>                | 3 weeks   | 61 *<br>p = 0.006   | 54.7 * | 34      |
| Ku <i>et al.</i> (6)                                                             | RCT | ILD         | PR, outpatient                                     | <ul style="list-style-type: none"> <li>• Patient education</li> <li>• Home exercise program</li> <li>• Behavioural modification</li> <li>• Understanding treatment options</li> <li>• Managing treatments</li> <li>• Self-monitoring</li> <li>• Understanding disease</li> <li>• Psychosocial support</li> </ul> | 8 weeks   | 23.8<br>p = 0.037   | 27     | 20      |
| Naz <i>et al.</i> (7)                                                            | RCT | Sarcoidosis | PR, outpatient                                     | <ul style="list-style-type: none"> <li>• Home exercise program</li> <li>• Self-monitoring</li> <li>• Managing physical symptoms</li> </ul>                                                                                                                                                                       | 12 weeks  | 67.3 *<br>p = 0.009 | 44.3 * | 9       |
| Nishiyama <i>et al.</i> (8)                                                      | RCT | IPF         | PR, outpatient                                     | <ul style="list-style-type: none"> <li>• Patient education</li> </ul>                                                                                                                                                                                                                                            | 10 weeks  | 46.3 *<br>p = <0.01 | 42 *   | 13      |
| Perez-Bogerd <i>et al.</i> (9)                                                   | RCT | ILD         | PR, outpatient                                     | <ul style="list-style-type: none"> <li>• Patient education</li> <li>• Behavioural modification</li> <li>• Managing treatments</li> <li>• Managing disease/comorbidities/ADLs</li> <li>• Psychosocial support</li> </ul>                                                                                          | 6 months  | 72 *<br>p = <0.001  | 49 *   | 30      |
| Prajapat <i>et al.</i> (10)                                                      | RCT | ILD         | PR, outpatient                                     | <ul style="list-style-type: none"> <li>• Patient education</li> <li>• Managing treatments</li> <li>• Managing disease/comorbidities/ADLs</li> <li>• Managing physical symptoms</li> <li>• Understanding disease</li> <li>• Psychosocial support</li> </ul>                                                       | 8 weeks   | 38.2 *<br>p = <0.05 | 54.7 * | 18      |
| Shen <i>et al.</i> (11)                                                          | RCT | IPF         | Breathing exercise training, outpatient/home-based | <ul style="list-style-type: none"> <li>• Home exercise program</li> <li>• Managing physical symptoms</li> </ul>                                                                                                                                                                                                  | 12 months | 55 *<br>p = 0.041   | -27.3  | 30      |
| Vainshelboim <i>et al.</i> (2014) (12)<br>Vainshelboim <i>et al.</i> (2016) (13) | RCT | IPF         | PR, outpatient                                     | <ul style="list-style-type: none"> <li>• Patient education</li> <li>• Home exercise program</li> <li>• Managing physical symptoms</li> </ul>                                                                                                                                                                     | 12 weeks  | 81 *<br>p = <0.001  | 70.4 * | 13w= 15 |

|                         |     |     |                                     |                                                                                                                                                    |          |                    |        |    |
|-------------------------|-----|-----|-------------------------------------|----------------------------------------------------------------------------------------------------------------------------------------------------|----------|--------------------|--------|----|
| Zaki <i>et al.</i> (14) | RCT | ILD | PR with IMT, outpatient             | <ul style="list-style-type: none"> <li>• Behavioural modification</li> <li>• Managing physical symptoms</li> <li>• Psychosocial support</li> </ul> | 8 weeks  | 47.9 *<br>P = 0.01 | 74.6 * | 26 |
| Zhou <i>et al.</i> (15) | RCT | IPF | PR (Daoyin), outpatient/ home-based | <ul style="list-style-type: none"> <li>• Home exercise program</li> <li>• Managing physical symptoms</li> <li>• Psychosocial support</li> </ul>    | 2 months | 48 *<br>p = 0.001  | 60.4 * | 32 |

6MWD: 6-minute walk distance; RCT: randomised controlled trial; IPF: idiopathic pulmonary fibrosis; ILD: interstitial lung disease; PR: pulmonary rehabilitation; IMT: inspiratory muscle training; ADL: activity of daily living.

\* Mean change reached the minimal important difference of 30-33 meters for people with ILD. Positive value indicates improvement (17).

Note: Data reported by a total of 15 out of 16 RCTs that measured exercise capacity with 6-minute walk test are included in this table (one RCT did not report data immediately post-intervention (16). Two RCTs reported the same data (12, 13).

**Supplement 5.1.2. Mean change from baseline within intervention group in non- RCTs measuring exercise capacity using the 6MWT (n=32)**

| Study                              | Study design                   | Type of participants                       | Setting delivering self-management components | Self-management components delivered                                                                                                                                                                                                                                                                                                                                                                              | Study period | Mean change in 6MWD from baseline in intervention group | Number of participants |
|------------------------------------|--------------------------------|--------------------------------------------|-----------------------------------------------|-------------------------------------------------------------------------------------------------------------------------------------------------------------------------------------------------------------------------------------------------------------------------------------------------------------------------------------------------------------------------------------------------------------------|--------------|---------------------------------------------------------|------------------------|
| Arizono <i>et al.</i> (18)         | Pre-post study (prospective)   | IPF                                        | PR, outpatient                                | <ul style="list-style-type: none"> <li>• Patient education</li> </ul>                                                                                                                                                                                                                                                                                                                                             | 10 weeks     | 26.9                                                    | 22                     |
| Brunetti <i>et al.</i> (19)        | Pre-post study (retrospective) | ILD                                        | PR, inpatient                                 | <ul style="list-style-type: none"> <li>• Patient education</li> <li>• Behavioural modification</li> <li>• Psychosocial support</li> </ul>                                                                                                                                                                                                                                                                         | 3-4 weeks    | 52.5 *                                                  | 240                    |
| Chéhère <i>et al.</i> (20)         | Pre-post study (prospective)   | Fibrotic idiopathic interstitial pneumonia | PR, home-based                                | <ul style="list-style-type: none"> <li>• Patient education</li> <li>• Behavioural modification</li> <li>• Understanding treatment options</li> <li>• Managing disease/comorbidities/ADLs</li> <li>• Managing physical symptoms</li> <li>• Preventing infections/exacerbation</li> <li>• Understanding disease</li> <li>• Goal setting</li> <li>• Psychosocial support</li> <li>• Sexuality/self-esteem</li> </ul> | 8 weeks      | 23                                                      | 19                     |
| da Fontoura <i>et al.</i> (21)     | Pre-post study (retrospective) | IPF                                        | PR, outpatient                                | <ul style="list-style-type: none"> <li>• Patient education</li> <li>• Behavioural modification</li> <li>• Managing disease/comorbidities/ADLs</li> <li>• Psychosocial support</li> </ul>                                                                                                                                                                                                                          | 12 weeks     | 58 *                                                    | 31                     |
| Deniz <i>et al.</i> (22)           | Pre-post study (prospective)   | ILD                                        | PR, outpatient                                | <ul style="list-style-type: none"> <li>• Patient education</li> <li>• Managing physical symptoms</li> </ul>                                                                                                                                                                                                                                                                                                       | 8 weeks      | 49.7 *                                                  | 57                     |
| Devani <i>et al.</i> (23)          | Pre-post study (retrospective) | ILD/restrictive disease                    | PR, outpatient                                | <ul style="list-style-type: none"> <li>• Patient education</li> <li>• Behavioural modification</li> <li>• Managing treatments</li> <li>• Managing disease/comorbidities/ADLs</li> <li>• Managing physical symptoms</li> <li>• Preventing infections/exacerbation</li> <li>• Psychosocial support</li> </ul>                                                                                                       | 8 weeks      | 61.8 *                                                  | 100                    |
| Elganady <i>et al.</i> (24)        | Pre-post study (prospective)   | ILD                                        | PR, outpatient                                | <ul style="list-style-type: none"> <li>• Patient education</li> <li>• Managing disease/comorbidities/ADLs</li> <li>• Preventing infections/exacerbation</li> </ul>                                                                                                                                                                                                                                                | 6 weeks      | 132.8 *                                                 | 20                     |
| Ferreira <i>et al.</i> (2006) (25) | Pre-post study (retrospective) | ILD                                        | PR, outpatient                                | <ul style="list-style-type: none"> <li>• Patient education</li> <li>• Psychosocial support</li> </ul>                                                                                                                                                                                                                                                                                                             | 8 weeks      | 39.6 *                                                  | 28                     |

|                                    |                                |             |                              |                                                                                                                                                                                                                                                                                                             |                                                |                                     |                                   |
|------------------------------------|--------------------------------|-------------|------------------------------|-------------------------------------------------------------------------------------------------------------------------------------------------------------------------------------------------------------------------------------------------------------------------------------------------------------|------------------------------------------------|-------------------------------------|-----------------------------------|
| Ferreira <i>et al.</i> (2009) (26) | Pre-post study (retrospective) | ILD         | PR, outpatient               | <ul style="list-style-type: none"> <li>• Patient education</li> <li>• Behavioural modification</li> <li>• Managing treatments</li> <li>• Managing disease/comorbidities/ADLs</li> <li>• Managing physical symptoms</li> <li>• Psychosocial support</li> <li>• Palliation and EOL planning</li> </ul>        | 6-8 weeks                                      | 56 *                                | 99                                |
| Fuschillo <i>et al.</i> (27)       | Pre-post study (retrospective) | ILD         | PR, inpatient                | <ul style="list-style-type: none"> <li>• Patient education</li> <li>• Behavioural modification</li> <li>• Understanding treatment options</li> <li>• Managing treatments</li> <li>• Managing physical symptoms</li> </ul>                                                                                   | 4-6 weeks                                      | 68.5 *                              | 38                                |
| Grongstad <i>et al.</i> (28)       | Pre-post study (prospective)   | Sarcoidosis | PR, inpatient                | <ul style="list-style-type: none"> <li>• Patient education</li> <li>• Behavioural modification</li> <li>• Understanding treatment options</li> <li>• Managing disease/comorbidities/ADLs</li> <li>• Understanding disease</li> <li>• Psychosocial support</li> </ul>                                        | 4 weeks                                        | 27                                  | 41                                |
| Guler <i>et al.</i> (29)           | Cohort                         | ILD         | PR, outpatient/<br>inpatient | <ul style="list-style-type: none"> <li>• Patient education</li> <li>• Behavioural modification</li> <li>• Managing treatments</li> <li>• Managing disease/comorbidities/ADLs</li> <li>• Managing physical symptoms</li> <li>• Understanding disease</li> <li>• Psychosocial support</li> </ul>              | Outpatient: 6-12 weeks<br>Inpatient: 2-4 weeks | Inpatient: 55 *<br>Outpatient: 34 * | Inpatient: 196<br>Outpatient: 505 |
| Holland <i>et al.</i> (2012) (30)  | Pre-post study (prospective)   | ILD         | PR, outpatient               | <ul style="list-style-type: none"> <li>• Patient education</li> <li>• Home exercise program</li> <li>• Self-monitoring</li> </ul>                                                                                                                                                                           | 8 weeks                                        | ILD: 43 *<br>IPF: 21                | Whole cohort: 42                  |
| Huppmann <i>et al.</i> (31)        | Pre-post study (prospective)   | ILD         | PR, inpatient                | <ul style="list-style-type: none"> <li>• Patient education</li> <li>• Behavioural modification</li> <li>• Managing treatments</li> <li>• Managing disease/comorbidities/ADLs</li> <li>• Managing physical symptoms</li> <li>• Preventing infections/exacerbation</li> <li>• Psychosocial support</li> </ul> | 30 (1) days                                    | 46 *                                | 369                               |

|                             |                                 |                       |                          |                                                                                                                                                                                                                                                                                                                                                                                     |            |                                    |                                 |
|-----------------------------|---------------------------------|-----------------------|--------------------------|-------------------------------------------------------------------------------------------------------------------------------------------------------------------------------------------------------------------------------------------------------------------------------------------------------------------------------------------------------------------------------------|------------|------------------------------------|---------------------------------|
| Igarashi <i>et al.</i> (32) | Non-randomised controlled study | ILD                   | PR, outpatient           | <ul style="list-style-type: none"> <li>• Patient education</li> <li>• Home exercise program</li> <li>• Behavioural modification</li> <li>• Self-monitoring</li> <li>• Managing physical symptoms</li> <li>• Preventing infections/exacerbation</li> <li>• Understanding disease</li> <li>• Psychosocial support</li> </ul>                                                          | 3 months   | 15                                 | 13                              |
| Kerti <i>et al.</i> (33)    | Pre-post study (prospective)    | ILD                   | PR, inpatient            | <ul style="list-style-type: none"> <li>• Managing physical symptoms</li> </ul>                                                                                                                                                                                                                                                                                                      | 4 weeks    | ILD: 33 *<br>IPF: 47 *             | ILD: 30<br>IPF: 23              |
| Keyser <i>et al.</i> (34)   | Pre-post study (prospective)    | ILD                   | PR, outpatient           | <ul style="list-style-type: none"> <li>• Patient education</li> <li>• Behavioural modification</li> <li>• Managing treatments</li> <li>• Managing disease/comorbidities/ADLs</li> <li>• Managing physical symptoms</li> <li>• Preventing infections/exacerbation</li> <li>• Understanding disease</li> <li>• Psychosocial support</li> <li>• Palliation and EOL planning</li> </ul> | 10 weeks   | 52 *                               | 13                              |
| Kozu <i>et al.</i> (35)     | Pre-post study (prospective)    | IPF                   | PR, outpatient           | <ul style="list-style-type: none"> <li>• Patient education</li> <li>• Home exercise program</li> <li>• Behavioural modification</li> <li>• Self-monitoring</li> <li>• Managing disease/comorbidities/ADLs</li> <li>• Managing physical symptoms</li> <li>• Preventing infections/exacerbation</li> </ul>                                                                            | 8 weeks    | 16.2                               | 36                              |
| Lingner <i>et al.</i> (36)  | Pre-post study (prospective)    | Sarcoidosis           | PR, inpatient            | <ul style="list-style-type: none"> <li>• Patient education</li> <li>• Behavioural modification</li> <li>• Understanding treatment options</li> <li>• Managing disease/comorbidities/ADLs</li> <li>• Managing physical symptoms</li> <li>• Psychosocial support</li> </ul>                                                                                                           | 3 weeks    | 39.8 *                             | 262                             |
| Matsuo <i>et al.</i> (37)   | Pre-post study (retrospective)  | ILD                   | PR, outpatient/inpatient | <ul style="list-style-type: none"> <li>• Managing physical symptoms</li> </ul>                                                                                                                                                                                                                                                                                                      | 6-10 weeks | 5.5                                | 28                              |
| Nasrat <i>et al.</i> (38)   | Non-randomised controlled study | ILD                   | PR with IMT, outpatient  | <ul style="list-style-type: none"> <li>• Managing physical symptoms</li> </ul>                                                                                                                                                                                                                                                                                                      | 8 weeks    | 68 *                               | 30                              |
| Ochmann <i>et al.</i> (39)  | Longitudinal                    | Silicosis, asbestosis | PR, inpatient            | <ul style="list-style-type: none"> <li>• Behavioural modification</li> <li>• Managing physical symptoms</li> </ul>                                                                                                                                                                                                                                                                  | 4 weeks    | Silicosis: 19.6<br>Asbestosis: 2.9 | Silicosis: 42<br>Asbestosis: 66 |

|                             |                                 |     |                |                                                                                                                                                                                                                                                                                                                                                                                                                                |                |                                         |                                   |
|-----------------------------|---------------------------------|-----|----------------|--------------------------------------------------------------------------------------------------------------------------------------------------------------------------------------------------------------------------------------------------------------------------------------------------------------------------------------------------------------------------------------------------------------------------------|----------------|-----------------------------------------|-----------------------------------|
| Ozalevli <i>et al.</i> (40) | Pre-post study (prospective)    | IPF | PR, home-based | <ul style="list-style-type: none"> <li>• Home exercise program</li> <li>• Managing physical symptoms</li> </ul>                                                                                                                                                                                                                                                                                                                | 12 weeks       | 40.2 *                                  | 15                                |
| Rammaert <i>et al.</i> (41) | Pre-post study (prospective)    | IPF | PR, home-based | <ul style="list-style-type: none"> <li>• Patient education</li> <li>• Home exercise program</li> <li>• Self-monitoring</li> </ul>                                                                                                                                                                                                                                                                                              | 8 weeks        | -8                                      | 13                                |
| Rifaat <i>et al.</i> (42)   | Pre-post study (prospective)    | IPF | PR, outpatient | <ul style="list-style-type: none"> <li>• Patient education</li> <li>• Managing physical symptoms</li> <li>• Psychosocial support</li> </ul>                                                                                                                                                                                                                                                                                    | 8 weeks        | 60.6 *                                  | 30                                |
| Ryerson <i>et al.</i> (43)  | Cohort                          | ILD | PR, outpatient | <ul style="list-style-type: none"> <li>• Patient education</li> <li>• Home exercise program</li> <li>• Managing treatments</li> </ul>                                                                                                                                                                                                                                                                                          | 6-9 weeks      | 57.6 *                                  | 54                                |
| Salhi <i>et al.</i> (44)    | Pre-post study (retrospective)  | ILD | PR, outpatient | <ul style="list-style-type: none"> <li>• Patient education</li> <li>• Behavioural modification</li> <li>• Understanding treatment options</li> <li>• Managing treatments</li> <li>• Managing disease/comorbidities/ADLs</li> <li>• Understanding disease</li> <li>• Psychosocial support</li> </ul>                                                                                                                            | 12 or 24 weeks | 12 weeks PR: 79 *<br>24 weeks PR: 102 * | 12weeks PR : 11<br>24weeks PR: 10 |
| Sanchez-Ramirez (45)        | Pre-post study (retrospective)  | ILD | PR, outpatient | <ul style="list-style-type: none"> <li>• Patient education</li> <li>• Behavioural modification</li> <li>• Understanding treatment options</li> <li>• Managing treatments</li> <li>• Managing disease/comorbidities/ADLs</li> <li>• Managing physical symptoms</li> <li>• Preventing infections/exacerbation</li> <li>• Understanding disease</li> <li>• Psychosocial support</li> <li>• Palliation and EOL planning</li> </ul> | 8 weeks        | 45.1 *                                  | 127                               |
| Sciriha <i>et al.</i> (46)  | Non-randomised controlled study | ILD | PR, outpatient | <ul style="list-style-type: none"> <li>• Patient education</li> <li>• Home exercise program</li> <li>• Managing treatments</li> <li>• Self-monitoring</li> </ul>                                                                                                                                                                                                                                                               | 12 weeks       | 52.04 *                                 | 60                                |
| Swigris <i>et al.</i> (47)  | Pre-post study (prospective)    | IPF | PR, outpatient | <ul style="list-style-type: none"> <li>• Patient education</li> <li>• Behavioural modification</li> <li>• Managing treatments</li> <li>• Managing disease/comorbidities/ADLs</li> <li>• Managing physical symptoms</li> <li>• Psychosocial support</li> <li>• Palliation and EOL planning</li> </ul>                                                                                                                           | 6-8 weeks      | 61.6 *                                  | 8                                 |

|                            |                                |                |                                               |                                                                                                                                                                                                                                                                                                                                                                               |                                                                             |                              |                       |
|----------------------------|--------------------------------|----------------|-----------------------------------------------|-------------------------------------------------------------------------------------------------------------------------------------------------------------------------------------------------------------------------------------------------------------------------------------------------------------------------------------------------------------------------------|-----------------------------------------------------------------------------|------------------------------|-----------------------|
| Tonelli <i>et al.</i> (48) | Pre-post study (prospective)   | ILD            | PR, outpatient/inpatient                      | <ul style="list-style-type: none"> <li>• Patient education</li> <li>• Behavioural modification</li> <li>• Managing treatments</li> <li>• Managing disease/comorbidities/ADLs</li> <li>• Managing physical symptoms</li> <li>• Psychosocial support</li> <li>• Palliation and EOL planning</li> </ul>                                                                          | >24 sessions (6 days/week for 1 <sup>st</sup> week; twice daily thereafter) | 54.1 *                       | 39                    |
| Tsang <i>et al.</i> (49)   | Pre-post study (retrospective) | Pneumoconiosis | PR, community-based (CBRP)/ home-based (HBRP) | <ul style="list-style-type: none"> <li>• Patient education</li> <li>• Home exercise program</li> <li>• Behavioural modification</li> <li>• Managing treatments</li> <li>• Managing disease/comorbidities/ADLs</li> <li>• Managing physical symptoms</li> <li>• Preventing infections/exacerbation</li> <li>• Understanding disease</li> <li>• Psychosocial support</li> </ul> | CBRP: 4-6 weeks<br>HBRP: 8 home visits                                      | CBRP: 59.5 *<br>HBRP: 47.6 * | CBRP: 155<br>HBRP: 26 |

RCT: randomised controlled trial; 6MWT: 6-minute walk test; 6MWD: 6-minute walk distance; IPF: idiopathic pulmonary fibrosis; ILD: interstitial lung disease; PR: pulmonary rehabilitation; IMT: inspiratory muscle training; ADL: activity of daily living; EOL: end-of-life.

\* Mean change reached the minimal important difference of 30-33 meters for people with ILD. Positive value indicates improvement (17).

Note: Data reported by a total of 32 out of 34 studies that measured exercise capacity with 6-minute walk test are included in this table (one pre-post study did not report data (50); one pre-post study did not report data immediately post-intervention (51)).



**Supplement 5.2.1. Between-groups mean differences and mean change from baseline within intervention group in RCTs measuring health-related quality of life with St. George's Respiratory Questionnaire (SGRQ) total score (n=14)**

| Study                                 | Study design                     | Type of participants | Setting delivering self-management components          | Self-management components delivered                                                                                                                                                                                                                                                                                                                                                                                                                  | Study period | SGRQ total scores                                       |                                                 | Number of participants in intervention group |
|---------------------------------------|----------------------------------|----------------------|--------------------------------------------------------|-------------------------------------------------------------------------------------------------------------------------------------------------------------------------------------------------------------------------------------------------------------------------------------------------------------------------------------------------------------------------------------------------------------------------------------------------------|--------------|---------------------------------------------------------|-------------------------------------------------|----------------------------------------------|
|                                       |                                  |                      |                                                        |                                                                                                                                                                                                                                                                                                                                                                                                                                                       |              | Between-groups mean difference                          | Mean change from baseline in intervention group |                                              |
| Bajwah <i>et al.</i> (52)             | Mixed methods: RCT & qualitative | IPF                  | Hospital2Home program with case conference, home-based | <ul style="list-style-type: none"> <li>• Patient education</li> <li>• Managing physical symptoms</li> <li>• Preventing infections/exacerbation</li> <li>• Goal setting</li> <li>• Psychosocial support</li> <li>• Palliation and EOL planning</li> </ul>                                                                                                                                                                                              | 2 months     | Data not reported for 2m                                | At 8w: -4.3                                     | 22                                           |
| Cerdán-de-las-Heras <i>et al.</i> (1) | RCT                              | IPF                  | PR, telerehab                                          | <ul style="list-style-type: none"> <li>• Patient education</li> <li>• Home exercise program</li> <li>• Behavioural modification</li> <li>• Managing treatments</li> <li>• Self-monitoring</li> <li>• Managing physical symptoms</li> <li>• Psychosocial support</li> </ul>                                                                                                                                                                            | 12 weeks     | Data not reported (NS)                                  | 1.4                                             | 15                                           |
| Dowman <i>et al.</i> (2)              | RCT                              | ILD                  | PR, outpatient                                         | <ul style="list-style-type: none"> <li>• Patient education</li> <li>• Home exercise program</li> <li>• Behavioural modification</li> <li>• Understanding treatment options</li> <li>• Self-monitoring</li> <li>• Managing disease/comorbidities/ADLs</li> <li>• Managing physical symptoms</li> <li>• Preventing infections/exacerbation</li> <li>• Understanding disease</li> <li>• Psychosocial support</li> <li>• Sexuality/self-esteem</li> </ul> | 8 weeks      | ILD: -5.8<br>p = 0.04<br>IPF subgroup: -5.7<br>p = 0.01 | ILD: -4.8<br>IPF subgroup: -3                   | ILD: 74<br>IPF subgroup: 32                  |

|                                                                                  |     |             |                                                     |                                                                                                                                                                                                                                                                                                                             |           |                      |         |         |
|----------------------------------------------------------------------------------|-----|-------------|-----------------------------------------------------|-----------------------------------------------------------------------------------------------------------------------------------------------------------------------------------------------------------------------------------------------------------------------------------------------------------------------------|-----------|----------------------|---------|---------|
| Gaunaurd <i>et al.</i> (53)                                                      | RCT | IPF         | PR, outpatient                                      | <ul style="list-style-type: none"> <li>• Patient education</li> <li>• Home exercise program</li> <li>• Behavioural modification</li> <li>• Understanding treatment options</li> <li>• Managing treatments</li> <li>• Managing physical symptoms</li> <li>• Understanding disease</li> <li>• Psychosocial support</li> </ul> | 3 months  | -6.8 (NS)            | -4.1    | 11      |
| Janssen <i>et al.</i> (54)                                                       | RCT | IPF         | Palliative care program, outpatient                 | <ul style="list-style-type: none"> <li>• Managing physical symptoms</li> <li>• Understanding disease</li> <li>• Goal setting</li> <li>• Psychosocial support</li> <li>• Palliation and EOL planning</li> </ul>                                                                                                              | 6 months  | 3.7 (NS)             | 3.8     | 9       |
| Ku <i>et al.</i> (6)                                                             | RCT | ILD         | PR, outpatient                                      | <ul style="list-style-type: none"> <li>• Patient education</li> <li>• Home exercise program</li> <li>• Behavioural modification</li> <li>• Understanding treatment options</li> <li>• Managing treatments</li> <li>• Self-monitoring</li> <li>• Understanding disease</li> <li>• Psychosocial support</li> </ul>            | 8 weeks   | -8.8 *<br>p = 0.03   | -8.9 *  | 20      |
| Naz <i>et al.</i> (7)                                                            | RCT | Sarcoidosis | PR, outpatient                                      | <ul style="list-style-type: none"> <li>• Home exercise program</li> <li>• Self-monitoring</li> <li>• Managing physical symptoms</li> </ul>                                                                                                                                                                                  | 12 weeks  | -7.3 *<br>p = 0.048  | -14.3 * | 9       |
| Nishiyama <i>et al.</i> (8)                                                      | RCT | IPF         | PR, outpatient                                      | <ul style="list-style-type: none"> <li>• Patient education</li> </ul>                                                                                                                                                                                                                                                       | 10 weeks  | -6.1<br>p = <0.05    | -2.9    | 13      |
| Perez-Bogerd <i>et al.</i> (9)                                                   | RCT | ILD         | PR, outpatient                                      | <ul style="list-style-type: none"> <li>• Patient education</li> <li>• Behavioural modification</li> <li>• Managing treatments</li> <li>• Managing disease/comorbidities/ADLs</li> <li>• Psychosocial support</li> </ul>                                                                                                     | 6 months  | -12 *<br>p <0.001    | -7 *    | 30      |
| Shen <i>et al.</i> (11)                                                          | RCT | IPF         | Breathing exercise training, outpatient/ home-based | <ul style="list-style-type: none"> <li>• Home exercise program</li> <li>• Managing physical symptoms</li> </ul>                                                                                                                                                                                                             | 12 months | -8.5 *<br>p = 0.003  | -3.7    | 30      |
| Vainshelboim <i>et al.</i> (2014) (12)<br>Vainshelboim <i>et al.</i> (2016) (13) | RCT | IPF         | PR, outpatient                                      | <ul style="list-style-type: none"> <li>• Patient education</li> <li>• Home exercise program</li> <li>• Managing physical symptoms</li> </ul>                                                                                                                                                                                | 12 weeks  | -9.7 *<br>p = <0.001 | -6.9    | 13w= 15 |

|                         |     |     |                                     |                                                                                                                                                    |          |                      |         |    |
|-------------------------|-----|-----|-------------------------------------|----------------------------------------------------------------------------------------------------------------------------------------------------|----------|----------------------|---------|----|
| Zaki <i>et al.</i> (14) | RCT | ILD | PR with IMT, outpatient             | <ul style="list-style-type: none"> <li>• Behavioural modification</li> <li>• Managing physical symptoms</li> <li>• Psychosocial support</li> </ul> | 8 weeks  | -4<br>p = 0.038      | -13.2 * | 26 |
| Zhou <i>et al.</i> (15) | RCT | IPF | PR (Daoyin), outpatient/ home-based | <ul style="list-style-type: none"> <li>• Home exercise program</li> <li>• Managing physical symptoms</li> <li>• Psychosocial support</li> </ul>    | 2 months | -13.6 *<br>p = 0.005 | -18.4 * | 32 |

RCT: randomised controlled trial; IPF: idiopathic pulmonary fibrosis; ILD: interstitial lung disease; PR: pulmonary rehabilitation; IMT: inspiratory muscle training; ADL: activity of daily living; EOL: end-of-life.

\* Mean change reached the minimal important difference of 7 units for people with ILD and IPF. Negative value indicates improvement (55).

Note: Data reported by a total of 14 out of 15 RCTs that measured health-related quality of life with St. George's Respiratory Questionnaire are included in this table (one RCT did not report data immediately post-intervention (16). Two RCTs reported the same data (12, 13).

**Supplement 5.2.2. Mean change from baseline within intervention group in non-RCTs measuring health-related quality of life with SGRQ total score (n=15)**

| Study                       | Study design                                              | Type of participants | Setting delivering self-management components                  | Self-management components delivered                                                                                                                                                                                                                                                                                                                                                                                                                                                       | Study period | Mean change in SGRQ total score from baseline in intervention group | Number of participants |
|-----------------------------|-----------------------------------------------------------|----------------------|----------------------------------------------------------------|--------------------------------------------------------------------------------------------------------------------------------------------------------------------------------------------------------------------------------------------------------------------------------------------------------------------------------------------------------------------------------------------------------------------------------------------------------------------------------------------|--------------|---------------------------------------------------------------------|------------------------|
| Arizono <i>et al.</i> (18)  | Pre-post study (prospective)                              | IPF                  | PR, outpatient                                                 | <ul style="list-style-type: none"> <li>• Patient education</li> </ul>                                                                                                                                                                                                                                                                                                                                                                                                                      | 10 weeks     | -3.8                                                                | 22                     |
| Deniz <i>et al.</i> (22)    | Pre-post study (prospective)                              | ILD                  | PR, outpatient                                                 | <ul style="list-style-type: none"> <li>• Patient education</li> <li>• Managing physical symptoms</li> </ul>                                                                                                                                                                                                                                                                                                                                                                                | 8 weeks      | -7.6 *                                                              | 57                     |
| Elganady <i>et al.</i> (24) | Pre-post study (prospective)                              | ILD                  | PR, outpatient                                                 | <ul style="list-style-type: none"> <li>• Patient education</li> <li>• Managing disease/comorbidities/ADLs</li> <li>• Preventing infections/exacerbation</li> </ul>                                                                                                                                                                                                                                                                                                                         | 6 weeks      | -24.3 *                                                             | 20                     |
| Igai <i>et al.</i> (56)     | Mixed methods: pre-post study (prospective) + qualitative | IPF                  | Dignity-centred palliative care program, outpatient/home-based | <ul style="list-style-type: none"> <li>• Patient education</li> <li>• Behavioural modification</li> <li>• Understanding treatment options</li> <li>• Managing treatments</li> <li>• Self-monitoring</li> <li>• Managing disease/comorbidities/ADLs</li> <li>• Managing physical symptoms</li> <li>• Preventing infections/exacerbation</li> <li>• Understanding disease</li> <li>• Psychosocial support</li> <li>• Sexuality/self-esteem</li> <li>• Palliation and EOL planning</li> </ul> | 45 days      | -5.5                                                                | 12                     |
| Igarashi <i>et al.</i> (32) | Non-randomised controlled study                           | ILD                  | PR, outpatient                                                 | <ul style="list-style-type: none"> <li>• Patient education</li> <li>• Home exercise program</li> <li>• Behavioural modification</li> <li>• Self-monitoring</li> <li>• Managing physical symptoms</li> <li>• Preventing infections/exacerbation</li> <li>• Understanding disease</li> <li>• Psychosocial support</li> </ul>                                                                                                                                                                 | 3 months     | 6.8                                                                 | 13                     |
| Kaymaz <i>et al.</i> (57)   | Pre-post study (retrospective)                            | ILD                  | PR, outpatient                                                 | <ul style="list-style-type: none"> <li>• Patient education</li> <li>• Home exercise program</li> <li>• Behavioural modification</li> <li>• Managing disease/comorbidities/ADLs</li> <li>• Managing physical symptoms</li> <li>• Understanding disease</li> <li>• Psychosocial support</li> </ul>                                                                                                                                                                                           | 8 weeks      | -10.1 *                                                             | 10                     |

|                            |                                 |                       |                          |                                                                                                                                                                                                                                                                                                                                                                                                                                |            |                                    |                                 |
|----------------------------|---------------------------------|-----------------------|--------------------------|--------------------------------------------------------------------------------------------------------------------------------------------------------------------------------------------------------------------------------------------------------------------------------------------------------------------------------------------------------------------------------------------------------------------------------|------------|------------------------------------|---------------------------------|
| Lingner <i>et al.</i> (36) | Pre-post study (prospective)    | Sarcoidosis           | PR, inpatient            | <ul style="list-style-type: none"> <li>• Patient education</li> <li>• Behavioural modification</li> <li>• Understanding treatment options</li> <li>• Managing disease/comorbidities/ADLs</li> <li>• Managing physical symptoms</li> <li>• Psychosocial support</li> </ul>                                                                                                                                                      | 3 weeks    | -6.7                               | 296                             |
| Matsuo <i>et al.</i> (37)  | Pre-post study (retrospective)  | ILD                   | PR, outpatient/inpatient | <ul style="list-style-type: none"> <li>• Managing physical symptoms</li> </ul>                                                                                                                                                                                                                                                                                                                                                 | 6-10 weeks | -1.6                               | 28                              |
| Naji <i>et al.</i> (58)    | Pre-post study (retrospective)  | ILD                   | PR, outpatient/inpatient | <ul style="list-style-type: none"> <li>• Patient education</li> <li>• Home exercise program</li> <li>• Behavioural modification</li> <li>• Managing treatments</li> <li>• Self-monitoring</li> <li>• Managing physical symptoms</li> </ul>                                                                                                                                                                                     | 8 weeks    | -13.7 *                            | 26                              |
| Ochmann <i>et al.</i> (39) | Longitudinal                    | Silicosis, asbestosis | PR, inpatient            | <ul style="list-style-type: none"> <li>• Behavioural modification</li> <li>• Managing physical symptoms</li> </ul>                                                                                                                                                                                                                                                                                                             | 4 weeks    | Silicosis: 0.2<br>Asbestosis: -1.1 | Silicosis: 42<br>Asbestosis: 66 |
| Rifaat <i>et al.</i> (42)  | Pre-post study (prospective)    | IPF                   | PR, outpatient           | <ul style="list-style-type: none"> <li>• Patient education</li> <li>• Managing physical symptoms</li> <li>• Psychosocial support</li> </ul>                                                                                                                                                                                                                                                                                    | 8 weeks    | -34.8 *                            | 30                              |
| Ryerson <i>et al.</i> (43) | Cohort                          | ILD                   | PR, outpatient           | <ul style="list-style-type: none"> <li>• Patient education</li> <li>• Home exercise program</li> <li>• Managing treatments</li> </ul>                                                                                                                                                                                                                                                                                          | 6-9 weeks  | -6.1                               | 54                              |
| Sanchez-Ramirez (45)       | Pre-post study (retrospective)  | ILD                   | PR, outpatient           | <ul style="list-style-type: none"> <li>• Patient education</li> <li>• Behavioural modification</li> <li>• Understanding treatment options</li> <li>• Managing treatments</li> <li>• Managing disease/comorbidities/ADLs</li> <li>• Managing physical symptoms</li> <li>• Preventing infections/exacerbation</li> <li>• Understanding disease</li> <li>• Psychosocial support</li> <li>• Palliation and EOL planning</li> </ul> | 8 weeks    | -5.8                               | 127                             |
| Sciriha <i>et al.</i> (46) | Non-randomised controlled study | ILD                   | PR, outpatient           | <ul style="list-style-type: none"> <li>• Patient education</li> <li>• Home exercise program</li> <li>• Managing treatments</li> <li>• Self-monitoring</li> </ul>                                                                                                                                                                                                                                                               | 12 weeks   | -5.5                               | 60                              |

|                               |                                 |     |                              |                                                                                                                                                                                                                                                                                                      |                                                                                     |         |    |
|-------------------------------|---------------------------------|-----|------------------------------|------------------------------------------------------------------------------------------------------------------------------------------------------------------------------------------------------------------------------------------------------------------------------------------------------|-------------------------------------------------------------------------------------|---------|----|
| Tonelli <i>et al.</i><br>(48) | Pre-post study<br>(prospective) | ILD | PR, outpatient/<br>inpatient | <ul style="list-style-type: none"> <li>• Patient education</li> <li>• Behavioural modification</li> <li>• Managing treatments</li> <li>• Managing disease/comorbidities/ADLs</li> <li>• Managing physical symptoms</li> <li>• Psychosocial support</li> <li>• Palliation and EOL planning</li> </ul> | >24 sessions<br>(6days/week for<br>1 <sup>st</sup> week; twice<br>daily thereafter) | -12.1 * | 39 |
|-------------------------------|---------------------------------|-----|------------------------------|------------------------------------------------------------------------------------------------------------------------------------------------------------------------------------------------------------------------------------------------------------------------------------------------------|-------------------------------------------------------------------------------------|---------|----|

RCT: randomised controlled trial; SGRQ: St. George's Respiratory Questionnaire; IPF: idiopathic pulmonary fibrosis; ILD: interstitial lung disease; PR: pulmonary rehabilitation; ADL: activity of daily living; EOL: end-of-life.

\* Mean change reached the minimal important difference of 7 units for people with ILD and IPF. Negative value indicates improvement (55).

Note: Data reported by a total of 15 out of 16 studies that measured health-related quality of life with St. George's Respiratory Questionnaire are included in this table (one pre-post study did not report data) (41).

**Supplement 5.3.1. Between-groups mean differences and mean change from baseline within intervention group in RCTs measuring symptom burden with the Medical Research Council (MRC) Dyspnoea scale (n=9)**

| Study                            | Study design                     | Type of participants | Setting delivering self-management components          | Self-management components delivered                                                                                                                                                                                                                                                                                                                                                                                                                  | Study period | MRC Dyspnoea scores                                      |                                                 | Number of participants in intervention group |
|----------------------------------|----------------------------------|----------------------|--------------------------------------------------------|-------------------------------------------------------------------------------------------------------------------------------------------------------------------------------------------------------------------------------------------------------------------------------------------------------------------------------------------------------------------------------------------------------------------------------------------------------|--------------|----------------------------------------------------------|-------------------------------------------------|----------------------------------------------|
|                                  |                                  |                      |                                                        |                                                                                                                                                                                                                                                                                                                                                                                                                                                       |              | Between-groups mean difference                           | Mean change from baseline in intervention group |                                              |
| Bajwah <i>et al.</i> (52)        | Mixed methods: RCT & qualitative | IPF                  | Hospital2Home program with case conference, home-based | <ul style="list-style-type: none"> <li>• Patient education</li> <li>• Managing physical symptoms</li> <li>• Preventing infections/exacerbation</li> <li>• Goal setting</li> <li>• Psychosocial support</li> <li>• Palliation and EOL planning</li> </ul>                                                                                                                                                                                              | 8 weeks      | -0.3 (NS)                                                | At 4w: 0                                        | 23                                           |
| Dowman <i>et al.</i> (2)         | RCT                              | ILD                  | PR, outpatient                                         | <ul style="list-style-type: none"> <li>• Patient education</li> <li>• Home exercise program</li> <li>• Behavioural modification</li> <li>• Understanding treatment options</li> <li>• Self-monitoring</li> <li>• Managing disease/comorbidities/ADLs</li> <li>• Managing physical symptoms</li> <li>• Preventing infections/exacerbation</li> <li>• Understanding disease</li> <li>• Psychosocial support</li> <li>• Sexuality/self-esteem</li> </ul> | 8 weeks      | ILD: -0.3<br>p = 0.06<br>IPF subgroup: 0.009<br>p = 0.03 | ILD: -0.3<br>IPF subgroup: 0.009                | ILD: 74<br>IPF subgroup: 32                  |
| Holland <i>et al.</i> (2008) (3) | RCT                              | ILD                  | PR, outpatient                                         | <ul style="list-style-type: none"> <li>• Patient education</li> <li>• Home exercise program</li> <li>• Self-monitoring</li> </ul>                                                                                                                                                                                                                                                                                                                     | 8 weeks      | ILD: -0.7 *<br>p = 0.04                                  | ILD: -0.6 *<br>IPF subgroup: -0.6 *             | ILD: 30<br>IPF subgroup: 20                  |
| Naz <i>et al.</i> (7)            | RCT                              | Sarcoidosis          | PR, outpatient                                         | <ul style="list-style-type: none"> <li>• Home exercise program</li> <li>• Self-monitoring</li> <li>• Managing physical symptoms</li> </ul>                                                                                                                                                                                                                                                                                                            | 12 weeks     | -0.8 *<br>p = 0.001                                      | -0.8 *                                          | 9                                            |
| Perez-Bogerd <i>et al.</i> (9)   | RCT                              | ILD                  | PR, outpatient                                         | <ul style="list-style-type: none"> <li>• Patient education</li> <li>• Behavioural modification</li> <li>• Managing treatments</li> <li>• Managing disease/comorbidities/ADLs</li> <li>• Psychosocial support</li> </ul>                                                                                                                                                                                                                               | 6 months     | 0.3 (NS)                                                 | 0.1                                             | 30                                           |

|                                                                                  |     |             |                                     |                                                                                                                                                                                                                                                                                                                                                                                                                   |          |                          |        |    |
|----------------------------------------------------------------------------------|-----|-------------|-------------------------------------|-------------------------------------------------------------------------------------------------------------------------------------------------------------------------------------------------------------------------------------------------------------------------------------------------------------------------------------------------------------------------------------------------------------------|----------|--------------------------|--------|----|
| Vainshelboim <i>et al.</i> (2014) (12)<br>Vainshelboim <i>et al.</i> (2016) (13) | RCT | IPF         | PR, outpatient                      | <ul style="list-style-type: none"> <li>• Patient education</li> <li>• Home exercise program</li> <li>• Managing physical symptoms</li> </ul>                                                                                                                                                                                                                                                                      | 12 weeks | -1.1 *<br>p = <0.001     | -0.7 * | 15 |
| Wallaert <i>et al.</i> (2020) (59)                                               | RCT | Sarcoidosis | PR, outpatient                      | <ul style="list-style-type: none"> <li>• Patient education</li> <li>• Behavioural modification</li> <li>• Understanding treatment options</li> <li>• Managing disease/comorbidities/ADLs</li> <li>• Managing physical symptoms</li> <li>• Preventing infections/exacerbation</li> <li>• Understanding disease</li> <li>• Goal setting</li> <li>• Psychosocial support</li> <li>• Sexuality/self-esteem</li> </ul> | 2 months | Data not reported for 2m | -0.7 * | 18 |
| Zaki <i>et al.</i> (14)                                                          | RCT | ILD         | PR with IMT, outpatient             | <ul style="list-style-type: none"> <li>• Behavioural modification</li> <li>• Managing physical symptoms</li> <li>• Psychosocial support</li> </ul>                                                                                                                                                                                                                                                                | 8 weeks  | -1 *<br>p = <0.001       | -2 *   | 26 |
| Zhou <i>et al.</i> (15)                                                          | RCT | IPF         | PR (Daoyin), outpatient/ home-based | <ul style="list-style-type: none"> <li>• Home exercise program</li> <li>• Managing physical symptoms</li> <li>• Psychosocial support</li> </ul>                                                                                                                                                                                                                                                                   | 2 months | -0.4 *<br>p = 0.005      | -0.5 * | 32 |

RCT: randomised controlled trial; IPF: idiopathic pulmonary fibrosis; ILD: interstitial lung disease; PR: pulmonary rehabilitation; IMT: inspiratory muscle training; ADL: activity of daily living; EOL: end-of-life.

\* Mean change reached the minimal important difference of 0.4 unit for people with ILD and IPF. Negative value indicates improvement (55).

Note: Data reported by a total of 9 out of 10 RCTs that measured symptom burden with the Medical Research Council Dyspnoea scale are included in this table (one RCT did not report data (6)).



**Supplement 5.3.2. Mean change from baseline within intervention group in non-RCTs measuring symptom burden with the MRC Dyspnoea scale (n=18)**

| Study                          | Study design                                              | Type of participants | Setting delivering self-management components                   | Self-management components delivered                                                                                                                                                                                                                                                                                                                                                                                                                                                       | Study period | Mean change in MRC scores from baseline in intervention group | Number of participants |
|--------------------------------|-----------------------------------------------------------|----------------------|-----------------------------------------------------------------|--------------------------------------------------------------------------------------------------------------------------------------------------------------------------------------------------------------------------------------------------------------------------------------------------------------------------------------------------------------------------------------------------------------------------------------------------------------------------------------------|--------------|---------------------------------------------------------------|------------------------|
| Brunetti <i>et al.</i> (19)    | Pre-post study (retrospective)                            | ILD                  | PR, inpatient                                                   | <ul style="list-style-type: none"> <li>• Patient education</li> <li>• Behavioural modification</li> <li>• Psychosocial support</li> </ul>                                                                                                                                                                                                                                                                                                                                                  | 3-4 weeks    | -1 *                                                          | 240                    |
| da Fontoura <i>et al.</i> (21) | Pre-post study (retrospective)                            | IPF                  | PR, outpatient                                                  | <ul style="list-style-type: none"> <li>• Patient education</li> <li>• Behavioural modification</li> <li>• Managing disease/comorbidities/ADLs</li> <li>• Psychosocial support</li> </ul>                                                                                                                                                                                                                                                                                                   | 12 weeks     | -1 *                                                          | 31                     |
| Deniz <i>et al.</i> (22)       | Pre-post study (prospective)                              | ILD                  | PR, outpatient                                                  | <ul style="list-style-type: none"> <li>• Patient education</li> <li>• Managing physical symptoms</li> </ul>                                                                                                                                                                                                                                                                                                                                                                                | 8 weeks      | -0.5 *                                                        | 57                     |
| Elganady <i>et al.</i> (24)    | Pre-post study (prospective)                              | ILD                  | PR, outpatient                                                  | <ul style="list-style-type: none"> <li>• Patient education</li> <li>• Managing disease/comorbidities/ADLs</li> <li>• Preventing infections/exacerbation</li> </ul>                                                                                                                                                                                                                                                                                                                         | 6 weeks      | -1.2 *                                                        | 20                     |
| Igai <i>et al.</i> (56)        | Mixed methods: pre-post study (prospective) & qualitative | IPF                  | Dignity-centred palliative care program, outpatient/ home-based | <ul style="list-style-type: none"> <li>• Patient education</li> <li>• Behavioural modification</li> <li>• Understanding treatment options</li> <li>• Managing treatments</li> <li>• Self-monitoring</li> <li>• Managing disease/comorbidities/ADLs</li> <li>• Managing physical symptoms</li> <li>• Preventing infections/exacerbation</li> <li>• Understanding disease</li> <li>• Psychosocial support</li> <li>• Sexuality/self-esteem</li> <li>• Palliation and EOL planning</li> </ul> | 45 days      | 0                                                             | 12                     |
| Igarashi <i>et al.</i> (32)    | Non-randomised controlled study                           | ILD                  | PR, outpatient                                                  | <ul style="list-style-type: none"> <li>• Patient education</li> <li>• Home exercise program</li> <li>• Behavioural modification</li> <li>• Self-monitoring</li> <li>• Managing physical symptoms</li> <li>• Preventing infections/exacerbation</li> <li>• Understanding disease</li> <li>• Psychosocial support</li> </ul>                                                                                                                                                                 | 3 months     | -0.4 *                                                        | 13                     |

|                             |                                |                       |                |                                                                                                                                                                                                                                                                                                                                         |          |                                     |                                 |
|-----------------------------|--------------------------------|-----------------------|----------------|-----------------------------------------------------------------------------------------------------------------------------------------------------------------------------------------------------------------------------------------------------------------------------------------------------------------------------------------|----------|-------------------------------------|---------------------------------|
| Kaymaz <i>et al.</i> (57)   | Pre-post study (retrospective) | ILD                   | PR, outpatient | <ul style="list-style-type: none"> <li>• Patient education</li> <li>• Home exercise program</li> <li>• Behavioural modification</li> <li>• Managing disease/comorbidities/ADLs</li> <li>• Managing physical symptoms</li> <li>• Understanding disease</li> <li>• Psychosocial support</li> </ul>                                        | 8 weeks  | -0.8 *                              | 10                              |
| Kerti <i>et al.</i> (33)    | Pre-post study (prospective)   | ILD                   | PR, inpatient  | <ul style="list-style-type: none"> <li>• Managing physical symptoms</li> </ul>                                                                                                                                                                                                                                                          | 4 weeks  | ILD: -0.8 *<br>IPF subgroup: -0.6 * | ILD: 30<br>IPF subgroup: 23     |
| Kozu <i>et al.</i> (35)     | Pre-post study (prospective)   | IPF                   | PR, outpatient | <ul style="list-style-type: none"> <li>• Patient education</li> <li>• Home exercise program</li> <li>• Behavioural modification</li> <li>• Self-monitoring</li> <li>• Managing disease/comorbidities/ADLs</li> <li>• Managing physical symptoms</li> <li>• Preventing infections/exacerbation</li> </ul>                                | 8 weeks  | -0.4 *                              | 36                              |
| Lingner <i>et al.</i> (36)  | Pre-post study (prospective)   | Sarcoidosis           | PR, inpatient  | <ul style="list-style-type: none"> <li>• Patient education</li> <li>• Behavioural modification</li> <li>• Understanding treatment options</li> <li>• Managing disease/comorbidities/ADLs</li> <li>• Managing physical symptoms</li> <li>• Psychosocial support</li> </ul>                                                               | 3 weeks  | -0.4 *                              | 262                             |
| Nolan <i>et al.</i> (60)    | Pre-post study (prospective)   | IPF                   | PR, outpatient | <ul style="list-style-type: none"> <li>• Patient education</li> <li>• Home exercise program</li> <li>• Behavioural modification</li> <li>• Managing treatments</li> <li>• Managing disease/comorbidities/ADLs</li> <li>• Preventing infections/exacerbation</li> <li>• Understanding disease</li> <li>• Psychosocial support</li> </ul> | 8 weeks  | -0.7 *                              | 113                             |
| Ochmann <i>et al.</i> (39)  | Longitudinal                   | Silicosis, asbestosis | PR, inpatient  | <ul style="list-style-type: none"> <li>• Behavioural modification</li> <li>• Managing physical symptoms</li> </ul>                                                                                                                                                                                                                      | 4 weeks  | Silicosis: -0.3<br>Asbestosis: 0    | Silicosis: 42<br>Asbestosis: 66 |
| Ozalevli <i>et al.</i> (40) | Pre-post study (prospective)   | IPF                   | PR, home-based | <ul style="list-style-type: none"> <li>• Home exercise program</li> <li>• Managing physical symptoms</li> </ul>                                                                                                                                                                                                                         | 12 weeks | -0.9 *                              | 15                              |
| Rammaert <i>et al.</i> (41) | Pre-post study (prospective)   | IPF                   | PR, home-base  | <ul style="list-style-type: none"> <li>• Patient education</li> <li>• Home exercise program</li> <li>• Self-monitoring</li> </ul>                                                                                                                                                                                                       | 8 weeks  | 0.2                                 | 13                              |

|                            |                                 |                        |                          |                                                                                                                                                                                                                                                                                                                                                                                                                                |                                                                            |                                                     |                                             |
|----------------------------|---------------------------------|------------------------|--------------------------|--------------------------------------------------------------------------------------------------------------------------------------------------------------------------------------------------------------------------------------------------------------------------------------------------------------------------------------------------------------------------------------------------------------------------------|----------------------------------------------------------------------------|-----------------------------------------------------|---------------------------------------------|
| Sanchez-Ramirez (45)       | Pre-post study (retrospective)  | ILD                    | PR, outpatient           | <ul style="list-style-type: none"> <li>• Patient education</li> <li>• Behavioural modification</li> <li>• Understanding treatment options</li> <li>• Managing treatments</li> <li>• Managing disease/comorbidities/ADLs</li> <li>• Managing physical symptoms</li> <li>• Preventing infections/exacerbation</li> <li>• Understanding disease</li> <li>• Psychosocial support</li> <li>• Palliation and EOL planning</li> </ul> | 8 weeks                                                                    | -0.2                                                | 127                                         |
| Shimoda <i>et al.</i> (61) | Pre-post study (prospective)    | Interstitial pneumonia | PR, inpatient            | <ul style="list-style-type: none"> <li>• Patient education</li> <li>• Behavioural modification</li> </ul>                                                                                                                                                                                                                                                                                                                      | median 9 days (ranged 6-12)                                                | -1                                                  | 8                                           |
| Tonelli <i>et al.</i> (48) | Pre-post study (prospective)    | ILD                    | PR, outpatient/inpatient | <ul style="list-style-type: none"> <li>• Patient education</li> <li>• Behavioural modification</li> <li>• Managing treatments</li> <li>• Managing disease/comorbidities/ADLs</li> <li>• Managing physical symptoms</li> <li>• Psychosocial support</li> <li>• Palliation and EOL planning</li> </ul>                                                                                                                           | >24 sessions (6days/week for 1 <sup>st</sup> week; twice daily thereafter) | -1.1 *                                              | 40                                          |
| Trivedi (62)               | Non-randomised controlled study | Silicosis              | PR, outpatient           | <ul style="list-style-type: none"> <li>• Patient education</li> <li>• Managing physical symptoms</li> <li>• Understanding disease</li> </ul>                                                                                                                                                                                                                                                                                   | 4 weeks                                                                    | PR with education: -1.4 *<br>Education only: -0.4 * | PR with education: 24<br>Education only: 24 |

RCT: randomised controlled trial; MRC: Medical Research Council; IPF: idiopathic pulmonary fibrosis; ILD: interstitial lung disease; PR: pulmonary rehabilitation; activity of daily living; EOL: end-of-life.

\* Mean change reached the minimal important difference of 0.4 unit for people with ILD and IPF. Negative value indicates improvement (55).

Note: Within-group mean change for a total of 18 studies that measured symptom burden with the Medical Research Council Dyspnoea scale are included in this table.

**Supplement 5.4.1. Between-groups mean differences and mean change from baseline within intervention group in RCTs measuring psychological wellbeing with the Hospital Anxiety and Depression Scale (HADS) (n=6)**

| Study                          | Study design                     | Type of participants | Setting delivering self-management components          | Self-management components delivered                                                                                                                                                                                                                                                                                                                                                                                                                  | Study period | HADS scores                             |                                                                     | Number of participants in intervention group |
|--------------------------------|----------------------------------|----------------------|--------------------------------------------------------|-------------------------------------------------------------------------------------------------------------------------------------------------------------------------------------------------------------------------------------------------------------------------------------------------------------------------------------------------------------------------------------------------------------------------------------------------------|--------------|-----------------------------------------|---------------------------------------------------------------------|----------------------------------------------|
|                                |                                  |                      |                                                        |                                                                                                                                                                                                                                                                                                                                                                                                                                                       |              | Between-groups mean difference          | Mean change from baseline in intervention group                     |                                              |
| Bajwah <i>et al.</i> (52)      | Mixed methods: RCT & qualitative | IPF                  | Hospital2Home program with case conference, home-based | <ul style="list-style-type: none"> <li>• Patient education</li> <li>• Managing physical symptoms</li> <li>• Preventing infections/exacerbation</li> <li>• Goal setting</li> <li>• Psychosocial support</li> <li>• Palliation and EOL planning</li> </ul>                                                                                                                                                                                              | 2 months     | Data not reported for 2m                | A: -1.5<br>D: 0.4                                                   | 23                                           |
| Dowman <i>et al.</i> (2)       | RCT                              | ILD                  | PR, outpatient                                         | <ul style="list-style-type: none"> <li>• Patient education</li> <li>• Home exercise program</li> <li>• Behavioural modification</li> <li>• Understanding treatment options</li> <li>• Self-monitoring</li> <li>• Managing disease/comorbidities/ADLs</li> <li>• Managing physical symptoms</li> <li>• Preventing infections/exacerbation</li> <li>• Understanding disease</li> <li>• Psychosocial support</li> <li>• Sexuality/self-esteem</li> </ul> | 8 weeks      | Data not reported                       | ILD<br>A: -0.9<br>D: -0.6<br><br>IPF subgroup<br>A: -0.3<br>D: -0.1 | ILD: 74<br>IPF subgroup: 32                  |
| Janssen <i>et al.</i> (54)     | RCT                              | IPF                  | Palliative care program, outpatient                    | <ul style="list-style-type: none"> <li>• Managing physical symptoms</li> <li>• Understanding disease</li> <li>• Goal setting</li> <li>• Psychosocial support</li> <li>• Palliation and EOL planning</li> </ul>                                                                                                                                                                                                                                        | 6 months     | A: -1.2 (NS)<br>D: 0 (NS)               | A: -0.8<br>D: 0.7                                                   | 9                                            |
| Moor <i>et al.</i> (2020) (63) | RCT                              | IPF                  | Home spirometry and monitoring program, home-based     | <ul style="list-style-type: none"> <li>• Patient education</li> <li>• Managing treatments</li> <li>• Self-monitoring</li> </ul>                                                                                                                                                                                                                                                                                                                       | 24 weeks     | A: -0.05 (NS)<br>D: -0.4 (NS)           | A: 0.1<br>D: 0.3                                                    | 38                                           |
| Naz <i>et al.</i> (7)          | RCT                              | Sarcoidosis          | PR, outpatient                                         | <ul style="list-style-type: none"> <li>• Home exercise program</li> <li>• Self-monitoring</li> <li>• Managing physical symptoms</li> </ul>                                                                                                                                                                                                                                                                                                            | 12 weeks     | A: -2.5 *<br>p = 0.04<br>D: -3.1 * (NS) | A: -2.3<br>D: -1.8                                                  | 9                                            |

|                                    |     |             |                |                                                                                                                                                                                                                                                                                                                                                                                                                   |          |                          |                    |    |
|------------------------------------|-----|-------------|----------------|-------------------------------------------------------------------------------------------------------------------------------------------------------------------------------------------------------------------------------------------------------------------------------------------------------------------------------------------------------------------------------------------------------------------|----------|--------------------------|--------------------|----|
| Wallaert <i>et al.</i> (2020) (59) | RCT | Sarcoidosis | PR, outpatient | <ul style="list-style-type: none"> <li>• Patient education</li> <li>• Behavioural modification</li> <li>• Understanding treatment options</li> <li>• Managing disease/comorbidities/ADLs</li> <li>• Managing physical symptoms</li> <li>• Preventing infections/exacerbation</li> <li>• Understanding disease</li> <li>• Goal setting</li> <li>• Psychosocial support</li> <li>• Sexuality/self-esteem</li> </ul> | 2 months | Data not reported for 2m | A: -0.5<br>D: -0.4 | 18 |
|------------------------------------|-----|-------------|----------------|-------------------------------------------------------------------------------------------------------------------------------------------------------------------------------------------------------------------------------------------------------------------------------------------------------------------------------------------------------------------------------------------------------------------|----------|--------------------------|--------------------|----|

RCT: randomised controlled trial; IPF: idiopathic pulmonary fibrosis; ILD: interstitial lung disease; PR: pulmonary rehabilitation; ADL: activity of daily living; EOL: end-of-life; A: anxiety; D: depression.

\* Mean change reached the minimal important difference of 2.4 units for people with ILD and IPF. Negative value indicates improvement (55).

Note: Data reported by a total of 6 out of 7 RCTs that measured psychological wellbeing with the Hospital Anxiety and Depression Scale are included in this table (one RCT did not report data immediately post-intervention (5)).

**Supplement 5.4.2. Mean change from baseline within intervention group in non- RCTs measuring psychological wellbeing with the HADS (n=11)**

| Study                      | Study design                                              | Type of participants                       | Setting delivering self-management components                  | Self-management components delivered                                                                                                                                                                                                                                                                                                                                                                                                                                                       | Study period | Mean change in HADS scores from baseline in intervention group | Number of participants |
|----------------------------|-----------------------------------------------------------|--------------------------------------------|----------------------------------------------------------------|--------------------------------------------------------------------------------------------------------------------------------------------------------------------------------------------------------------------------------------------------------------------------------------------------------------------------------------------------------------------------------------------------------------------------------------------------------------------------------------------|--------------|----------------------------------------------------------------|------------------------|
| Chéhère <i>et al.</i> (20) | Pre-post study (prospective)                              | Fibrotic idiopathic interstitial pneumonia | PR, home-based                                                 | <ul style="list-style-type: none"> <li>• Patient education</li> <li>• Behavioural modification</li> <li>• Understanding treatment options</li> <li>• Managing disease/comorbidities/ADLs</li> <li>• Managing physical symptoms</li> <li>• Preventing infections/exacerbation</li> <li>• Understanding disease</li> <li>• Goal setting</li> <li>• Psychosocial support</li> <li>• Sexuality/self-esteem</li> </ul>                                                                          | 8 weeks      | A: -0.9<br>D: -0.1                                             | 19                     |
| Deniz <i>et al.</i> (22)   | Pre-post study (prospective)                              | ILD                                        | PR, outpatient                                                 | <ul style="list-style-type: none"> <li>• Patient education</li> <li>• Managing physical symptoms</li> </ul>                                                                                                                                                                                                                                                                                                                                                                                | 8 weeks      | A: -1.7<br>D: -1.3                                             | 57                     |
| Igai <i>et al.</i> (56)    | Mixed methods: pre-post study (prospective) & qualitative | IPF                                        | Dignity-centred palliative care program, outpatient/home-based | <ul style="list-style-type: none"> <li>• Patient education</li> <li>• Behavioural modification</li> <li>• Understanding treatment options</li> <li>• Managing treatments</li> <li>• Self-monitoring</li> <li>• Managing disease/comorbidities/ADLs</li> <li>• Managing physical symptoms</li> <li>• Preventing infections/exacerbation</li> <li>• Understanding disease</li> <li>• Psychosocial support</li> <li>• Sexuality/self-esteem</li> <li>• Palliation and EOL planning</li> </ul> | 45 days      | A: -0.3<br>D: -1.6                                             | 12                     |
| Kaymaz <i>et al.</i> (57)  | Pre-post study (retrospective)                            | ILD                                        | PR, outpatient                                                 | <ul style="list-style-type: none"> <li>• Patient education</li> <li>• Home exercise program</li> <li>• Behavioural modification</li> <li>• Managing disease/comorbidities/ADLs</li> <li>• Managing physical symptoms</li> <li>• Understanding disease</li> <li>• Psychosocial support</li> </ul>                                                                                                                                                                                           | 8 weeks      | A: -1.5<br>D: -3.1 *                                           | 10                     |

|                                |                                 |                          |                                                    |                                                                                                                                                                                                                                                                                                                                                                               |                                        |                                                                         |                                 |
|--------------------------------|---------------------------------|--------------------------|----------------------------------------------------|-------------------------------------------------------------------------------------------------------------------------------------------------------------------------------------------------------------------------------------------------------------------------------------------------------------------------------------------------------------------------------|----------------------------------------|-------------------------------------------------------------------------|---------------------------------|
| Lingner <i>et al.</i> (36)     | Pre-post study (prospective)    | Sarcoidosis              | PR, inpatient                                      | <ul style="list-style-type: none"> <li>• Patient education</li> <li>• Behavioural modification</li> <li>• Understanding treatment options</li> <li>• Managing disease/comorbidities/ADLs</li> <li>• Managing physical symptoms</li> <li>• Psychosocial support</li> </ul>                                                                                                     | 3 weeks                                | A: -1.6<br>D: -0.9                                                      | 296                             |
| Moor <i>et al.</i> (2021) (64) | Pre-post study (prospective)    | Sclerosis-associated ILD | Home spirometry and monitoring program, home-based | <ul style="list-style-type: none"> <li>• Patient education</li> <li>• Managing treatments</li> <li>• Self-monitoring</li> </ul>                                                                                                                                                                                                                                               | 3 months                               | A: 0.6<br>D: 0.1                                                        | 10                              |
| Naji <i>et al.</i> (59)        | Pre-post study (retrospective)  | ILD                      | PR, outpatient/inpatient                           | <ul style="list-style-type: none"> <li>• Patient education</li> <li>• Home exercise program</li> <li>• Behavioural modification</li> <li>• Managing treatments</li> <li>• Self-monitoring</li> <li>• Managing physical symptoms</li> </ul>                                                                                                                                    | 8 weeks                                | A: -2.7 *<br>D: -2.4 *                                                  | 26                              |
| Ochmann <i>et al.</i> (39)     | Longitudinal                    | Silicosis, asbestosis    | PR, inpatient                                      | <ul style="list-style-type: none"> <li>• Behavioural modification</li> <li>• Managing physical symptoms</li> </ul>                                                                                                                                                                                                                                                            | 4 weeks                                | Silicosis<br>A: -2.9 *<br>D: 0.1<br><br>Asbestosis<br>A: -2.1<br>D: 0.1 | Silicosis: 42<br>Asbestosis: 66 |
| Sciriha <i>et al.</i> (46)     | Non-randomised controlled study | ILD                      | PR, outpatient                                     | <ul style="list-style-type: none"> <li>• Patient education</li> <li>• Home exercise program</li> <li>• Managing treatments</li> <li>• Self-monitoring</li> </ul>                                                                                                                                                                                                              | 12 weeks                               | A: -0.4<br>D: 0.5                                                       | 60                              |
| Tsang <i>et al.</i> (49)       | Pre-post study (retrospective)  | Pneumoconiosis           | PR, community-based (CBRP)/ home-based (HBRP)      | <ul style="list-style-type: none"> <li>• Patient education</li> <li>• Home exercise program</li> <li>• Behavioural modification</li> <li>• Managing treatments</li> <li>• Managing disease/comorbidities/ADLs</li> <li>• Managing physical symptoms</li> <li>• Preventing infections/exacerbation</li> <li>• Understanding disease</li> <li>• Psychosocial support</li> </ul> | CBRP: 4-6 weeks<br>HBRP: 8 home visits | CBRP<br>A: 0.1<br>D: -1.5<br><br>HBRP<br>A: -1.6<br>D: 0.1              | CBRP: 155<br>HBRP: 26           |

|                                    |                                |                                            |                |                                                                                                                                                                                                                                                                                                                                                                                                                                                                               |          |                    |     |
|------------------------------------|--------------------------------|--------------------------------------------|----------------|-------------------------------------------------------------------------------------------------------------------------------------------------------------------------------------------------------------------------------------------------------------------------------------------------------------------------------------------------------------------------------------------------------------------------------------------------------------------------------|----------|--------------------|-----|
| Wallaert <i>et al.</i> (2019) (62) | Pre-post study (retrospective) | Fibrotic idiopathic interstitial pneumonia | PR, home-based | <ul style="list-style-type: none"> <li>• Patient education</li> <li>• Home exercise program</li> <li>• Behavioural modification</li> <li>• Understanding treatment options</li> <li>• Self-monitoring</li> <li>• Managing disease/comorbidities/ADLs</li> <li>• Managing physical symptoms</li> <li>• Preventing infections/exacerbation</li> <li>• Understanding disease</li> <li>• Goal setting</li> <li>• Psychosocial support</li> <li>• Sexuality/self-esteem</li> </ul> | 2 months | A: -1.1<br>D: -0.7 | 101 |
|------------------------------------|--------------------------------|--------------------------------------------|----------------|-------------------------------------------------------------------------------------------------------------------------------------------------------------------------------------------------------------------------------------------------------------------------------------------------------------------------------------------------------------------------------------------------------------------------------------------------------------------------------|----------|--------------------|-----|

RCT: randomised controlled trial; IPF: idiopathic pulmonary fibrosis; ILD: interstitial lung disease; PR: pulmonary rehabilitation; ADL: activity of daily living; EOL: end-of-life; A: anxiety; D: depression.

\* Mean change reached the minimal important difference of 2.4 units for people with ILD and IPF. Negative value indicates improvement (55).

Note: Data reported for a total of 11 out of 13 studies that measured psychological wellbeing with the Hospital Anxiety and Depression Scale are included in this table (two pre-post studies did not report data (41, 66)).



## References

1. Cerdán-de-las-Heras J, Balbino F, Løkke A, et al. Tele-rehabilitation program in idiopathic pulmonary fibrosis - a single-center randomized trial. *Int J Environ Res Public Health*. 2021; 18: 10016.
2. Dowman LM, McDonald CF, Hill CJ, et al. The evidence of benefits of exercise training in interstitial lung disease: a randomised controlled trial. *Thorax*. 2017; 72: 610-619.
3. Holland AE, Hill CJ, Conron M, et al. Short term improvement in exercise capacity and symptoms following exercise training in interstitial lung disease. *Thorax*. 2008; 63: 549-554.
4. Jackson RM, Gómez-Marín OW, Ramos CF, et al. Exercise limitation in IPF patients: a randomized trial of pulmonary rehabilitation. *Lung*. 2014; 192: 367-376.
5. Jarosch I, Schneeberger T, Gloeckl R, et al. Short-term effects of comprehensive pulmonary rehabilitation and its maintenance in patients with idiopathic pulmonary fibrosis: a randomized controlled trial. *J Clin Med*. 2020; 9: 1567.
6. Ku V, Janmeja AK, Aggarwal D, et al. Pulmonary rehabilitation in patients with interstitial lung diseases in an outpatient setting: a randomised controlled trial. *Indian J Chest Dis Allied Sci*. 2017; 59: 75-80.
7. Naz I, Ozalevli S, Ozkan S, et al. Efficacy of a structured exercise program for improving functional capacity and quality of life in patients with stage 3 and 4 sarcoidosis: a randomized controlled trial. *J Cardiopulm Rehabil Prev*. 2018; 38: 124-130.
8. Nishiyama O, Kondoh Y, Kimura T, et al. Effects of pulmonary rehabilitation in patients with idiopathic pulmonary fibrosis. *Respirology*. 2008; 13: 394-399.
9. Perez-Bogerd S, Wuyts W, Barbier V, et al. Short and long-term effects of pulmonary rehabilitation in interstitial lung diseases: a randomised controlled trial. *Respir Res*. 2018; 19: 182.

10. Prajapat B, Sandhya AS, Menon B, et al. Effect of pulmonary rehabilitation on systemic inflammation muscle mass and functional status in interstitial lung diseases. *Int J Sci Res.* 2016; 5: 760-766.
11. Shen L, Zhang Y, Su Y, et al. New pulmonary rehabilitation exercise for pulmonary fibrosis to improve the pulmonary function and quality of life of patients with idiopathic pulmonary fibrosis: a randomized control trial. *Ann Palliat Med.* 2021; 10: 7289-7297.
12. Vainshelboim B, Oliveira J, Yehoshua L, et al. Exercise training-based pulmonary rehabilitation program is clinically beneficial for idiopathic pulmonary fibrosis. *Respiration.* 2014; 88: 378-388.
13. Vainshelboim B, Fox BD, Kramer MR, et al. Short-term improvement in physical activity and body composition after supervised exercise training program in idiopathic pulmonary fibrosis. *Arch Phys Med Rehabil.* 2016; 97: 788-797.
14. Zaki S, Moiz JA, Mujaddadi A, et al. Does inspiratory muscle training provide additional benefits during pulmonary rehabilitation in people with interstitial lung disease? A randomized control trial. *Physiother Theory Pract.* 2022; 39: 518-528.
15. Zhou M, Zhang H, Li F, et al. Pulmonary Daoyin as a traditional Chinese medicine rehabilitation programme for patients with IPF: a randomized controlled trial. *Respirology.* 2021; 26: 360-369.
16. Vainshelboim B, Oliveira J, Fox BD, et al. Long-term effects of a 12-week exercise training program on clinical outcomes in idiopathic pulmonary fibrosis. *Lung.* 2015; 193: 345-354.
17. Holland AE, Spruit MA, Troosters T, et al. An official European Respiratory Society/American Thoracic Society technical standard: field walking tests in chronic respiratory disease. *Eur Respir J.* 2014; 44: 1428-1446.
18. Arizono S, Taniguchi H, Sakamoto K, et al. Pulmonary rehabilitation in patients with idiopathic pulmonary fibrosis: comparison with chronic obstructive pulmonary disease. *Sarcoidosis Vasc Diffuse Lung Dis.* 2017; 34: 283-289.
19. Brunetti G, Malovini A, Maniscalco M, et al. Pulmonary rehabilitation in patients with interstitial lung diseases: correlates of success. *Respir Med.* 2021; 185: 106473.

20. Chéhère B, Bougault V, Chenivresse C, et al. Cardiorespiratory adaptation during 6-minute walk test in fibrotic idiopathic interstitial pneumonia patients who did or did not respond to pulmonary rehabilitation. *Eur J Phys Rehabil Med*. 2019; 55: 103-112.
21. da Fontoura FF, Berton DC, Watte G, et al. Pulmonary rehabilitation in patients with advanced idiopathic pulmonary fibrosis referred for lung transplantation. *J Cardiopulm Rehabil Prev*. 2018; 38: 131-134.
22. Deniz S, Sahin H, Yalniz E. Does the severity of interstitial lung disease affect the gains from pulmonary rehabilitation? *Clinical Respir J*. 2018; 12: 2141-2150.
23. Devani P, Pinto N, Jain P, et al. Effect of pulmonary rehabilitation (PR) program in patients with interstitial lung disease (ILD) - Indian scenario. *J Assoc Physicians India*. 2019; 67: 28-33.
24. Elganady A, El Hoshy M, Eshmawey H, et al. Value of pulmonary rehabilitation in interstitial lung diseases. *Egypt J Chest Dis Tuberc*. 2020; 69: 542-548.
25. Ferreira G, Feuerman M, Spiegler P. Results of an 8-week, outpatient pulmonary rehabilitation program on patients with and without chronic obstructive pulmonary disease. *J Cardiopulm Rehabil*. 2006; 26: 54-60.
26. Ferreira A, Garvey C, Connors GL, et al. Pulmonary rehabilitation in interstitial lung disease: benefits and predictors of response. *Chest*. 2009; 135:442-447.
27. Fuschillo S, De Felice A, Elia A, et al. Effect of pulmonary rehabilitation on functional exercise capacity and hypoxemia in patients with interstitial lung diseases: a retrospective study. *Sarcoidosis Vasc Diffuse Lung Dis*. 2018; 35:245-251.
28. Grongstad A, Spruit MA, Oldervoll LM, et al. Pulmonary rehabilitation in patients with pulmonary sarcoidosis: impact on exercise capacity and fatigue. *Respiration*. 2020; 99: 289-297.
29. Guler SA, Hur SA, Stickland MK, et al. Survival after inpatient or outpatient pulmonary rehabilitation in patients with fibrotic interstitial lung disease: a multicentre retrospective cohort study. *Thorax*. 2022; 77: 589-595.

30. Holland AE, Hill CJ, Gaspole I, et al. Predictors of benefit following pulmonary rehabilitation for interstitial lung disease. *Respir Med.* 2012; 106: 429-435.
31. Huppmann P, Szczepanski B, Boensch M, et al. Effects of inpatient pulmonary rehabilitation in patients with interstitial lung disease. *Eur Respir J.* 2013; 42: 444-453.
32. Igarashi A, Iwanami Y, Sugino K, et al. Using 6-min walk distance expressed as a percentage of reference to evaluate the effect of pulmonary rehabilitation in elderly patients with interstitial lung disease. *J Cardiopulm Rehabil Prev.* 2018; 38: 342-347.
33. Kerti M, Kelemen K, Varga J. The effectiveness of pulmonary rehabilitation in comparison interstitial lung diseases and idiopathic pulmonary fibrosis. *J Pulm Respir Med.* 2018; 8: 1000475.
34. Keyser RE, Woolstenhulme JG, Chin LMK, et al. Cardiorespiratory function before and after aerobic exercise training in patients with interstitial lung disease. *J Cardiopulm Rehabil Prev.* 2015; 35: 47-55.
35. Kozu R, Senjyu H, Jenkins SC, et al. Differences in response to pulmonary rehabilitation in idiopathic pulmonary fibrosis and chronic obstructive pulmonary disease. *Respiration.* 2011; 81: 196-205.
36. Lingner H, Buhr-Schinner H, Hummel S, et al. Short-term effects of a multimodal 3-week inpatient pulmonary rehabilitation programme for patients with sarcoidosis: the ProKaSaRe study. *Respiration.* 2018; 95: 343-353.
37. Matsuo S, Okamoto M, Ikeuchi T, et al. Early intervention of pulmonary rehabilitation for fibrotic interstitial lung disease is a favorable factor for short-term improvement in health-related quality of life. *J Clin Med.* 2021; 10: 3153.
38. Nasrat SA, El-Hady AAA, Hafiz HA, et al. The efficacy of pulmonary rehabilitation combined with threshold inspiratory muscle training and upper extremities exercises in patients with interstitial lung diseases. *Syst Rev Pharm.* 2021; 12: 527-533.
39. Ochmann U, Kotschy-Lang N, Raab W, et al. Long-term efficacy of pulmonary rehabilitation in patients with occupational respiratory diseases. *Respiration.* 2012; 84: 396-405.

40. Ozalevli S, Karaali HK, Ilgin D, et al. Effect of home-based pulmonary rehabilitation in patients with idiopathic pulmonary fibrosis. *Multidiscip Respir Med.* 2010; 5: 31-37.
41. Rammaert B, Leroy S, Cavestri B, et al. Home-based pulmonary rehabilitation in idiopathic pulmonary fibrosis. *Rev Mal Respir.* 2011; 28: e52-57.
42. Rifaat N, Anwar E, Ali YM, et al. Value of pulmonary rehabilitation in patients with idiopathic pulmonary fibrosis. *Egypt J Chest Dis Tuberc.* 2014; 63: 1013-1017.
43. Ryerson CJ, Cayou C, Topp F, et al. Pulmonary rehabilitation improves long-term outcomes in interstitial lung disease: a prospective cohort study. *Respir Med.* 2014; 108: 203-210.
44. Salhi B, Troosters T, Behaegel M, et al. Effects of pulmonary rehabilitation in patients with restrictive lung diseases. *Chest.* 2010; 137: 273-279.
45. Sanchez-Ramirez DC. Impact of pulmonary rehabilitation services in patients with different lung diseases. *J Clin Med.* 2022; 11: 407.
46. Sciriha A, Lungaro-Mifsud S, Fsadni P, et al. Pulmonary rehabilitation in patients with interstitial lung disease: the effects of a 12-week programme. *Respir Med.* 2019; 146: 49-56.
47. Swigris JJ, Fairclough DL, Morrison M, et al. Benefits of pulmonary rehabilitation in idiopathic pulmonary fibrosis. *Respir Care.* 2011; 56: 783-789.
48. Tonelli R, Cocconcelli E, Lanini B, et al. Effectiveness of pulmonary rehabilitation in patients with interstitial lung disease of different etiology: a multicenter prospective study. *BMC Pulm Med.* 2017; 17: 130.
49. Tsang EW, Kwok H, Chan AKY, et al. Outcomes of community-based and home-based pulmonary rehabilitation for pneumoconiosis patients: a retrospective study. *BMC Pulm Med.* 2018; 18: 133.
50. Sgalla G, Cerri S, Ferrari R, et al. Mindfulness-based stress reduction in patients with interstitial lung diseases: a pilot, single-centre observational study on safety and efficacy. *BMJ Open Respir Res.* 2015; 2: e00065.

51. Al Moamary MS. Impact of a pulmonary rehabilitation programme on respiratory parameters and health care utilization in patients with chronic lung diseases other than COPD. *East Mediterr Health J.* 2012; 18: 120-126.
52. Bajwah S, Ross JR, Wells AU, et al. Palliative care for patients with advanced fibrotic lung disease: a randomised controlled phase II and feasibility trial of a community case conference. *Thorax.* 2015; 70: 830-839.
53. Gaunard IA, Gomez-Marin OW, Ramos CF, et al. Physical activity and quality of life improvements of patients with idiopathic pulmonary fibrosis completing a pulmonary rehabilitation program. *Respir care.* 2014; 59: 1872-1879.
54. Janssen K, Rosielle D, Wang Q, et al. The impact of palliative care on quality of life, anxiety, and depression in idiopathic pulmonary fibrosis: a randomized controlled pilot study. *Respir Res.* 2020; 21: 2: <https://doi.org/10.1186/s12931-019-1266-9>.
55. Kim JW, Clark A, Birring SS, et al. Psychometric properties of patient reported outcome measures in idiopathic pulmonary fibrosis. *Chron Respir Dis.* 2021; 18: 14799731211033925.
56. Igai Y, Porter SE. Development and applicability of a dignity-centred palliative care programme for people with idiopathic pulmonary fibrosis: a qualitative-driven mixed methods study. *Nurs Open.* 2022; 10: 8-23.
57. Kaymaz D, Ergun P, Candemir I, et al. Pulmonary rehabilitation in interstitial lung diseases. *Tuberk Toraks.* 2013; 61: 295-302.
58. Naji NA, Connor MC, Donnelly SC, et al. Effectiveness of pulmonary rehabilitation in restrictive lung disease. *J Cardiopulm Rehabil.* 2006; 26: 237-243.
59. Wallaert B, Kyheng M, Labreuche J, et al. Long-term effects of pulmonary rehabilitation on daily life physical activity of patients with stage IV sarcoidosis: a randomized controlled trial. *Respir Med Res.* 2020; 77: 1-7.

60. Nolan CM, Polgar O, Schofield SJ, et al. Pulmonary rehabilitation in idiopathic pulmonary fibrosis and COPD: a propensity-matched real-world study. *Chest*. 2022; 161: 728-737.
61. Shimoda M, Takao S, Kokutou H, et al. In-hospital pulmonary rehabilitation after completion of primary respiratory disease treatment improves physical activity and ADL performance: a prospective intervention study. *Medicine*. 2021; 100: e28151.
62. Trivedi SJ. Effect of pulmonary rehabilitation on functional capacity of lungs and dyspnea in patient with silicosis in Anand district of Gujarat. *Indian J Physiother Occup Ther*. 2017; 11: 207-209.
63. Moor CC, Mostard RLM, Grutters JC, et al. Home monitoring in patients with idiopathic pulmonary fibrosis: a randomized controlled trial. *Am J Respir Crit Care Med*. 2020; 202: 393-401.
64. Moor CC, Leuven Slv, Wijsenbeek MS, et al. Feasibility of online home spirometry in systemic sclerosis-associated interstitial lung disease: a pilot study. *Rheumatol*. 2021; 60: 2467-2471.
65. Wallaert B, Duthoit L, Drumez E, et al. Long-term evaluation of home-based pulmonary rehabilitation in patients with fibrotic idiopathic interstitial pneumonias. *ERJ Open Res*. 2019; 5: 00045-2019.
66. Sharp C, McCabe M, Hussain MJ, et al. Duration of benefit following completion of pulmonary rehabilitation in interstitial lung disease-an observational study. *QJM*. 2017; 110: 17-22.
